# Supplementary material
Source: publisher figshare collection journal article supplement (https://gsajournals.figshare.com/ndownloader/files/26193638)
Supplement: Supplementary file 1 [file 26193638]

## Sheet: Table S8
Table S8. Statistically significant results from a genome-wide association study of 11 elemental grain phenotypes in the Ames panel
Phenotype	SNP ID	Chr	Position (bp)	P-value	FDR-adjusted P-values	MAF	R2LR from model without SNP	R2LR from model with SNP	Transformed effect estimates	Ames locus number	NAM QTL number
B	3-127437482	3	127437482	4.84e-08	0.0459125	0.0905077	0.086341	0.101495	-0.00959998	1
B	3-127514761	3	127514761	5.46e-08	0.0459125	0.080574	0.086341	0.101374	-0.010572	1
B	3-127606917	3	127606917	1.84e-07	0.0474558	0.0816777	0.086341	0.100166	-0.0101178	1
B	3-127607437	3	127607437	1.1e-07	0.0459125	0.102097	0.086341	0.100675	-0.00861623	1
B	3-127744215	3	127744215	1.44e-07	0.0459125	0.0827815	0.086341	0.100409	-0.010037	1
B	3-127749343	3	127749343	1.99e-07	0.0494327	0.0932671	0.086341	0.100093	-0.00906159	1
B	3-127802824	3	127802824	1.44e-07	0.0459125	0.0827815	0.086341	0.100409	-0.010037	1
B	3-127810416	3	127810416	1.34e-07	0.0459125	0.084989	0.086341	0.100483	-0.00980786	1
B	3-127816820	3	127816820	8.99e-08	0.0459125	0.0855408	0.086341	0.100878	-0.00989526	1
B	3-127822936	3	127822936	1.44e-07	0.0459125	0.0827815	0.086341	0.100409	-0.010037	1
B	3-127823666	3	127823666	6.6e-08	0.0459125	0.0871965	0.086341	0.101186	-0.00983056	1
B	3-127841465	3	127841465	2.68e-08	0.0459125	0.0855408	0.086341	0.102083	-0.0102902	1
B	3-127841758	3	127841758	4.96e-08	0.0459125	0.0772627	0.086341	0.10147	-0.0104171	1
B	3-127844622	3	127844622	1.67e-07	0.0459125	0.084989	0.086341	0.100267	-0.00980136	1
B	3-127844727	3	127844727	1.57e-07	0.0459125	0.093819	0.086341	0.100326	-0.00925392	1
B	3-127847296	3	127847296	9.15e-08	0.0459125	0.0838852	0.086341	0.100861	-0.0101173	1
B	3-127849348	3	127849348	1.44e-07	0.0459125	0.0827815	0.086341	0.100409	-0.010037	1
B	3-127850872	3	127850872	1.45e-07	0.0459125	0.0767108	0.086341	0.100403	-0.0100985	1
B	3-127880683	3	127880683	6.37e-08	0.0459125	0.0833333	0.086341	0.101221	-0.0104125	1
B	3-127880754	3	127880754	1.09e-07	0.0459125	0.0844371	0.086341	0.100685	-0.010177	1
B	3-127883402	3	127883402	1.22e-07	0.0459125	0.0827815	0.086341	0.100576	-0.0098713	1
B	3-127883652	3	127883652	7.24e-08	0.0459125	0.0855408	0.086341	0.101094	-0.0102102	1
B	3-127903808	3	127903808	1.39e-07	0.0459125	0.0844371	0.086341	0.100448	-0.0101492	1
B	3-127942090	3	127942090	1.66e-07	0.0459125	0.0827815	0.086341	0.100267	-0.010177	1
B	3-128639168	3	128639168	1.33e-07	0.0459125	0.28532	0.086341	0.100486	0.00537437	2
B	3-128693026	3	128693026	6.47e-08	0.0459125	0.290839	0.086341	0.101205	0.00550276	2
B	3-128693160	3	128693160	1.74e-07	0.0463231	0.288631	0.086341	0.100223	0.00534209	2
B	3-128695819	3	128695819	1.65e-07	0.0459125	0.277594	0.086341	0.100274	0.0053872	2
B	3-128708648	3	128708648	1.11e-07	0.0459125	0.289735	0.086341	0.100669	0.00540945	2
B	3-128711214	3	128711214	1.04e-07	0.0459125	0.286976	0.086341	0.100735	0.0054242	2
B	3-128711300	3	128711300	1.06e-07	0.0459125	0.270971	0.086341	0.100719	0.00546509	2
Cu	1-232016109	1	232016109	1.42e-07	0.00726807	0.140177	0.232005	0.243843	0.0173604
Cu	3-226076273	3	226076273	6e-07	0.0210401	0.206954	0.232005	0.242646	0.013799	3
Cu	3-226076281	3	226076281	1.63e-06	0.0444005	0.193157	0.232005	0.241817	0.01365	3
Cu	3-226076292	3	226076292	8.52e-07	0.0280958	0.200331	0.232005	0.242355	0.0137996	3
Cu	5-200127875	5	200127875	1.37e-06	0.0399545	0.23234	0.232005	0.241964	0.0132851
Cu	7-15035077	7	15035077	1.61e-06	0.044097	0.169426	0.232005	0.241831	-0.0165038	4
Cu	7-15037330	7	15037330	9.53e-07	0.0305266	0.165563	0.232005	0.242262	-0.0173442	4
Cu	8-134435028	8	134435028	1.5e-06	0.0419901	0.231236	0.232005	0.241889	0.0138503	5	Cu-6
Cu	8-134482489	8	134482489	1.83e-06	0.048242	0.281457	0.232005	0.241724	-0.0131828	5	Cu-6
Cu	8-134483874	8	134483874	3.66e-07	0.0153392	0.270419	0.232005	0.243057	-0.0141021	5	Cu-6
Cu	8-134484004	8	134484004	1.17e-06	0.0354622	0.279249	0.232005	0.242091	-0.0134226	5	Cu-6
Cu	8-134502058	8	134502058	1.05e-06	0.0324942	0.290287	0.232005	0.242183	-0.0130836	5	Cu-6
Cu	8-134502063	8	134502063	1.29e-07	0.00695606	0.27649	0.232005	0.243924	-0.014466	5	Cu-6
Cu	8-134502109	8	134502109	3.46e-07	0.0147428	0.278698	0.232005	0.243103	-0.0139934	5	Cu-6
Cu	8-134502311	8	134502311	1.32e-06	0.0391078	0.333885	0.232005	0.241994	0.0126289	5	Cu-6
Cu	8-134502373	8	134502373	7.65e-07	0.0260038	0.334989	0.232005	0.242444	0.0128846	5	Cu-6
Cu	8-134503903	8	134503903	5.09e-07	0.0189908	0.239514	0.232005	0.242781	-0.0136601	5	Cu-6
Cu	8-134661267	8	134661267	1.85e-06	0.0484553	0.0750552	0.232005	0.241713	0.0237206	5	Cu-6
Cu	8-134665560	8	134665560	1.48e-06	0.0418477	0.0761589	0.232005	0.241898	0.0238681	5	Cu-6
Cu	8-134667446	8	134667446	1.08e-06	0.0332708	0.0789183	0.232005	0.242159	0.0231602	5	Cu-6
Cu	8-134699587	8	134699587	9.12e-07	0.0294525	0.0761589	0.232005	0.242299	0.0241053	5	Cu-6
Cu	8-135049367	8	135049367	2.58e-07	0.0113728	0.0700883	0.232005	0.243348	-0.0234201		Cu-6
Cu	8-136725883	8	136725883	3.56e-08	0.00276434	0.0678808	0.232005	0.244998	0.0310729	6	Cu-6
Cu	8-136842119	8	136842119	1.02e-06	0.0318779	0.104857	0.232005	0.242203	0.0205351	6	Cu-6
Cu	8-136852816	8	136852816	1.66e-09	0.000382078	0.102097	0.232005	0.247574	0.0259552	6	Cu-6
Cu	8-136855101	8	136855101	2.54e-08	0.00225296	0.113135	0.232005	0.245281	0.0222678	6	Cu-6
Cu	8-136857368	8	136857368	3.98e-07	0.0161809	0.300773	0.232005	0.242985	-0.0133362	6	Cu-6
Cu	8-136857539	8	136857539	9.1e-15	2.34e-08	0.402318	0.232005	0.257918	0.0210209	6	Cu-6
Cu	8-136858035	8	136858035	9.82e-09	0.00120408	0.294702	0.232005	0.246078	0.0158252	6	Cu-6
Cu	8-136858184	8	136858184	2.7e-09	0.000469477	0.309051	0.232005	0.247165	0.0165449	6	Cu-6
Cu	8-136858199	8	136858199	8.81e-14	1.45e-07	0.431567	0.232005	0.255963	0.0197939	6	Cu-6
Cu	8-136858229	8	136858229	1.3e-13	1.68e-07	0.433223	0.232005	0.255626	0.0196252	6	Cu-6
Cu	8-136858333	8	136858333	9.4e-14	1.45e-07	0.434327	0.232005	0.255907	0.0197969	6	Cu-6
Cu	8-136858345	8	136858345	6.25e-08	0.00422997	0.315673	0.232005	0.244528	0.0148066	6	Cu-6
Cu	8-136858354	8	136858354	2.64e-09	0.000469477	0.477373	0.232005	0.247182	0.0152129	6	Cu-6
Cu	8-136858760	8	136858760	4.81e-09	0.00071899	0.483444	0.232005	0.246679	0.0147581	6	Cu-6
Cu	8-136858916	8	136858916	6.46e-09	0.000890358	0.479581	0.232005	0.24643	0.01474	6	Cu-6
Cu	8-136866400	8	136866400	3.7e-10	0.000132301	0.0960265	0.232005	0.248843	0.0281968	6	Cu-6
Cu	8-136866446	8	136866446	2.8e-08	0.00236936	0.43819	0.232005	0.245201	0.0144487	6	Cu-6
Cu	8-136867400	8	136867400	9.76e-07	0.0310025	0.107616	0.232005	0.242242	0.0205106	6	Cu-6
Cu	8-136870736	8	136870736	9.96e-10	0.000274598	0.0971302	0.232005	0.248005	0.0273128	6	Cu-6
Cu	8-136871309	8	136871309	2.8e-09	0.000469477	0.0971302	0.232005	0.247134	0.0266109	6	Cu-6
Cu	8-136872387	8	136872387	7.16e-08	0.00445608	0.120309	0.232005	0.244415	0.021068	6	Cu-6
Cu	8-136877433	8	136877433	3.75e-09	0.000591344	0.10596	0.232005	0.246887	0.0245914	6	Cu-6
Cu	8-136880102	8	136880102	1.02e-06	0.0318779	0.109823	0.232005	0.242205	0.0201875	6	Cu-6
Cu	8-136880666	8	136880666	1.74e-06	0.0465381	0.127483	0.232005	0.241763	0.0178805	6	Cu-6
Cu	8-136883359	8	136883359	3.14e-09	0.000514988	0.167219	0.232005	0.247038	0.0197344	6	Cu-6
Cu	8-136905850	8	136905850	1.62e-09	0.000382078	0.0965784	0.232005	0.247594	0.0270872	6	Cu-6
Cu	8-136919207	8	136919207	1.48e-08	0.00149716	0.0976821	0.232005	0.245734	0.0252073	6	Cu-6
Cu	8-136921090	8	136921090	2.76e-09	0.000469477	0.0965784	0.232005	0.247146	0.0267229	6	Cu-6
Cu	8-136925238	8	136925238	2.07e-09	0.000420203	0.0965784	0.232005	0.247388	0.0268458	6	Cu-6
Cu	8-136926183	8	136926183	2.09e-09	0.000420203	0.0954746	0.232005	0.247379	0.027081	6	Cu-6
Cu	8-136926298	8	136926298	1.65e-08	0.00160933	0.0993377	0.232005	0.245644	0.0247993	6	Cu-6
Cu	8-136934081	8	136934081	2.22e-11	1.43e-05	0.0833333	0.232005	0.251233	0.0300959	6	Cu-6
Cu	8-136943657	8	136943657	6.62e-08	0.00429704	0.0651214	0.232005	0.244479	0.0315032	6	Cu-6
Cu	8-136951112	8	136951112	1.03e-08	0.00120408	0.0971302	0.232005	0.24604	0.0255266	6	Cu-6
Cu	8-136951466	8	136951466	1.08e-06	0.0332708	0.391832	0.232005	0.242157	0.0126208	6	Cu-6
Cu	8-136958197	8	136958197	1.95e-09	0.000420203	0.098234	0.232005	0.247439	0.0265625	6	Cu-6
Cu	8-136959138	8	136959138	6.72e-09	0.000909478	0.0971302	0.232005	0.246397	0.0257058	6	Cu-6
Cu	8-136972808	8	136972808	1.34e-08	0.00144163	0.0684327	0.232005	0.245814	0.0310931	6	Cu-6
Cu	8-137002182	8	137002182	1.75e-06	0.0465381	0.479581	0.232005	0.24176	0.0120504	6	Cu-6
Cu	8-137002483	8	137002483	1.33e-06	0.0391078	0.480132	0.232005	0.241988	0.0121924	6	Cu-6
Cu	8-137017541	8	137017541	2.17e-07	0.0101358	0.0888521	0.232005	0.243492	0.0229849	6	Cu-6
Cu	8-137021437	8	137021437	1.02e-06	0.0318779	0.448124	0.232005	0.242203	0.0124618	6	Cu-6
Cu	8-137022773	8	137022773	4.51e-08	0.00319688	0.0684327	0.232005	0.2448	0.0302436	6	Cu-6
Cu	8-137024124	8	137024124	2.15e-09	0.000420203	0.422737	0.232005	0.247355	0.0151799	6	Cu-6
Cu	8-137024139	8	137024139	7.72e-10	0.000220714	0.0871965	0.232005	0.248221	0.0273537	6	Cu-6
Cu	8-137024400	8	137024400	4.34e-07	0.0170185	0.44426	0.232005	0.242914	0.0127391	6	Cu-6
Cu	8-137024827	8	137024827	3.46e-11	1.92e-05	0.109272	0.232005	0.250853	0.0261866	6	Cu-6
Cu	8-137024895	8	137024895	2.4e-07	0.010837	0.102649	0.232005	0.243406	0.0212369	6	Cu-6
Cu	8-137025826	8	137025826	4.38e-07	0.0170616	0.0811258	0.232005	0.242907	0.0235759	6	Cu-6
Cu	8-137027259	8	137027259	1.04e-08	0.00120408	0.0651214	0.232005	0.246028	0.032915	6	Cu-6
Cu	8-137055241	8	137055241	1.45e-07	0.00726807	0.386865	0.232005	0.243826	0.0135313	6	Cu-6
Cu	8-137064329	8	137064329	8.58e-08	0.00517705	0.0640177	0.232005	0.244263	0.0314044	6	Cu-6
Cu	8-137064731	8	137064731	2.85e-07	0.0124513	0.0656733	0.232005	0.243262	0.0292404	6	Cu-6
Cu	8-137064978	8	137064978	7.49e-08	0.00459931	0.110927	0.232005	0.244377	0.0210973	6	Cu-6
Cu	8-137064994	8	137064994	5.52e-07	0.0200166	0.0673289	0.232005	0.242714	0.0278536	6	Cu-6
Cu	8-137065466	8	137065466	1.71e-06	0.0459049	0.116446	0.232005	0.241778	0.0185523	6	Cu-6
Cu	8-137067309	8	137067309	2.4e-08	0.0022062	0.0640177	0.232005	0.245328	0.0327121	6	Cu-6
Cu	8-137067582	8	137067582	1.49e-06	0.0418477	0.17053	0.232005	0.241895	0.01575	6	Cu-6
Cu	8-137068130	8	137068130	4.53e-07	0.0175583	0.292494	0.232005	0.242879	0.0135759	6	Cu-6
Cu	8-137068135	8	137068135	1.72e-07	0.00825982	0.102649	0.232005	0.243684	0.021849	6	Cu-6
Cu	8-137068172	8	137068172	5.63e-07	0.0202323	0.296909	0.232005	0.242698	0.0140048	6	Cu-6
Cu	8-137069179	8	137069179	1.62e-06	0.0442601	0.112583	0.232005	0.241824	0.0187331	6	Cu-6
Cu	8-137072408	8	137072408	1.24e-07	0.00679234	0.107064	0.232005	0.243956	0.0211057	6	Cu-6
Cu	8-137082863	8	137082863	1.44e-06	0.0411803	0.0783664	0.232005	0.241922	0.0228125	6	Cu-6
Cu	8-137087501	8	137087501	3.58e-08	0.00276434	0.098234	0.232005	0.244994	0.0242886	6	Cu-6
Cu	8-137090189	8	137090189	6.5e-08	0.00429704	0.0634658	0.232005	0.244495	0.0319202	6	Cu-6
Cu	8-137095001	8	137095001	2.42e-07	0.0108782	0.0645695	0.232005	0.243398	0.0296509	6	Cu-6
Cu	8-137096777	8	137096777	1.39e-06	0.0405658	0.0927152	0.232005	0.241948	0.0207736	6	Cu-6
Cu	8-137097916	8	137097916	7.33e-07	0.025025	0.314018	0.232005	0.24248	0.0136884	6	Cu-6
Cu	8-137101139	8	137101139	3.53e-08	0.00276434	0.062362	0.232005	0.245005	0.0282956	6	Cu-6
Cu	8-137102692	8	137102692	1.14e-07	0.00645918	0.0634658	0.232005	0.244028	0.030638	6	Cu-6
Cu	8-137102715	8	137102715	2.49e-08	0.00223959	0.066777	0.232005	0.245296	0.0310017	6	Cu-6
Cu	8-137110481	8	137110481	1.44e-07	0.00726807	0.0645695	0.232005	0.243833	0.0306295	6	Cu-6
Cu	8-137110713	8	137110713	3.1e-07	0.0133024	0.0656733	0.232005	0.243193	0.0293157	6	Cu-6
Cu	8-137110982	8	137110982	1.42e-07	0.00726807	0.066777	0.232005	0.243841	0.0296653	6	Cu-6
Cu	8-137111724	8	137111724	5.37e-07	0.0199263	0.066777	0.232005	0.242737	0.0283369	6	Cu-6
Cu	8-137113051	8	137113051	5.63e-07	0.0202323	0.31457	0.232005	0.242697	0.014038	6	Cu-6
Cu	8-137113879	8	137113879	1.46e-07	0.00728962	0.302428	0.232005	0.243818	0.0144787	6	Cu-6
Cu	8-137121552	8	137121552	1.44e-07	0.00726807	0.0645695	0.232005	0.243833	0.0306295	6	Cu-6
Cu	8-137130173	8	137130173	6.53e-08	0.00429704	0.0695364	0.232005	0.244491	0.0279821	6	Cu-6
Cu	8-137135928	8	137135928	1.17e-07	0.00660558	0.0651214	0.232005	0.244003	0.0305098	6	Cu-6
Cu	8-137154749	8	137154749	5.89e-07	0.0208459	0.066777	0.232005	0.242661	0.0282123	6	Cu-6
Cu	8-137157555	8	137157555	1.42e-07	0.00726807	0.366446	0.232005	0.243844	0.0137065	6	Cu-6
Cu	8-137158065	8	137158065	1.19e-07	0.00663771	0.368102	0.232005	0.243993	0.0135917	6	Cu-6
Cu	8-137158559	8	137158559	6.33e-09	0.000890358	0.102649	0.232005	0.246447	0.0250129	6	Cu-6
Cu	8-137158777	8	137158777	9.04e-08	0.00540629	0.0651214	0.232005	0.24422	0.0308823	6	Cu-6
Cu	8-137158852	8	137158852	7.53e-11	3.88e-05	0.272075	0.232005	0.250192	0.0182365	6	Cu-6
Cu	8-137158854	8	137158854	3.47e-11	1.92e-05	0.275938	0.232005	0.25085	0.0184401	6	Cu-6
Cu	8-137158918	8	137158918	1.01e-08	0.00120408	0.418874	0.232005	0.246058	0.0146803	6	Cu-6
Cu	8-137158919	8	137158919	9.25e-08	0.00545199	0.110375	0.232005	0.2442	0.0216321	6	Cu-6
Cu	8-137158990	8	137158990	4.31e-07	0.0170185	0.365894	0.232005	0.24292	0.0129869	6	Cu-6
Cu	8-137159909	8	137159909	3.95e-08	0.00295889	0.100993	0.232005	0.244912	0.0240183	6	Cu-6
Cu	8-137161932	8	137161932	1.23e-07	0.00679234	0.209161	0.232005	0.24396	0.0163337	6	Cu-6
Cu	8-137161945	8	137161945	2.03e-08	0.00193931	0.215232	0.232005	0.245467	0.0174401	6	Cu-6
Cu	8-137162014	8	137162014	6e-08	0.00409912	0.209713	0.232005	0.244562	0.0168473	6	Cu-6
Cu	8-137162223	8	137162223	5.64e-10	0.000174239	0.199227	0.232005	0.248486	0.0201886	6	Cu-6
Cu	8-137164722	8	137164722	1.44e-07	0.00726807	0.0761589	0.232005	0.243829	0.0264527	6	Cu-6
Cu	8-137164776	8	137164776	5.72e-07	0.0203313	0.0794702	0.232005	0.242686	0.024178	6	Cu-6
Cu	8-137165964	8	137165964	3.8e-07	0.0155998	0.376932	0.232005	0.243025	0.0138237	6	Cu-6
Cu	8-137166878	8	137166878	3.68e-07	0.0153392	0.379691	0.232005	0.243051	0.0137745	6	Cu-6
Cu	8-137167134	8	137167134	8.26e-07	0.0276185	0.0722958	0.232005	0.24238	0.0257087	6	Cu-6
Cu	8-137167202	8	137167202	2.83e-07	0.012395	0.0739514	0.232005	0.24327	0.0264613	6	Cu-6
Cu	8-137167394	8	137167394	5.43e-07	0.0199263	0.380795	0.232005	0.242729	0.0135362	6	Cu-6
Cu	8-137168119	8	137168119	3e-07	0.0129232	0.0656733	0.232005	0.243222	0.0293188	6	Cu-6
Cu	8-137168150	8	137168150	1.05e-08	0.00120408	0.0971302	0.232005	0.246026	0.0255891	6	Cu-6
Cu	8-137168484	8	137168484	1.72e-07	0.00825982	0.0987859	0.232005	0.243682	0.0230282	6	Cu-6
Cu	8-137169360	8	137169360	9.12e-09	0.00119286	0.0706402	0.232005	0.246141	0.0290462	6	Cu-6
Cu	8-137170184	8	137170184	4.05e-07	0.0162691	0.0772627	0.232005	0.242972	0.0244578	6	Cu-6
Cu	8-137171417	8	137171417	1.02e-07	0.00584947	0.0783664	0.232005	0.244123	0.0251201	6	Cu-6
Cu	8-137171547	8	137171547	2.2e-07	0.0102446	0.0778146	0.232005	0.243478	0.0246852	6	Cu-6
Cu	8-137178038	8	137178038	2.3e-07	0.0104944	0.0756071	0.232005	0.243443	0.0251474	6	Cu-6
Cu	8-137178607	8	137178607	1.04e-07	0.0059667	0.0756071	0.232005	0.2441	0.0257419	6	Cu-6
Cu	8-137178909	8	137178909	3.7e-07	0.0153392	0.0717439	0.232005	0.243048	0.0254369	6	Cu-6
Cu	8-137243669	8	137243669	2.7e-09	0.000469477	0.0607064	0.232005	0.247164	0.0328259	6	Cu-6
Cu	8-137262099	8	137262099	1.32e-06	0.0391078	0.0871965	0.232005	0.241996	0.0207102	6	Cu-6
Cu	8-137276327	8	137276327	4.69e-09	0.00071899	0.0711921	0.232005	0.246699	0.0295297	6	Cu-6
Cu	8-137296817	8	137296817	4.31e-08	0.00311642	0.112031	0.232005	0.244838	0.0210811	6	Cu-6
Cu	8-137296871	8	137296871	3.29e-08	0.00267275	0.113687	0.232005	0.245065	0.0211672	6	Cu-6
Cu	8-137297970	8	137297970	2.39e-12	2.05e-06	0.138521	0.232005	0.253131	0.0241317	6	Cu-6
Cu	8-137297979	8	137297979	1.97e-12	1.9e-06	0.140177	0.232005	0.253297	0.0240938	6	Cu-6
Cu	8-137344335	8	137344335	7.23e-13	7.98e-07	0.0772627	0.232005	0.254156	0.0335316	6	Cu-6
Cu	8-137406608	8	137406608	1.33e-06	0.0391078	0.0700883	0.232005	0.241988	0.0260869	6	Cu-6
Cu	8-137413179	8	137413179	2.11e-07	0.00995251	0.484547	0.232005	0.243513	-0.0133155	6	Cu-6
Cu	8-137413209	8	137413209	2.58e-07	0.0113728	0.459161	0.232005	0.243347	-0.0130276	6	Cu-6
Cu	8-137413305	8	137413305	4.61e-07	0.0177267	0.5	0.232005	0.242864	-0.0129708	6	Cu-6
Cu	8-137413344	8	137413344	4.74e-07	0.0181143	0.492826	0.232005	0.242841	-0.0129366	6	Cu-6
Cu	8-137413526	8	137413526	1.56e-07	0.00766643	0.486755	0.232005	0.243765	-0.0134942	6	Cu-6
Cu	8-137413539	8	137413539	1.53e-10	7.37e-05	0.0695364	0.232005	0.249592	0.0327932	6	Cu-6
Cu	8-137413552	8	137413552	1.02e-06	0.0318779	0.485099	0.232005	0.242206	-0.0124777	6	Cu-6
Cu	8-137413671	8	137413671	1.54e-06	0.0426536	0.482892	0.232005	0.241867	-0.0123152	6	Cu-6
Cu	8-137413672	8	137413672	6.32e-07	0.0219736	0.485651	0.232005	0.242602	-0.0127626	6	Cu-6
Cu	8-137413688	8	137413688	5.01e-07	0.01893	0.489514	0.232005	0.242795	-0.0128956	6	Cu-6
Cu	8-137414047	8	137414047	1.84e-06	0.048242	0.481788	0.232005	0.24172	-0.0121141	6	Cu-6
Cu	8-137415182	8	137415182	7.16e-07	0.0247931	0.483444	0.232005	0.242499	-0.0126049	6	Cu-6
Cu	8-137415822	8	137415822	3.04e-08	0.00252379	0.0656733	0.232005	0.245131	0.029066	6	Cu-6
Cu	8-137529458	8	137529458	8.88e-07	0.0291003	0.0965784	0.232005	0.24232	0.0199992	7	Cu-6
Cu	8-137530139	8	137530139	1.53e-06	0.0426536	0.363135	0.232005	0.24187	0.0123638	7	Cu-6
Cu	8-137535145	8	137535145	1.39e-08	0.00147345	0.0695364	0.232005	0.245784	0.0290458	7	Cu-6
Cu	8-137535160	8	137535160	1.52e-06	0.0426153	0.0695364	0.232005	0.241874	0.026085	7	Cu-6
Cu	8-137601267	8	137601267	1.48e-09	0.000369269	0.0700883	0.232005	0.247669	0.0307113	7	Cu-6
Cu	8-137630195	8	137630195	2.79e-10	0.000107666	0.0695364	0.232005	0.249082	0.0321922	7	Cu-6
Cu	8-137630543	8	137630543	1.02e-08	0.00120408	0.0711921	0.232005	0.246045	0.0286498	7	Cu-6
Cu	8-137630915	8	137630915	1.68e-09	0.000382078	0.0695364	0.232005	0.247563	0.030811	7	Cu-6
Cu	8-137683034	8	137683034	2.18e-09	0.000420203	0.0728477	0.232005	0.247346	0.0295866	7	Cu-6
Cu	8-137736795	8	137736795	1.71e-10	7.41e-05	0.0822296	0.232005	0.249496	0.0293058	7	Cu-6
Cu	8-137774880	8	137774880	8.93e-07	0.0291003	0.139073	0.232005	0.242316	0.0170993	7	Cu-6
Cu	8-137775461	8	137775461	3.38e-12	2.37e-06	0.0822296	0.232005	0.252838	0.0320448	7	Cu-6
Cu	8-137791716	8	137791716	1.67e-06	0.0452232	0.0844371	0.232005	0.241799	0.0191786	7	Cu-6
Cu	8-137865654	8	137865654	1.28e-07	0.00695606	0.124172	0.232005	0.243928	0.0196555	7	Cu-6
Cu	8-137865777	8	137865777	3.19e-08	0.00261904	0.122517	0.232005	0.245091	0.0208554	7	Cu-6
Cu	8-137866104	8	137866104	2.35e-07	0.0106923	0.112031	0.232005	0.243422	0.0204708	7	Cu-6
Cu	8-137866269	8	137866269	5.04e-07	0.01893	0.119757	0.232005	0.242789	0.0191491	7	Cu-6
Cu	8-137867518	8	137867518	2.73e-09	0.000469477	0.0960265	0.232005	0.247153	0.0246907	7	Cu-6
Cu	8-137867959	8	137867959	1.18e-09	0.000304796	0.0921634	0.232005	0.247859	0.0259119	7	Cu-6
Cu	8-137868019	8	137868019	2.04e-09	0.000420203	0.11755	0.232005	0.247399	0.023022	7	Cu-6
Cu	8-137868335	8	137868335	3.64e-08	0.00278224	0.444812	0.232005	0.24498	-0.014255	7	Cu-6
Cu	8-137869423	8	137869423	1.31e-07	0.00699167	0.466887	0.232005	0.243913	-0.0139939	7	Cu-6
Cu	8-137869669	8	137869669	2.49e-07	0.0111181	0.468543	0.232005	0.243375	-0.0136609	7	Cu-6
Cu	8-137870112	8	137870112	2.26e-10	9.17e-05	0.0932671	0.232005	0.249262	0.0269917	7	Cu-6
Cu	8-137871141	8	137871141	7.7e-07	0.0260835	0.469647	0.232005	0.242438	-0.0131825	7	Cu-6
Cu	8-137871342	8	137871342	4.55e-10	0.000152738	0.46468	0.232005	0.248668	-0.0164556	7	Cu-6
Cu	8-137872206	8	137872206	2.49e-08	0.00223959	0.116998	0.232005	0.245296	0.0205218	7	Cu-6
Cu	8-137873679	8	137873679	4.58e-08	0.00321177	0.123068	0.232005	0.244788	0.0195019	7	Cu-6
Cu	8-137873737	8	137873737	4.84e-09	0.00071899	0.120309	0.232005	0.246672	0.0211744	7	Cu-6
Cu	8-137874382	8	137874382	7.51e-08	0.00459931	0.121965	0.232005	0.244375	0.0193303	7	Cu-6
Cu	8-137875204	8	137875204	2.6e-08	0.00227972	0.125276	0.232005	0.245262	0.0197663	7	Cu-6
Cu	8-137875233	8	137875233	4.66e-08	0.00323987	0.121413	0.232005	0.244774	0.0196615	7	Cu-6
Cu	8-137876231	8	137876231	9.41e-08	0.00550524	0.124172	0.232005	0.244186	0.0191067	7	Cu-6
Cu	8-137876251	8	137876251	4.79e-07	0.0182163	0.149558	0.232005	0.242832	0.0163966	7	Cu-6
Cu	8-137878067	8	137878067	2.25e-07	0.0103313	0.122517	0.232005	0.243461	0.0185806	7	Cu-6
Cu	8-137878121	8	137878121	2.98e-07	0.0129067	0.124724	0.232005	0.243227	0.0182667	7	Cu-6
Cu	8-137878804	8	137878804	3.95e-07	0.016152	0.130243	0.232005	0.242991	0.0176263	7	Cu-6
Cu	8-137878874	8	137878874	5.05e-07	0.01893	0.137969	0.232005	0.242788	0.0170311	7	Cu-6
Cu	8-137880967	8	137880967	1.73e-10	7.41e-05	0.163355	0.232005	0.249488	0.021351	7	Cu-6
Cu	8-137881629	8	137881629	6.91e-08	0.00437369	0.154525	0.232005	0.244444	0.0177718	7	Cu-6
Cu	8-137882005	8	137882005	3.88e-08	0.00293921	0.15287	0.232005	0.244926	0.0181997	7	Cu-6
Cu	8-137883079	8	137883079	4.11e-07	0.0164426	0.435982	0.232005	0.242959	-0.0127857	7	Cu-6
Cu	8-137883081	8	137883081	1.53e-08	0.00150961	0.434879	0.232005	0.245709	-0.0142746	7	Cu-6
Cu	8-137884018	8	137884018	7.58e-10	0.000220714	0.102097	0.232005	0.248237	0.024316	7	Cu-6
Cu	8-137884891	8	137884891	2.82e-08	0.00236936	0.465784	0.232005	0.245192	-0.0137021	7	Cu-6
Cu	8-137930281	8	137930281	1.1e-08	0.00123593	0.160596	0.232005	0.245979	0.0187057	7	Cu-6
Cu	8-137930445	8	137930445	3.3e-12	2.37e-06	0.114238	0.232005	0.252857	0.0275534	7	Cu-6
Cu	8-137930520	8	137930520	4.84e-10	0.00015564	0.124724	0.232005	0.248616	0.0229634	7	Cu-6
Cu	8-137930545	8	137930545	1.2e-07	0.00664508	0.149007	0.232005	0.243986	0.0179996	7	Cu-6
Cu	8-137930628	8	137930628	8.31e-07	0.0276408	0.15011	0.232005	0.242376	0.0167075	7	Cu-6
Cu	8-137931661	8	137931661	3.54e-08	0.00276434	0.153974	0.232005	0.245003	0.0185094	7	Cu-6
Cu	8-137931687	8	137931687	1.36e-15	5.24e-09	0.484547	0.232005	0.259563	-0.0205597	7	Cu-6
Cu	8-137931958	8	137931958	2.29e-08	0.00215263	0.150662	0.232005	0.245369	0.0190684	7	Cu-6
Cu	8-137932363	8	137932363	2.39e-08	0.0022062	0.152318	0.232005	0.245331	0.0188944	7	Cu-6
Cu	8-137932431	8	137932431	3.77e-10	0.000132301	0.324503	0.232005	0.248827	-0.015848	7	Cu-6
Cu	8-137939692	8	137939692	4.69e-24	3.62e-17	0.260486	0.232005	0.276666	0.0289889	7	Cu-6
Cu	8-137939775	8	137939775	1.51e-07	0.00749284	0.38521	0.232005	0.24379	-0.0131042	7	Cu-6
Cu	8-137940144	8	137940144	3.7e-07	0.0153392	0.232892	0.232005	0.243046	-0.0141996	7	Cu-6
Cu	8-137940246	8	137940246	1.06e-09	0.000280885	0.299669	0.232005	0.247957	-0.0158102	7	Cu-6
Cu	8-137940429	8	137940429	6.59e-08	0.00429704	0.289183	0.232005	0.244484	-0.0142365	7	Cu-6
Cu	8-137942277	8	137942277	1.31e-07	0.00699167	0.183223	0.232005	0.243908	-0.0158991	7	Cu-6
Cu	8-137946959	8	137946959	1.17e-06	0.0354166	0.0745033	0.232005	0.242096	0.0256236	7	Cu-6
Cu	8-138048310	8	138048310	1.35e-06	0.0396472	0.334989	0.232005	0.241974	-0.0148546	7	Cu-6
Cu	8-138088960	8	138088960	4.33e-07	0.0170185	0.397903	0.232005	0.242916	-0.0139662	7	Cu-6
Cu	8-138089621	8	138089621	1.59e-07	0.00773418	0.37362	0.232005	0.243747	-0.0150604	7	Cu-6
Cu	8-138089725	8	138089725	1.45e-06	0.0412808	0.41777	0.232005	0.241915	-0.0128579	7	Cu-6
Cu	8-138090319	8	138090319	9.96e-08	0.00577903	0.369757	0.232005	0.244139	-0.0153962	7	Cu-6
Cu	8-138151750	8	138151750	3.68e-09	0.000591079	0.366446	0.232005	0.246904	-0.0171704	7	Cu-6
Cu	8-138152957	8	138152957	1.13e-08	0.0012491	0.36479	0.232005	0.245958	-0.0167128	7	Cu-6
Cu	8-138152978	8	138152978	8.55e-08	0.00517705	0.383002	0.232005	0.244266	-0.015007	7	Cu-6
Cu	8-138153475	8	138153475	2.68e-08	0.00232531	0.370309	0.232005	0.245236	-0.0161295	7	Cu-6
Cu	8-138153502	8	138153502	5.69e-09	0.000828578	0.378587	0.232005	0.246537	-0.0164968	7	Cu-6
Cu	8-138153799	8	138153799	5.68e-07	0.02029	0.352649	0.232005	0.242691	-0.0141384	7	Cu-6
Cu	8-138154065	8	138154065	1.83e-06	0.048242	0.458057	0.232005	0.241722	-0.0125673	7	Cu-6
Cu	8-138154090	8	138154090	1.49e-08	0.00149716	0.368102	0.232005	0.24573	-0.016473	7	Cu-6
Cu	8-138154098	8	138154098	7.22e-09	0.00096035	0.362031	0.232005	0.246337	-0.0170552	7	Cu-6
Cu	8-138154118	8	138154118	1.49e-08	0.00149716	0.368102	0.232005	0.245726	-0.016491	7	Cu-6
Cu	8-138154210	8	138154210	2.25e-07	0.0103313	0.357064	0.232005	0.243462	-0.0145175	7	Cu-6
Cu	8-138154306	8	138154306	4.44e-08	0.00317437	0.365894	0.232005	0.244814	-0.0159021	7	Cu-6
Cu	8-138154360	8	138154360	1.08e-08	0.00122906	0.380243	0.232005	0.245996	-0.0162546	7	Cu-6
Cu	8-138154407	8	138154407	2.81e-08	0.00236936	0.380243	0.232005	0.245196	-0.0157278	7	Cu-6
Cu	8-138155873	8	138155873	7.06e-08	0.00442972	0.376932	0.232005	0.244426	-0.015506	7	Cu-6
Cu	8-138155939	8	138155939	4.05e-08	0.00300716	0.366446	0.232005	0.24489	-0.0159078	7	Cu-6
Cu	8-138156042	8	138156042	6.78e-08	0.00432658	0.384106	0.232005	0.24446	-0.0151519	7	Cu-6
Cu	8-138156270	8	138156270	1.45e-08	0.00149716	0.364238	0.232005	0.245751	-0.0163288	7	Cu-6
Cu	8-138156436	8	138156436	9.55e-09	0.00120408	0.368653	0.232005	0.246102	-0.0165434	7	Cu-6
Cu	8-138156687	8	138156687	4.32e-08	0.00311642	0.369205	0.232005	0.244837	-0.0158566	7	Cu-6
Cu	8-138156787	8	138156787	6.46e-09	0.000890358	0.369205	0.232005	0.246431	-0.016804	7	Cu-6
Cu	8-138157030	8	138157030	5.12e-08	0.0035309	0.372517	0.232005	0.244694	-0.0156141	7	Cu-6
Cu	8-138157165	8	138157165	1.33e-08	0.00144163	0.36479	0.232005	0.245822	-0.0165413	7	Cu-6
Cu	8-138157261	8	138157261	9.76e-09	0.00120408	0.368653	0.232005	0.246083	-0.0165318	7	Cu-6
Cu	8-138157586	8	138157586	1.38e-07	0.00723777	0.36755	0.232005	0.243868	-0.0152963	7	Cu-6
Cu	8-138158023	8	138158023	1.82e-08	0.00175911	0.363135	0.232005	0.245559	-0.0164808	7	Cu-6
Cu	8-138158719	8	138158719	6.35e-08	0.0042633	0.371413	0.232005	0.244515	-0.015609	7	Cu-6
Cu	8-138161837	8	138161837	9.1e-08	0.00540629	0.468543	0.232005	0.244214	-0.0141666	7	Cu-6
Cu	8-138240783	8	138240783	1.48e-06	0.0418477	0.343267	0.232005	0.241901	-0.0146199	7	Cu-6
Cu	8-138245825	8	138245825	7.25e-07	0.024888	0.341611	0.232005	0.242488	-0.0150953	7	Cu-6
Cu	8-138333531	8	138333531	1.44e-06	0.0411803	0.154525	0.232005	0.241921	0.0169582	7	Cu-6
Cu	8-138334674	8	138334674	1.3e-06	0.0389738	0.137969	0.232005	0.242004	0.0180377	7	Cu-6
Cu	8-138413389	8	138413389	5.44e-07	0.0199263	0.142384	0.232005	0.242727	0.0182407	7	Cu-6
Cu	8-138414222	8	138414222	3.72e-07	0.0153392	0.145143	0.232005	0.243043	0.01813	7	Cu-6
Cu	8-138414267	8	138414267	6.08e-07	0.0212384	0.112031	0.232005	0.242634	0.020974	7	Cu-6
Cu	8-138463302	8	138463302	1.62e-06	0.0442601	0.224062	0.232005	0.241822	0.0139727	7	Cu-6
Cu	8-138463315	8	138463315	1.82e-06	0.048242	0.224614	0.232005	0.241726	0.0139533	7	Cu-6
Cu	8-138660074	8	138660074	4.28e-08	0.00311642	0.401214	0.232005	0.244845	-0.0139627	7	Cu-6
Cu	8-138662559	8	138662559	1.59e-06	0.0437313	0.3234	0.232005	0.241841	-0.0124042	7	Cu-6
Cu	8-138664642	8	138664642	9.62e-07	0.030695	0.321192	0.232005	0.242254	-0.0127347	7	Cu-6
Cu	8-138665782	8	138665782	1.74e-07	0.00827713	0.344371	0.232005	0.243675	-0.0134364	7	Cu-6
Cu	8-138666454	8	138666454	9.41e-07	0.030269	0.316777	0.232005	0.242273	-0.0127769	7	Cu-6
Cu	8-138668842	8	138668842	9.91e-07	0.0313431	0.324503	0.232005	0.24223	-0.0126953	7	Cu-6
Cu	8-138672440	8	138672440	1.35e-07	0.00712747	0.404525	0.232005	0.243887	-0.0145912	7	Cu-6
Cu	8-138672681	8	138672681	1.1e-06	0.0337395	0.325607	0.232005	0.242142	-0.0126242	7	Cu-6
Cu	8-138672754	8	138672754	1.59e-07	0.00773418	0.413907	0.232005	0.243751	-0.0131164	7	Cu-6
Cu	8-138672904	8	138672904	3.57e-07	0.0151383	0.335541	0.232005	0.243076	-0.0130399	7	Cu-6
Cu	8-138672928	8	138672928	6.75e-08	0.00432658	0.410044	0.232005	0.244463	-0.0148618	7	Cu-6
Cu	8-138673034	8	138673034	1.56e-06	0.0431231	0.486203	0.232005	0.241855	-0.0122108	7	Cu-6
Cu	8-138673054	8	138673054	4.03e-07	0.0162691	0.442053	0.232005	0.242976	-0.0127697	7	Cu-6
Cu	8-138673192	8	138673192	3.54e-08	0.00276434	0.46468	0.232005	0.245003	-0.013931	7	Cu-6
Cu	8-138673194	8	138673194	5.45e-07	0.0199263	0.322848	0.232005	0.242726	-0.0130223	7	Cu-6
Cu	8-138673277	8	138673277	5.5e-07	0.0200166	0.485651	0.232005	0.242718	-0.0127706	7	Cu-6
Cu	8-138673304	8	138673304	2.11e-07	0.00995251	0.491722	0.232005	0.243512	-0.0131633	7	Cu-6
Cu	8-138824634	8	138824634	8.42e-07	0.0279069	0.481236	0.232005	0.242364	-0.0126377	7	Cu-6
Cu	8-140018993	8	140018993	6e-07	0.0210401	0.209161	0.232005	0.242646	0.0146938	8	Cu-6
Cu	8-140139705	8	140139705	1.23e-06	0.037042	0.268764	0.232005	0.242052	0.0133883	8	Cu-6
Cu	8-140235922	8	140235922	1.41e-06	0.0408987	0.0855408	0.232005	0.241935	0.0229604	8	Cu-6
Cu	8-166045349	8	166045349	1.68e-06	0.0454489	0.275386	0.232005	0.241792	0.0132808	9
Cu	8-166045397	8	166045397	1.43e-06	0.0411223	0.160044	0.232005	0.241928	0.0152439	9
Cu	8-166045399	8	166045399	1.15e-06	0.035242	0.150662	0.232005	0.242103	0.0157794	9
Cu	8-166046028	8	166046028	1.88e-06	0.0489158	0.285872	0.232005	0.241702	0.0131673	9
Cu	8-166046093	8	166046093	1.71e-06	0.0459049	0.283113	0.232005	0.241778	0.0132892	9
Cu	8-166046516	8	166046516	9.03e-07	0.0292925	0.280353	0.232005	0.242307	0.0136967	9
Cu	8-166046631	8	166046631	8.91e-07	0.0291003	0.295254	0.232005	0.242318	0.0133051	9
Cu	8-166046641	8	166046641	1.29e-06	0.0386805	0.297461	0.232005	0.242013	0.0131185	9
Cu	8-166046642	8	166046642	4.14e-07	0.0164784	0.269316	0.232005	0.242953	0.0143525	9
Cu	8-166047045	8	166047045	7.81e-07	0.026216	0.277594	0.232005	0.242427	0.0138445	9
Cu	9-147476744	9	147476744	7.76e-07	0.026156	0.112583	0.232005	0.242432	-0.0216449
Cu	9-148598135	9	148598135	7.22e-07	0.0248661	0.0899559	0.232005	0.242493	-0.023937
Cu	10-79217275	10	79217275	4.62e-07	0.0177267	0.190949	0.232005	0.242863	-0.0150575
Cu	10-134477147	10	134477147	1.4e-06	0.0407634	0.0816777	0.232005	0.241941	0.0202354
Mn	1-13074862	1	13074862	4.57e-07	0.0349234	0.377483	0.230106	0.240999	-0.030002
Mn	1-162874974	1	162874974	2.6e-07	0.0203058	0.105408	0.230106	0.241467	0.0721629	10
Mn	1-162958418	1	162958418	1.09e-10	6.49e-05	0.190397	0.230106	0.248022	0.0556005	10	Mn-2
Mn	1-162958613	1	162958613	3.18e-10	8.77e-05	0.195916	0.230106	0.247114	0.0530134	10	Mn-2
Mn	1-162958647	1	162958647	8.32e-11	6.02e-05	0.194812	0.230106	0.248253	0.0549451	10	Mn-2
Mn	1-162959549	1	162959549	7.48e-11	6.02e-05	0.189845	0.230106	0.248345	0.0562461	10	Mn-2
Mn	1-162961136	1	162961136	3e-11	6e-05	0.191501	0.230106	0.249123	0.0570989	10	Mn-2
Mn	1-162961585	1	162961585	1.2e-10	6.59e-05	0.192053	0.230106	0.247945	0.055256	10	Mn-2
Mn	1-162961586	1	162961586	5.65e-08	0.00513051	0.224062	0.230106	0.242745	0.042352	10	Mn-2
Mn	1-162961720	1	162961720	1.84e-11	6e-05	0.192605	0.230106	0.249541	0.0575993	10	Mn-2
Mn	1-162962816	1	162962816	8.54e-11	6.02e-05	0.19426	0.230106	0.248231	0.055199	10	Mn-2
Mn	1-162962818	1	162962818	3.61e-12	2.79e-05	0.195364	0.230106	0.250931	0.0584797	10	Mn-2
Mn	1-162962857	1	162962857	5.62e-10	0.000124057	0.198675	0.230106	0.24663	0.0517965	10	Mn-2
Mn	1-162962892	1	162962892	4.74e-10	0.000116153	0.191501	0.230106	0.246774	0.053039	10	Mn-2
Mn	1-162962895	1	162962895	2.8e-09	0.000393493	0.200883	0.230106	0.245271	0.0491352	10	Mn-2
Mn	1-162962926	1	162962926	3.02e-10	8.77e-05	0.193157	0.230106	0.247156	0.0536047	10	Mn-2
Mn	1-162963057	1	162963057	1.45e-09	0.000252764	0.196468	0.230106	0.245828	0.0510193	10	Mn-2
Mn	1-162963185	1	162963185	4.46e-11	6.02e-05	0.191501	0.230106	0.248785	0.0565329	10	Mn-2
Mn	1-162963264	1	162963264	3.15e-10	8.77e-05	0.198675	0.230106	0.247121	0.0527714	10	Mn-2
Mn	1-162963301	1	162963301	9.51e-09	0.00118353	0.220751	0.230106	0.244241	0.0455701	10	Mn-2
Mn	1-162963479	1	162963479	2.79e-10	8.77e-05	0.193157	0.230106	0.247224	0.0539358	10	Mn-2
Mn	1-162963973	1	162963973	3.18e-10	8.77e-05	0.192605	0.230106	0.247113	0.0539405	10	Mn-2
Mn	1-162964771	1	162964771	5.27e-10	0.00011955	0.220199	0.230106	0.246686	0.0482392	10	Mn-2
Mn	1-162964934	1	162964934	1.88e-08	0.00204157	0.20585	0.230106	0.243669	0.0452302	10	Mn-2
Mn	1-162964939	1	162964939	5e-07	0.0375064	0.215232	0.230106	0.240923	0.0392126	10	Mn-2
Mn	1-162964947	1	162964947	2.98e-10	8.77e-05	0.203642	0.230106	0.247169	0.0515605	10	Mn-2
Mn	1-162965238	1	162965238	4.04e-09	0.000537814	0.20585	0.230106	0.244962	0.0484146	10	Mn-2
Mn	1-162965326	1	162965326	3.6e-10	9.26e-05	0.202539	0.230106	0.247009	0.0518409	10	Mn-2
Mn	1-162965400	1	162965400	1.06e-08	0.00129086	0.222406	0.230106	0.244148	0.045357	10	Mn-2
Mn	1-162965401	1	162965401	2.23e-10	8.2e-05	0.194812	0.230106	0.247415	0.054048	10	Mn-2
Mn	1-162965434	1	162965434	2.61e-08	0.00261386	0.22351	0.230106	0.243393	0.0441241	10	Mn-2
Mn	1-162965435	1	162965435	1.25e-09	0.000230899	0.204194	0.230106	0.245953	0.0496232	10	Mn-2
Mn	1-162965686	1	162965686	1.77e-09	0.000279419	0.199779	0.230106	0.245658	0.0501575	10	Mn-2
Mn	1-162965694	1	162965694	5.14e-08	0.00472814	0.216336	0.230106	0.242823	0.0438832	10	Mn-2
Mn	1-162965714	1	162965714	3.44e-10	9.15e-05	0.209161	0.230106	0.247048	0.0508133	10	Mn-2
Mn	1-162965733	1	162965733	1.78e-07	0.0148777	0.222406	0.230106	0.241787	0.0403131	10	Mn-2
Mn	1-162965912	1	162965912	1.67e-09	0.00027258	0.221854	0.230106	0.24571	0.046299	10	Mn-2
Mn	1-162965945	1	162965945	2.73e-09	0.000393493	0.197572	0.230106	0.245293	0.0501675	10	Mn-2
Mn	1-162965956	1	162965956	2.88e-08	0.00284651	0.243377	0.230106	0.243311	0.0412534	10	Mn-2
Mn	1-162965962	1	162965962	1.43e-09	0.000252764	0.217439	0.230106	0.245839	0.0471924	10	Mn-2
Mn	1-162965981	1	162965981	1.07e-08	0.00129086	0.227373	0.230106	0.244141	0.0427876	10	Mn-2
Mn	1-162989048	1	162989048	1.6e-09	0.000268896	0.200331	0.230106	0.245744	0.0500885	10	Mn-2
Mn	1-162989113	1	162989113	1.37e-10	7.05e-05	0.192053	0.230106	0.247829	0.0550895	10	Mn-2
Mn	1-162989143	1	162989143	1.92e-10	7.93e-05	0.191501	0.230106	0.247543	0.0546136	10	Mn-2
Mn	1-162989209	1	162989209	1.22e-09	0.000230899	0.198675	0.230106	0.245973	0.0512843	10	Mn-2
Mn	1-162989227	1	162989227	6.46e-10	0.000134829	0.206954	0.230106	0.246512	0.0508704	10	Mn-2
Mn	1-162989238	1	162989238	1.69e-09	0.00027258	0.210817	0.230106	0.245696	0.0485003	10	Mn-2
Mn	1-162989262	1	162989262	5.4e-11	6.02e-05	0.206954	0.230106	0.248621	0.0541615	10	Mn-2
Mn	1-162989311	1	162989311	8.58e-11	6.02e-05	0.190949	0.230106	0.248227	0.0558394	10	Mn-2
Mn	1-162989574	1	162989574	1.01e-10	6.47e-05	0.191501	0.230106	0.248092	0.0553104	10	Mn-2
Mn	1-162990422	1	162990422	1.95e-10	7.93e-05	0.19426	0.230106	0.247528	0.0539702	10	Mn-2
Mn	1-162990706	1	162990706	2.79e-09	0.000393493	0.219095	0.230106	0.245275	0.0473386	10	Mn-2
Mn	1-162990732	1	162990732	3.11e-11	6e-05	0.193157	0.230106	0.249092	0.0564511	10	Mn-2
Mn	1-162990782	1	162990782	3.06e-09	0.000414745	0.193157	0.230106	0.245196	0.0504049	10	Mn-2
Mn	1-162990829	1	162990829	2.97e-09	0.000409094	0.196468	0.230106	0.245223	0.0496246	10	Mn-2
Mn	1-162991025	1	162991025	2.78e-10	8.77e-05	0.194812	0.230106	0.247229	0.053398	10	Mn-2
Mn	1-162991170	1	162991170	1.17e-09	0.000230899	0.199779	0.230106	0.246012	0.0498858	10	Mn-2
Mn	1-162991213	1	162991213	2.09e-10	8.07e-05	0.199779	0.230106	0.247469	0.0525411	10	Mn-2
Mn	1-162991232	1	162991232	4.79e-07	0.036228	0.337196	0.230106	0.24096	0.0343198	10	Mn-2
Mn	1-162991259	1	162991259	7.59e-11	6.02e-05	0.200883	0.230106	0.248331	0.0538464	10	Mn-2
Mn	1-162991605	1	162991605	2.2e-09	0.000332668	0.20585	0.230106	0.245476	0.0493197	10	Mn-2
Mn	1-162991685	1	162991685	1.46e-10	7.07e-05	0.192605	0.230106	0.247772	0.0548535	10	Mn-2
Mn	1-162991723	1	162991723	1.26e-09	0.000230899	0.193709	0.230106	0.245949	0.0518004	10	Mn-2
Mn	1-162991727	1	162991727	2.3e-09	0.000341536	0.183775	0.230106	0.245438	0.0521807	10	Mn-2
Mn	1-163006491	1	163006491	6.12e-10	0.000131147	0.190949	0.230106	0.246559	0.0531333	10	Mn-2
Mn	1-163006922	1	163006922	5.16e-10	0.00011955	0.192605	0.230106	0.246704	0.0531579	10	Mn-2
Mn	1-163006944	1	163006944	4.81e-10	0.000116153	0.191501	0.230106	0.246762	0.0533988	10	Mn-2
Mn	1-163007019	1	163007019	2.16e-09	0.000332668	0.19702	0.230106	0.245491	0.0496477	10	Mn-2
Mn	1-163007958	1	163007958	1.74e-10	7.89e-05	0.19426	0.230106	0.247627	0.0546455	10	Mn-2
Mn	1-163008750	1	163008750	5.73e-09	0.000749731	0.129691	0.230106	0.244668	0.0640667	10	Mn-2
Mn	1-163009133	1	163009133	1.27e-07	0.0109954	0.136313	0.230106	0.242068	0.0544263	10	Mn-2
Mn	1-163022964	1	163022964	2.48e-07	0.0195327	0.13521	0.230106	0.241508	0.0539639	10	Mn-2
Mn	1-163035918	1	163035918	2.51e-08	0.00255709	0.129691	0.230106	0.243424	0.0618921	10	Mn-2
Mn	1-163035953	1	163035953	2.44e-07	0.0195327	0.135762	0.230106	0.241521	0.0548158	10	Mn-2
Mn	1-163036349	1	163036349	6.49e-08	0.00583002	0.133554	0.230106	0.242628	0.0580685	10	Mn-2
Mn	1-163053755	1	163053755	2.04e-07	0.0167548	0.159492	0.230106	0.241671	0.0486262	10	Mn-2
Mn	1-163059123	1	163059123	2.5e-08	0.00255709	0.128035	0.230106	0.243427	0.0625667	10	Mn-2
Mn	1-163059358	1	163059358	1.45e-07	0.012415	0.363135	0.230106	0.241957	0.0354436	10	Mn-2
Mn	1-163059399	1	163059399	1.61e-08	0.00185163	0.128587	0.230106	0.243799	0.0633456	10	Mn-2
Mn	1-163074706	1	163074706	2.11e-08	0.00225795	0.124724	0.230106	0.243572	0.0634193	10	Mn-2
Mn	1-163074735	1	163074735	1.85e-08	0.00204157	0.123068	0.230106	0.243679	0.0645292	10	Mn-2
Mn	1-163075130	1	163075130	2.52e-08	0.00255709	0.123068	0.230106	0.243422	0.0637503	10	Mn-2
Mn	1-163075276	1	163075276	1.7e-08	0.00192768	0.124724	0.230106	0.243753	0.0636702	10	Mn-2
Mn	1-163076600	1	163076600	4.05e-08	0.00388195	0.130795	0.230106	0.243023	0.0600555	10	Mn-2
Mn	1-163076791	1	163076791	1.21e-07	0.0105756	0.137969	0.230106	0.24211	0.0554332	10	Mn-2
Mn	1-163076795	1	163076795	1.58e-07	0.0134311	0.140728	0.230106	0.241883	0.0537674	10	Mn-2
Mn	1-163076906	1	163076906	7.51e-09	0.000963046	0.129691	0.230106	0.24444	0.0636997	10	Mn-2
Mn	1-163076926	1	163076926	2.52e-08	0.00255709	0.130795	0.230106	0.243423	0.0612037	10	Mn-2
Mn	1-163077008	1	163077008	2.96e-08	0.00289647	0.131347	0.230106	0.243285	0.0603364	10	Mn-2
Mn	1-163077067	1	163077067	4.07e-08	0.00388195	0.131898	0.230106	0.243019	0.059658	10	Mn-2
Mn	1-163077068	1	163077068	4.41e-08	0.00410307	0.131347	0.230106	0.242952	0.0595158	10	Mn-2
Mn	1-163077197	1	163077197	4.19e-08	0.00394044	0.142936	0.230106	0.242996	0.0563037	10	Mn-2
Mn	1-163077557	1	163077557	6.09e-07	0.0448109	0.374172	0.230106	0.24076	0.0338525	10	Mn-2
Mn	1-163077591	1	163077591	7.61e-09	0.000963046	0.130243	0.230106	0.244429	0.06328	10	Mn-2
Mn	1-163077592	1	163077592	1.42e-08	0.0016899	0.134658	0.230106	0.243902	0.0609079	10	Mn-2
Mn	1-163077646	1	163077646	1.47e-09	0.000252764	0.129139	0.230106	0.245815	0.0674489	10	Mn-2
Mn	1-163077732	1	163077732	9.37e-10	0.000190269	0.129691	0.230106	0.246198	0.0686562	10	Mn-2
Mn	1-163079382	1	163079382	2.79e-07	0.0215444	0.365342	0.230106	0.24141	0.0348788	10	Mn-2
Mn	1-163079400	1	163079400	2.46e-07	0.0195327	0.363135	0.230106	0.241515	0.0350446	10	Mn-2
Mn	1-163079596	1	163079596	1.58e-08	0.00184874	0.127483	0.230106	0.243813	0.0638321	10	Mn-2
Mn	1-163151736	1	163151736	7.85e-08	0.00696537	0.129139	0.230106	0.242469	0.0598481	10	Mn-2
Mn	1-163152016	1	163152016	1.73e-08	0.00193345	0.125828	0.230106	0.243738	0.0639688	10	Mn-2
Mn	1-163156799	1	163156799	6.48e-07	0.0471794	0.376932	0.230106	0.240709	0.0333708	10	Mn-2
Mn	1-163157747	1	163157747	1.79e-07	0.0148777	0.410596	0.230106	0.241779	0.0342091	10	Mn-2
Mn	3-184559931	3	184559931	2.11e-07	0.017148	0.134658	0.230106	0.241643	0.0471262	11	Mn-6
Mn	3-184590243	3	184590243	5.46e-07	0.0405076	0.12638	0.230106	0.240851	0.0480096	11	Mn-6
Mo	1-246528131	1	246528131	9.81e-07	0.0218141	0.234547	0.232707	0.242931	-0.0162204	12
Mo	1-246528150	1	246528150	2.5e-06	0.0475809	0.232892	0.232707	0.24216	-0.0156953	12
Mo	1-246529219	1	246529219	1.47e-06	0.0304725	0.238962	0.232707	0.242595	-0.0157683	12
Mo	1-246551241	1	246551241	2e-06	0.0393372	0.324503	0.232707	0.242344	-0.0143041	12
Mo	1-246551502	1	246551502	2.63e-06	0.0493027	0.312914	0.232707	0.242117	-0.0143497	12
Mo	1-246555619	1	246555619	1.43e-06	0.0297766	0.212472	0.232707	0.242621	-0.0167492	12
Mo	1-246557786	1	246557786	2.63e-06	0.0493027	0.229581	0.232707	0.242118	-0.0158977	12
Mo	1-246641842	1	246641842	3.88e-07	0.0102468	0.145695	0.232707	0.2437	-0.0215671	12
Mo	1-246651942	1	246651942	3.85e-07	0.0102008	0.146799	0.232707	0.243707	-0.0214547	12
Mo	1-246657972	1	246657972	4.93e-07	0.0123577	0.142936	0.232707	0.243501	-0.0215323	12
Mo	1-246660721	1	246660721	2.67e-06	0.0496256	0.146247	0.232707	0.242106	-0.0198894	12
Mo	1-246871053	1	246871053	2.29e-06	0.0447299	0.239514	0.232707	0.24223	-0.0156945	12
Mo	1-246921374	1	246921374	8.94e-08	0.00278154	0.124172	0.232707	0.244921	-0.0247533	12
Mo	1-247008536	1	247008536	7.4e-07	0.0172097	0.113687	0.232707	0.243164	-0.0244963	12
Mo	1-247114295	1	247114295	1.18e-06	0.0255146	0.309051	0.232707	0.242776	-0.0148665	12
Mo	1-247114296	1	247114296	2.52e-06	0.0479028	0.131347	0.232707	0.242151	-0.0215841	12
Mo	1-247214940	1	247214940	7.19e-07	0.0168717	0.113135	0.232707	0.243188	-0.0240904	12
Mo	1-247265557	1	247265557	6.45e-07	0.0154755	0.106512	0.232707	0.243277	-0.0249649	12
Mo	1-247271739	1	247271739	4.97e-07	0.0124138	0.104857	0.232707	0.243494	-0.025598	12
Mo	1-247284351	1	247284351	1.16e-06	0.0253721	0.114238	0.232707	0.242791	-0.0237694	12
Mo	1-247329324	1	247329324	2.48e-06	0.0475809	0.190949	0.232707	0.242166	-0.0162386	12
Mo	1-247331219	1	247331219	4.24e-07	0.0109859	0.456402	0.232707	0.243626	-0.0141549	12
Mo	1-247331498	1	247331498	9.1e-07	0.0205495	0.261038	0.232707	0.242993	-0.0155338	12
Mo	1-247331934	1	247331934	2.13e-07	0.00603264	0.44426	0.232707	0.244196	-0.0145945	12
Mo	1-247332059	1	247332059	1.6e-06	0.0327045	0.258278	0.232707	0.242526	-0.0153173	12
Mo	1-247332095	1	247332095	1.84e-06	0.0367211	0.458609	0.232707	0.242413	-0.0133096	12
Mo	1-247333067	1	247333067	2.36e-09	9.44e-05	0.143488	0.232707	0.247966	-0.0268058	12
Mo	1-247335157	1	247335157	3.05e-11	1.87e-06	0.186534	0.232707	0.251645	-0.0249349	12
Mo	1-247335318	1	247335318	4.71e-07	0.0118817	0.225717	0.232707	0.243539	-0.0172617	12
Mo	1-247337148	1	247337148	1.73e-06	0.0347508	0.298565	0.232707	0.242463	-0.0146822	12
Mo	1-247337222	1	247337222	1.78e-08	0.000624323	0.187638	0.232707	0.246269	-0.0212081	12
Mo	1-247354442	1	247354442	1.27e-08	0.000452519	0.19702	0.232707	0.246554	-0.0207451	12
Mo	1-247354666	1	247354666	1.34e-09	5.61e-05	0.178808	0.232707	0.248445	-0.0236157	12
Mo	1-247356735	1	247356735	1.36e-09	5.64e-05	0.190949	0.232707	0.248431	-0.0226311	12
Mo	1-247358519	1	247358519	4.81e-09	0.000182862	0.203642	0.232707	0.247367	-0.020949	12
Mo	1-247362973	1	247362973	4.4e-10	2.02e-05	0.1766	0.232707	0.249383	-0.0245868	12
Mo	1-247367829	1	247367829	4.33e-10	2e-05	0.17936	0.232707	0.249397	-0.0243648	12
Mo	1-247372171	1	247372171	1.32e-10	7.06e-06	0.192053	0.232707	0.250404	-0.0241159	12
Mo	1-247374153	1	247374153	4.22e-10	1.97e-05	0.190397	0.232707	0.249419	-0.0236292	12
Mo	1-247379660	1	247379660	7.81e-10	3.43e-05	0.218543	0.232707	0.248898	-0.0210324	12
Mo	1-247383734	1	247383734	3.04e-09	0.000119001	0.210265	0.232707	0.247754	-0.0208922	12
Mo	1-247390601	1	247390601	1.54e-10	7.97e-06	0.18819	0.232707	0.250272	-0.0243517	12
Mo	1-247399301	1	247399301	1.01e-09	4.35e-05	0.17936	0.232707	0.248678	-0.0238314	12
Mo	1-247422774	1	247422774	1.61e-06	0.0327885	0.215232	0.232707	0.24252	-0.0167197	12
Mo	1-247425609	1	247425609	6.78e-10	3.03e-05	0.179912	0.232707	0.249018	-0.0240303	12
Mo	1-247444463	1	247444463	9.49e-11	5.23e-06	0.17936	0.232707	0.250682	-0.0252765	12
Mo	1-247455861	1	247455861	7.95e-08	0.00250501	0.194812	0.232707	0.245018	-0.0199799	12
Mo	1-247459511	1	247459511	1.38e-10	7.29e-06	0.178808	0.232707	0.250367	-0.0252566	12
Mo	1-247468922	1	247468922	3.56e-11	2.17e-06	0.178808	0.232707	0.251513	-0.0260409	12
Mo	1-247501338	1	247501338	3.1e-08	0.00105273	0.286424	0.232707	0.245806	-0.0174232	12
Mo	1-247507611	1	247507611	5.49e-11	3.23e-06	0.208057	0.232707	0.251146	-0.0233775	12
Mo	1-247511459	1	247511459	7.92e-11	4.53e-06	0.1766	0.232707	0.250835	-0.0257086	12
Mo	1-247522878	1	247522878	2.09e-10	1.05e-05	0.175497	0.232707	0.250014	-0.02527	12
Mo	1-247525336	1	247525336	5.43e-10	2.48e-05	0.176049	0.232707	0.249206	-0.0246248	12
Mo	1-247529658	1	247529658	4.18e-08	0.0014159	0.171634	0.232707	0.245554	-0.0216614	12
Mo	1-247571917	1	247571917	8.88e-08	0.00277454	0.200883	0.232707	0.244926	-0.0192409	12	Mo-2
Mo	1-247571926	1	247571926	2.87e-10	1.41e-05	0.186534	0.232707	0.249745	-0.023461	12	Mo-2
Mo	1-247624342	1	247624342	1.65e-06	0.0332917	0.158389	0.232707	0.242503	-0.0199543	12	Mo-2
Mo	1-247677110	1	247677110	3.35e-09	0.000129183	0.155629	0.232707	0.247672	-0.0252766	12	Mo-2
Mo	1-247716647	1	247716647	1.13e-08	0.000407834	0.174945	0.232707	0.246653	-0.0228313	12	Mo-2
Mo	1-247719688	1	247719688	1.1e-08	0.000401759	0.177152	0.232707	0.24667	-0.0226047	12	Mo-2
Mo	1-247725290	1	247725290	5.16e-07	0.0128489	0.0960265	0.232707	0.243463	-0.0280766	12	Mo-2
Mo	1-247726382	1	247726382	2.21e-07	0.00623042	0.253863	0.232707	0.244166	-0.0172532	12	Mo-2
Mo	1-247744724	1	247744724	1.11e-07	0.00342396	0.182119	0.232707	0.244737	-0.0205884	12	Mo-2
Mo	1-247765666	1	247765666	1.72e-08	0.000607733	0.184879	0.232707	0.246296	-0.021741	12	Mo-2
Mo	1-247770530	1	247770530	5.92e-09	0.000222003	0.18543	0.232707	0.247192	-0.0225261	12	Mo-2
Mo	1-247780502	1	247780502	7.13e-08	0.00228492	0.184327	0.232707	0.245109	-0.0208515	12	Mo-2
Mo	1-247784216	1	247784216	2.87e-08	0.00098535	0.187638	0.232707	0.245869	-0.0212759	12	Mo-2
Mo	1-247787993	1	247787993	1.24e-07	0.0037944	0.181567	0.232707	0.244649	-0.0207205	12	Mo-2
Mo	1-247798679	1	247798679	1.36e-07	0.00411092	0.181015	0.232707	0.244572	-0.0207795	12	Mo-2
Mo	1-247845215	1	247845215	4.77e-08	0.00158102	0.182671	0.232707	0.245444	-0.0215092	12	Mo-2
Mo	1-247989958	1	247989958	2.48e-07	0.00692737	0.227925	0.232707	0.244072	-0.0172261	12	Mo-2
Mo	1-248026526	1	248026526	4.28e-07	0.0110625	0.412252	0.232707	0.243617	-0.0146692	12	Mo-2
Mo	1-248114723	1	248114723	8.66e-09	0.000323047	0.450883	0.232707	0.246873	-0.0174883	12	Mo-2
Mo	1-248117257	1	248117257	1.49e-07	0.00444837	0.0822296	0.232707	0.244497	-0.0304632	12	Mo-2
Mo	1-248184693	1	248184693	1.45e-06	0.0301915	0.187638	0.232707	0.242606	-0.0176394	12	Mo-2
Mo	1-248189708	1	248189708	2.66e-06	0.0496256	0.191501	0.232707	0.242107	-0.0170049	12	Mo-2
Mo	1-248248534	1	248248534	2.61e-06	0.0491998	0.370861	0.232707	0.242125	-0.0140589	12	Mo-2
Mo	1-248287102	1	248287102	2.66e-06	0.0496256	0.195916	0.232707	0.242108	-0.0167564	12	Mo-2
Mo	1-248293214	1	248293214	7.18e-07	0.0168717	0.201435	0.232707	0.243189	-0.0174019	12	Mo-2
Mo	1-248294416	1	248294416	1.66e-07	0.0048661	0.199779	0.232707	0.244403	-0.0185011	12	Mo-2
Mo	1-248297739	1	248297739	9.54e-07	0.021356	0.200331	0.232707	0.242954	-0.0172549	12	Mo-2
Mo	1-248323377	1	248323377	4.41e-07	0.0113097	0.198675	0.232707	0.243593	-0.0177896	12	Mo-2
Mo	1-248396017	1	248396017	1.53e-07	0.00454059	0.181015	0.232707	0.244474	-0.0190385	12	Mo-2
Mo	1-248398559	1	248398559	5.84e-08	0.00189273	0.182119	0.232707	0.245276	-0.0198369	12	Mo-2
Mo	1-248399459	1	248399459	7.69e-08	0.00244553	0.189845	0.232707	0.245046	-0.0191894	12	Mo-2
Mo	1-248402190	1	248402190	2.91e-08	0.000994834	0.184327	0.232707	0.245857	-0.0201176	12	Mo-2
Mo	1-248402209	1	248402209	7.37e-07	0.0171911	0.30298	0.232707	0.243168	-0.0147246	12	Mo-2
Mo	1-248437890	1	248437890	7.77e-08	0.00245694	0.181015	0.232707	0.245038	-0.0197125	12	Mo-2
Mo	1-248446267	1	248446267	5.46e-08	0.00177779	0.193157	0.232707	0.245332	-0.0192394	12	Mo-2
Mo	1-248523589	1	248523589	2.89e-07	0.00793778	0.412252	0.232707	0.243944	-0.0152312	12	Mo-2
Mo	1-248570531	1	248570531	1.92e-06	0.0379727	0.43543	0.232707	0.242377	-0.0139348	12	Mo-2
Mo	1-248571438	1	248571438	2.11e-06	0.0412816	0.374724	0.232707	0.2423	-0.0140906	12	Mo-2
Mo	1-248655297	1	248655297	1.1e-14	2.08e-09	0.184879	0.232707	0.25843	-0.0302474	12	Mo-2
Mo	1-248663833	1	248663833	1.35e-14	2.49e-09	0.187086	0.232707	0.258254	-0.0300498	12	Mo-2
Mo	1-248665023	1	248665023	3.79e-07	0.0100832	0.378587	0.232707	0.243719	-0.0160604	12	Mo-2
Mo	1-248666772	1	248666772	2.01e-14	3.3e-09	0.187638	0.232707	0.257914	-0.0297479	12	Mo-2
Mo	1-248666938	1	248666938	6.11e-07	0.0148384	0.419426	0.232707	0.243323	-0.0147814	12	Mo-2
Mo	1-248670922	1	248670922	7.85e-15	1.59e-09	0.211921	0.232707	0.258725	-0.0279501	12	Mo-2
Mo	1-248671915	1	248671915	6.08e-22	6.57e-16	0.417219	0.232707	0.273018	-0.0284758	12	Mo-2
Mo	1-248671977	1	248671977	7.05e-22	6.57e-16	0.418874	0.232707	0.272887	-0.0284047	12	Mo-2
Mo	1-248672436	1	248672436	2.57e-11	1.61e-06	0.197572	0.232707	0.251791	-0.024266	12	Mo-2
Mo	1-248672450	1	248672450	3.49e-21	2.45e-15	0.434879	0.232707	0.271478	-0.0277908	12	Mo-2
Mo	1-248672476	1	248672476	9.29e-17	2.56e-11	0.200883	0.232707	0.262565	-0.0310941	12	Mo-2
Mo	1-248672477	1	248672477	1.55e-20	8.54e-15	0.440397	0.232707	0.270166	-0.0272404	12	Mo-2
Mo	1-248672567	1	248672567	1.08e-20	6.96e-15	0.426049	0.232707	0.270481	-0.0274794	12	Mo-2
Mo	1-248672716	1	248672716	5.58e-24	4.31e-17	0.379691	0.232707	0.277172	-0.0304351	12	Mo-2
Mo	1-248672738	1	248672738	3.13e-23	6.03e-17	0.435982	0.232707	0.275643	-0.0291737	12	Mo-2
Mo	1-248672873	1	248672873	7.66e-22	6.57e-16	0.250552	0.232707	0.272814	-0.0324432	12	Mo-2
Mo	1-248673067	1	248673067	5.19e-17	1.54e-11	0.332781	0.232707	0.263071	-0.0256631	12	Mo-2
Mo	1-248673069	1	248673069	4.54e-22	5.84e-16	0.461369	0.232707	0.273276	-0.0282585	12	Mo-2
Mo	1-248673097	1	248673097	1.31e-23	5.05e-17	0.445916	0.232707	0.276415	-0.0292665	12	Mo-2
Mo	1-248673378	1	248673378	2.25e-20	1.08e-14	0.252208	0.232707	0.269839	-0.0310955	12	Mo-2
Mo	1-248673432	1	248673432	2.41e-23	6.03e-17	0.376932	0.232707	0.275872	-0.0299763	12	Mo-2
Mo	1-248673442	1	248673442	7.63e-18	2.95e-12	0.464128	0.232707	0.264739	-0.0250974	12	Mo-2
Mo	1-248673601	1	248673601	1.01e-19	4.11e-14	0.26766	0.232707	0.268519	-0.0299189	12	Mo-2
Mo	1-248673645	1	248673645	1.04e-22	1.6e-16	0.463576	0.232707	0.27458	-0.028811	12	Mo-2
Mo	1-248673694	1	248673694	6.95e-20	3.15e-14	0.477925	0.232707	0.268848	-0.0266708	12	Mo-2
Mo	1-248673702	1	248673702	2.11e-20	1.08e-14	0.472958	0.232707	0.269896	-0.0270808	12	Mo-2
Mo	1-248673730	1	248673730	1.19e-20	7.06e-15	0.469095	0.232707	0.270398	-0.0272234	12	Mo-2
Mo	1-248673858	1	248673858	1.46e-14	2.63e-09	0.357064	0.232707	0.258188	-0.0230926	12	Mo-2
Mo	1-248743910	1	248743910	7.82e-20	3.36e-14	0.239514	0.232707	0.268744	-0.0312079	12	Mo-2
Mo	1-248744092	1	248744092	1.03e-21	7.93e-16	0.381347	0.232707	0.272556	-0.0285389	12	Mo-2
Mo	1-248745756	1	248745756	4.28e-08	0.00144154	0.118653	0.232707	0.245536	-0.0277609	12	Mo-2
Mo	1-248752470	1	248752470	1.17e-12	1.13e-07	0.190397	0.232707	0.254427	-0.027179	12	Mo-2
Mo	1-248756310	1	248756310	8.67e-07	0.0196793	0.119757	0.232707	0.243034	-0.024557	12	Mo-2
Mo	1-248756796	1	248756796	3.68e-15	8.11e-10	0.18819	0.232707	0.259379	-0.0305123	12	Mo-2
Mo	1-248765865	1	248765865	1.57e-12	1.48e-07	0.304636	0.232707	0.254175	-0.022334	12	Mo-2
Mo	1-248765928	1	248765928	6.04e-12	4.62e-07	0.215784	0.232707	0.253024	-0.0242131	12	Mo-2
Mo	1-248767807	1	248767807	5.29e-12	4.25e-07	0.226269	0.232707	0.253138	-0.0235981	12	Mo-2
Mo	1-248768156	1	248768156	3.37e-07	0.00908717	0.116998	0.232707	0.243817	-0.026165	12	Mo-2
Mo	1-248778102	1	248778102	3.15e-15	7.15e-10	0.173841	0.232707	0.259513	-0.0319759	12	Mo-2
Mo	1-248800963	1	248800963	1.6e-14	2.74e-09	0.187086	0.232707	0.258112	-0.0300489	12	Mo-2
Mo	1-248805875	1	248805875	3.98e-07	0.0104245	0.120309	0.232707	0.243678	-0.025437	12	Mo-2
Mo	1-248808818	1	248808818	1.88e-10	9.62e-06	0.206954	0.232707	0.250102	-0.023511	12	Mo-2
Mo	1-248843295	1	248843295	2.29e-14	3.69e-09	0.187086	0.232707	0.2578	-0.0298929	12	Mo-2
Mo	1-248843420	1	248843420	1.16e-08	0.000418086	0.157837	0.232707	0.246629	-0.0228895	12	Mo-2
Mo	1-248848195	1	248848195	1.07e-06	0.0236326	0.118102	0.232707	0.242856	-0.0246342	12	Mo-2
Mo	1-248849310	1	248849310	2.83e-13	3.47e-08	0.193709	0.232707	0.255641	-0.027944	12	Mo-2
Mo	1-248849496	1	248849496	1.24e-13	1.68e-08	0.183223	0.232707	0.256349	-0.0290341	12	Mo-2
Mo	1-248850650	1	248850650	1.63e-06	0.0330401	0.119205	0.232707	0.242511	-0.0242555	12	Mo-2
Mo	1-248850697	1	248850697	3.89e-12	3.26e-07	0.177152	0.232707	0.2534	-0.0270618	12	Mo-2
Mo	1-248852840	1	248852840	6.68e-15	1.43e-09	0.188742	0.232707	0.258864	-0.0303215	12	Mo-2
Mo	1-248855859	1	248855859	3.98e-07	0.0104245	0.120309	0.232707	0.243678	-0.025437	12	Mo-2
Mo	1-248861999	1	248861999	8.55e-07	0.019481	0.120309	0.232707	0.243044	-0.0246866	12	Mo-2
Mo	1-248877879	1	248877879	1.16e-12	1.13e-07	0.193709	0.232707	0.254437	-0.0260875	12	Mo-2
Mo	1-248880047	1	248880047	1.51e-14	2.65e-09	0.18819	0.232707	0.25816	-0.0299604	12	Mo-2
Mo	1-248880327	1	248880327	7.06e-07	0.0167678	0.119757	0.232707	0.243203	-0.0249829	12	Mo-2
Mo	1-248884571	1	248884571	1.67e-13	2.15e-08	0.182671	0.232707	0.256094	-0.0285176	12	Mo-2
Mo	1-248888733	1	248888733	4.79e-13	5.36e-08	0.215232	0.232707	0.255191	-0.0258538	12	Mo-2
Mo	1-248889044	1	248889044	1.19e-06	0.0255146	0.0397351	0.232707	0.242774	-0.0343326	12	Mo-2
Mo	1-248896169	1	248896169	6.4e-08	0.00205716	0.374172	0.232707	0.2452	-0.015805	12	Mo-2
Mo	1-248896184	1	248896184	7.92e-13	8.16e-08	0.214128	0.232707	0.25476	-0.0258749	12	Mo-2
Mo	1-248896219	1	248896219	8.37e-15	1.66e-09	0.189294	0.232707	0.258669	-0.0299964	12	Mo-2
Mo	1-248898482	1	248898482	8.97e-12	6.47e-07	0.175497	0.232707	0.252687	-0.0252778	12	Mo-2
Mo	1-248911286	1	248911286	9.01e-15	1.74e-09	0.211921	0.232707	0.258605	-0.0281872	12	Mo-2
Mo	1-248940370	1	248940370	9.67e-07	0.0215702	0.121965	0.232707	0.242943	-0.0243386	12	Mo-2
Mo	1-248954463	1	248954463	3.18e-17	1.07e-11	0.208057	0.232707	0.263497	-0.0312978	12	Mo-2
Mo	1-248956069	1	248956069	6.98e-15	1.46e-09	0.244481	0.232707	0.258826	-0.0265549	12	Mo-2
Mo	1-248956697	1	248956697	8.33e-17	2.38e-11	0.190397	0.232707	0.262659	-0.0321697	12	Mo-2
Mo	1-248977110	1	248977110	2.02e-15	4.73e-10	0.185982	0.232707	0.259897	-0.0305719	12	Mo-2
Mo	1-248979488	1	248979488	3.85e-17	1.19e-11	0.208057	0.232707	0.263331	-0.0311402	12	Mo-2
Mo	1-248980865	1	248980865	1.05e-15	2.61e-10	0.190397	0.232707	0.260464	-0.0310471	12	Mo-2
Mo	1-249008431	1	249008431	4.31e-16	1.11e-10	0.195916	0.232707	0.261233	-0.0307353	12	Mo-2
Mo	1-249008716	1	249008716	1.61e-06	0.0327885	0.0756071	0.232707	0.242521	0.0233205	12	Mo-2
Mo	1-249013813	1	249013813	1.76e-14	2.96e-09	0.189294	0.232707	0.258027	-0.0295899	12	Mo-2
Mo	1-249068655	1	249068655	3.78e-17	1.19e-11	0.192605	0.232707	0.263346	-0.0323282	12	Mo-2
Mo	1-249070020	1	249070020	1.81e-16	4.82e-11	0.196468	0.232707	0.261986	-0.0308955	12	Mo-2
Mo	1-249074659	1	249074659	2.94e-17	1.07e-11	0.197572	0.232707	0.263565	-0.0318264	12	Mo-2
Mo	1-249096222	1	249096222	1e-12	9.9e-08	0.435982	0.232707	0.25456	-0.0212997	12	Mo-2
Mo	1-249096294	1	249096294	5.91e-12	4.61e-07	0.424945	0.232707	0.253043	-0.020759	12	Mo-2
Mo	1-249096468	1	249096468	1.04e-11	7.23e-07	0.429912	0.232707	0.252562	-0.0207486	12	Mo-2
Mo	1-249096475	1	249096475	5.53e-11	3.23e-06	0.423289	0.232707	0.25114	-0.0197491	12	Mo-2
Mo	1-249096952	1	249096952	1.73e-09	7.08e-05	0.268764	0.232707	0.248226	-0.0201981	12	Mo-2
Mo	1-249096958	1	249096958	2.8e-13	3.47e-08	0.446468	0.232707	0.255651	-0.0221361	12	Mo-2
Mo	1-249097002	1	249097002	1.56e-10	8.05e-06	0.428808	0.232707	0.250259	-0.0193964	12	Mo-2
Mo	1-249097177	1	249097177	5.79e-12	4.58e-07	0.453642	0.232707	0.25306	-0.0209184	12	Mo-2
Mo	1-249097413	1	249097413	2.14e-10	1.07e-05	0.436534	0.232707	0.249995	-0.0193783	12	Mo-2
Mo	1-249097475	1	249097475	1.11e-09	4.73e-05	0.467439	0.232707	0.248603	-0.0185132	12	Mo-2
Mo	1-249097482	1	249097482	3.35e-10	1.62e-05	0.433775	0.232707	0.249614	-0.0192079	12	Mo-2
Mo	1-249097940	1	249097940	2.45e-11	1.56e-06	0.432671	0.232707	0.251832	-0.0202259	12	Mo-2
Mo	1-249098122	1	249098122	2.03e-11	1.31e-06	0.42053	0.232707	0.25199	-0.0203331	12	Mo-2
Mo	1-249098197	1	249098197	7.95e-10	3.47e-05	0.471302	0.232707	0.248884	-0.0184247	12	Mo-2
Mo	1-249098278	1	249098278	9.12e-11	5.07e-06	0.42053	0.232707	0.250715	-0.0197351	12	Mo-2
Mo	1-249098305	1	249098305	2.71e-11	1.68e-06	0.422185	0.232707	0.251748	-0.0202163	12	Mo-2
Mo	1-249098311	1	249098311	1.26e-12	1.2e-07	0.439845	0.232707	0.254366	-0.0214337	12	Mo-2
Mo	1-249098328	1	249098328	7.14e-12	5.3e-07	0.445364	0.232707	0.252882	-0.0207638	12	Mo-2
Mo	1-249098331	1	249098331	2.9e-10	1.42e-05	0.428256	0.232707	0.249735	-0.0191748	12	Mo-2
Mo	1-249098355	1	249098355	4.56e-12	3.74e-07	0.441501	0.232707	0.253264	-0.020981	12	Mo-2
Mo	1-249098375	1	249098375	1.41e-11	9.4e-07	0.425497	0.232707	0.252301	-0.0206934	12	Mo-2
Mo	1-249098407	1	249098407	3.8e-11	2.29e-06	0.42936	0.232707	0.25146	-0.0202837	12	Mo-2
Mo	1-249098456	1	249098456	4.04e-10	1.9e-05	0.42936	0.232707	0.249456	-0.0189103	12	Mo-2
Mo	1-249098505	1	249098505	2.9e-09	0.000114364	0.43543	0.232707	0.247792	-0.018138	12	Mo-2
Mo	1-249098520	1	249098520	8.32e-11	4.69e-06	0.452539	0.232707	0.250794	-0.0197609	12	Mo-2
Mo	1-249098648	1	249098648	1.34e-11	8.97e-07	0.426049	0.232707	0.252348	-0.0206395	12	Mo-2
Mo	1-249099819	1	249099819	6.02e-12	4.62e-07	0.421082	0.232707	0.253027	-0.0209204	12	Mo-2
Mo	1-249099900	1	249099900	3.7e-12	3.14e-07	0.445364	0.232707	0.253443	-0.0210308	12	Mo-2
Mo	1-249099902	1	249099902	1.49e-10	7.8e-06	0.428256	0.232707	0.250297	-0.0194932	12	Mo-2
Mo	1-249099910	1	249099910	4.34e-12	3.6e-07	0.40894	0.232707	0.253306	-0.0208541	12	Mo-2
Mo	1-249099970	1	249099970	7.12e-12	5.3e-07	0.423841	0.232707	0.252884	-0.0208487	12	Mo-2
Mo	1-249099982	1	249099982	9.49e-13	9.51e-08	0.398455	0.232707	0.254605	-0.0216222	12	Mo-2
Mo	1-249099988	1	249099988	3.32e-12	2.91e-07	0.443709	0.232707	0.253534	-0.0211842	12	Mo-2
Mo	1-249099998	1	249099998	4.91e-12	3.99e-07	0.418874	0.232707	0.253202	-0.0210831	12	Mo-2
Mo	1-249100000	1	249100000	1.41e-10	7.39e-06	0.4266	0.232707	0.250348	-0.0196109	12	Mo-2
Mo	1-249100039	1	249100039	3.78e-10	1.8e-05	0.359823	0.232707	0.249511	-0.0192312	12	Mo-2
Mo	1-249100071	1	249100071	1.02e-11	7.23e-07	0.424393	0.232707	0.252575	-0.0207102	12	Mo-2
Mo	1-249100103	1	249100103	6.41e-12	4.85e-07	0.464128	0.232707	0.252974	-0.0206667	12	Mo-2
Mo	1-249100127	1	249100127	1.38e-10	7.29e-06	0.428256	0.232707	0.250365	-0.0195302	12	Mo-2
Mo	1-249100200	1	249100200	1.28e-11	8.68e-07	0.4266	0.232707	0.252384	-0.020511	12	Mo-2
Mo	1-249100269	1	249100269	8.75e-12	6.37e-07	0.428808	0.232707	0.252709	-0.0206849	12	Mo-2
Mo	1-249100349	1	249100349	9.65e-11	5.28e-06	0.429912	0.232707	0.250668	-0.0196812	12	Mo-2
Mo	1-249100392	1	249100392	8.04e-11	4.56e-06	0.432119	0.232707	0.250822	-0.0197561	12	Mo-2
Mo	1-249100735	1	249100735	1.69e-11	1.11e-06	0.428256	0.232707	0.252148	-0.0206042	12	Mo-2
Mo	1-249100802	1	249100802	1.04e-11	7.23e-07	0.427704	0.232707	0.252563	-0.020627	12	Mo-2
Mo	1-249100915	1	249100915	5.82e-12	4.58e-07	0.450883	0.232707	0.253057	-0.0210588	12	Mo-2
Mo	1-249101186	1	249101186	2.72e-08	0.000940672	0.389073	0.232707	0.245914	-0.0168909	12	Mo-2
Mo	1-249101188	1	249101188	9.96e-09	0.000366089	0.423289	0.232707	0.246756	-0.0175222	12	Mo-2
Mo	1-249101292	1	249101292	4.32e-10	2e-05	0.423289	0.232707	0.249399	-0.019212	12	Mo-2
Mo	1-249106040	1	249106040	3.17e-17	1.07e-11	0.200883	0.232707	0.263499	-0.0319024	12	Mo-2
Mo	1-249134130	1	249134130	1.71e-12	1.59e-07	0.346578	0.232707	0.254104	-0.0214912	12	Mo-2
Mo	1-249134310	1	249134310	1.17e-06	0.0253721	0.300773	0.232707	0.242788	-0.0149706	12	Mo-2
Mo	1-249134344	1	249134344	1.86e-12	1.71e-07	0.357064	0.232707	0.25403	-0.0213821	12	Mo-2
Mo	1-249134439	1	249134439	9.37e-13	9.51e-08	0.344371	0.232707	0.254617	-0.0217548	12	Mo-2
Mo	1-249134552	1	249134552	2.1e-12	1.91e-07	0.349338	0.232707	0.253927	-0.0213712	12	Mo-2
Mo	1-249134805	1	249134805	3.32e-09	0.000128639	0.424393	0.232707	0.24768	-0.0173693	12	Mo-2
Mo	1-249136199	1	249136199	1.22e-08	0.000439747	0.301325	0.232707	0.246582	-0.0176127	12	Mo-2
Mo	1-249136248	1	249136248	5.99e-10	2.72e-05	0.350993	0.232707	0.249122	-0.0183713	12	Mo-2
Mo	1-249136373	1	249136373	3.72e-07	0.00992663	0.483444	0.232707	0.243735	-0.0142383	12	Mo-2
Mo	1-249136396	1	249136396	1.02e-06	0.0225422	0.442053	0.232707	0.242897	-0.0138841	12	Mo-2
Mo	1-249136452	1	249136452	7.44e-10	3.28e-05	0.343819	0.232707	0.24894	-0.0185034	12	Mo-2
Mo	1-249136509	1	249136509	1.33e-07	0.00403955	0.415011	0.232707	0.24459	-0.0153914	12	Mo-2
Mo	1-249136592	1	249136592	3.23e-07	0.00874934	0.405077	0.232707	0.243852	-0.0145714	12	Mo-2
Mo	1-249196538	1	249196538	1.34e-09	5.61e-05	0.333885	0.232707	0.24844	-0.0184252	12	Mo-2
Mo	1-249196718	1	249196718	1.22e-09	5.15e-05	0.3383	0.232707	0.248522	-0.0186208	12	Mo-2
Mo	1-249196863	1	249196863	9.02e-10	3.91e-05	0.344371	0.232707	0.248777	-0.0186223	12	Mo-2
Mo	1-249197003	1	249197003	9.36e-10	4.04e-05	0.339956	0.232707	0.248746	-0.0187425	12	Mo-2
Mo	1-249197359	1	249197359	3.81e-10	1.81e-05	0.333885	0.232707	0.249504	-0.0192242	12	Mo-2
Mo	1-249197588	1	249197588	1.72e-06	0.0345813	0.337748	0.232707	0.242469	-0.0143271	12	Mo-2
Mo	1-249200674	1	249200674	1.27e-07	0.00386981	0.330022	0.232707	0.244629	-0.0159424	12	Mo-2
Mo	1-249201655	1	249201655	1.62e-07	0.00476923	0.328366	0.232707	0.244426	-0.0158483	12	Mo-2
Mo	1-249201833	1	249201833	2.32e-06	0.0449829	0.325607	0.232707	0.242221	-0.0143319	12	Mo-2
Mo	1-249202169	1	249202169	7.01e-11	4.07e-06	0.30574	0.232707	0.250938	-0.0203029	12	Mo-2
Mo	1-249202355	1	249202355	2.72e-10	1.35e-05	0.287528	0.232707	0.24979	-0.020204	12	Mo-2
Mo	1-249202576	1	249202576	7.82e-11	4.5e-06	0.288631	0.232707	0.250846	-0.0207736	12	Mo-2
Mo	1-249203284	1	249203284	1.88e-06	0.0373837	0.270419	0.232707	0.242394	-0.0154251	12	Mo-2
Mo	1-249203387	1	249203387	1.56e-06	0.0318696	0.282009	0.232707	0.24255	-0.0153416	12	Mo-2
Mo	1-249203566	1	249203566	1.37e-06	0.0288592	0.449779	0.232707	0.242654	-0.0138509	12	Mo-2
Mo	1-249203731	1	249203731	7.15e-07	0.0168717	0.450883	0.232707	0.243192	-0.0141919	12	Mo-2
Mo	1-249203854	1	249203854	1.13e-10	6.16e-06	0.287528	0.232707	0.250531	-0.020729	12	Mo-2
Mo	1-249203947	1	249203947	2.13e-07	0.00603264	0.41777	0.232707	0.244199	-0.0149414	12	Mo-2
Mo	1-249209264	1	249209264	1.09e-07	0.00337837	0.33223	0.232707	0.244752	-0.0166671	12	Mo-2
Mo	1-249209655	1	249209655	2.95e-10	1.43e-05	0.195364	0.232707	0.249721	-0.024064	12	Mo-2
Mo	1-249209755	1	249209755	5.02e-08	0.00165597	0.288079	0.232707	0.245402	-0.0172758	12	Mo-2
Mo	1-249212022	1	249212022	5.47e-07	0.0134818	0.20585	0.232707	0.243415	-0.0172238	12	Mo-2
Mo	1-249212121	1	249212121	1.37e-09	5.64e-05	0.255519	0.232707	0.248427	-0.0198763	12	Mo-2
Mo	1-249212625	1	249212625	1.52e-09	6.23e-05	0.253311	0.232707	0.248338	-0.0199061	12	Mo-2
Mo	1-249212759	1	249212759	1.05e-08	0.000384543	0.25	0.232707	0.246711	-0.018721	12	Mo-2
Mo	1-249219405	1	249219405	2.22e-10	1.11e-05	0.181015	0.232707	0.249961	-0.0241321	12	Mo-2
Mo	1-249219738	1	249219738	3.48e-10	1.67e-05	0.256623	0.232707	0.249582	-0.0205775	12	Mo-2
Mo	1-249241315	1	249241315	1.81e-07	0.00526096	0.195916	0.232707	0.244333	-0.0184953	12	Mo-2
Mo	1-249243750	1	249243750	1.58e-13	2.07e-08	0.187638	0.232707	0.256141	-0.0287831	12	Mo-2
Mo	1-249243790	1	249243790	1.56e-07	0.00460786	0.365342	0.232707	0.244458	-0.0158392	12	Mo-2
Mo	1-249248332	1	249248332	9.17e-07	0.0206297	0.135762	0.232707	0.242987	-0.0212575	12	Mo-2
Mo	1-249248337	1	249248337	1.46e-08	0.000520961	0.190949	0.232707	0.246433	-0.021002	12	Mo-2
Mo	1-249248456	1	249248456	1.53e-07	0.00454059	0.354857	0.232707	0.244473	-0.0160988	12	Mo-2
Mo	1-249248598	1	249248598	5.81e-13	6.32e-08	0.200331	0.232707	0.255025	-0.0270758	12	Mo-2
Mo	1-249248759	1	249248759	1.61e-08	0.000570782	0.356512	0.232707	0.246352	-0.0172594	12	Mo-2
Mo	1-249248764	1	249248764	4.38e-08	0.00146584	0.359272	0.232707	0.245515	-0.0166679	12	Mo-2
Mo	1-249248798	1	249248798	2.37e-14	3.73e-09	0.203091	0.232707	0.257774	-0.0285531	12	Mo-2
Mo	1-249248841	1	249248841	8.05e-08	0.00252768	0.359272	0.232707	0.245007	-0.01635	12	Mo-2
Mo	1-249248845	1	249248845	1.37e-13	1.82e-08	0.191501	0.232707	0.256264	-0.0282973	12	Mo-2
Mo	1-249248851	1	249248851	1.02e-11	7.23e-07	0.265453	0.232707	0.252581	-0.0217992	12	Mo-2
Mo	1-249248910	1	249248910	7.03e-13	7.44e-08	0.236755	0.232707	0.254862	-0.0248184	12	Mo-2
Mo	1-249249318	1	249249318	4.47e-14	6.64e-09	0.252208	0.232707	0.257226	-0.0251116	12	Mo-2
Mo	1-249249325	1	249249325	2.73e-08	0.000940672	0.360375	0.232707	0.245911	-0.0169535	12	Mo-2
Mo	1-249250044	1	249250044	1.9e-07	0.00547885	0.348786	0.232707	0.244292	-0.0160921	12	Mo-2
Mo	1-249250229	1	249250229	4.2e-11	2.49e-06	0.238962	0.232707	0.251374	-0.0224223	12	Mo-2
Mo	1-249250232	1	249250232	4.04e-11	2.42e-06	0.233444	0.232707	0.251407	-0.0228139	12	Mo-2
Mo	1-249250269	1	249250269	1.06e-13	1.46e-08	0.206402	0.232707	0.256483	-0.0272795	12	Mo-2
Mo	1-249250392	1	249250392	1.95e-13	2.47e-08	0.190949	0.232707	0.25596	-0.0273201	12	Mo-2
Mo	1-249250487	1	249250487	2.16e-12	1.94e-07	0.230684	0.232707	0.253903	-0.0245174	12	Mo-2
Mo	1-249250509	1	249250509	3.12e-13	3.71e-08	0.235651	0.232707	0.255557	-0.0250696	12	Mo-2
Mo	1-249250513	1	249250513	8.43e-14	1.21e-08	0.199779	0.232707	0.256681	-0.0281726	12	Mo-2
Mo	1-249250522	1	249250522	1.87e-11	1.21e-06	0.238962	0.232707	0.252063	-0.0229124	12	Mo-2
Mo	1-249250578	1	249250578	1.48e-06	0.0304725	0.345475	0.232707	0.242593	-0.0149591	12	Mo-2
Mo	1-249250643	1	249250643	3.89e-07	0.0102468	0.348786	0.232707	0.243697	-0.0156785	12	Mo-2
Mo	1-249250661	1	249250661	5.2e-07	0.0129148	0.341611	0.232707	0.243456	-0.0156871	12	Mo-2
Mo	1-249250668	1	249250668	4.17e-07	0.0108275	0.34713	0.232707	0.24364	-0.0156631	12	Mo-2
Mo	1-249250677	1	249250677	4.31e-13	4.97e-08	0.235651	0.232707	0.255281	-0.0251108	12	Mo-2
Mo	1-249250719	1	249250719	1.87e-15	4.5e-10	0.204194	0.232707	0.259966	-0.0296026	12	Mo-2
Mo	1-249250805	1	249250805	7.7e-08	0.00244553	0.351545	0.232707	0.245045	-0.0165542	12	Mo-2
Mo	1-249250865	1	249250865	6.51e-07	0.0155695	0.339956	0.232707	0.24327	-0.0156448	12	Mo-2
Mo	1-249250874	1	249250874	8.05e-07	0.0184893	0.346026	0.232707	0.243095	-0.0153475	12	Mo-2
Mo	1-249250881	1	249250881	3.03e-13	3.66e-08	0.201435	0.232707	0.255583	-0.0273914	12	Mo-2
Mo	1-249251025	1	249251025	9.52e-07	0.0213552	0.330574	0.232707	0.242956	-0.0145418	12	Mo-2
Mo	1-249251042	1	249251042	2.92e-11	1.8e-06	0.18543	0.232707	0.251683	-0.0241043	12	Mo-2
Mo	1-249251080	1	249251080	2.68e-09	0.000105993	0.220199	0.232707	0.24786	-0.0197795	12	Mo-2
Mo	1-249251100	1	249251100	2.62e-06	0.0493027	0.327815	0.232707	0.242121	-0.0140774	12	Mo-2
Mo	1-249251219	1	249251219	1.94e-06	0.038343	0.33223	0.232707	0.242367	-0.0142317	12	Mo-2
Mo	1-249251313	1	249251313	5.03e-09	0.000190381	0.22351	0.232707	0.247329	-0.0194019	12	Mo-2
Mo	1-249251466	1	249251466	9.02e-09	0.000334794	0.23234	0.232707	0.246839	-0.0187179	12	Mo-2
Mo	1-249251476	1	249251476	1.22e-09	5.15e-05	0.193157	0.232707	0.248521	-0.0216951	12	Mo-2
Mo	1-249251586	1	249251586	2.08e-09	8.39e-05	0.194812	0.232707	0.248074	-0.0212052	12	Mo-2
Mo	1-249251671	1	249251671	3.39e-12	2.94e-07	0.215784	0.232707	0.253516	-0.0252867	12	Mo-2
Mo	1-249251710	1	249251710	3.07e-12	2.72e-07	0.208609	0.232707	0.253603	-0.0258059	12	Mo-2
Mo	1-249251817	1	249251817	5.19e-13	5.73e-08	0.211369	0.232707	0.255121	-0.0265866	12	Mo-2
Mo	1-249251860	1	249251860	6.83e-10	3.03e-05	0.241722	0.232707	0.249012	-0.021079	12	Mo-2
Mo	1-249251895	1	249251895	6.34e-10	2.84e-05	0.242826	0.232707	0.249075	-0.0211261	12	Mo-2
Mo	1-249251906	1	249251906	1.33e-06	0.0282147	0.338852	0.232707	0.242679	-0.0152207	12	Mo-2
Mo	1-249251953	1	249251953	1.91e-10	9.7e-06	0.212472	0.232707	0.250089	-0.0232109	12	Mo-2
Mo	1-249252009	1	249252009	3.66e-12	3.14e-07	0.208057	0.232707	0.253452	-0.0257855	12	Mo-2
Mo	1-249252047	1	249252047	8.86e-11	4.96e-06	0.247792	0.232707	0.25074	-0.0219091	12	Mo-2
Mo	1-249252082	1	249252082	1.12e-11	7.74e-07	0.280905	0.232707	0.252496	-0.0214305	12	Mo-2
Mo	1-249252117	1	249252117	2.48e-11	1.57e-06	0.234547	0.232707	0.251822	-0.0231581	12	Mo-2
Mo	1-249252118	1	249252118	6.63e-13	7.1e-08	0.230132	0.232707	0.254913	-0.0252038	12	Mo-2
Mo	1-249252185	1	249252185	3.72e-14	5.69e-09	0.199779	0.232707	0.257385	-0.0286689	12	Mo-2
Mo	1-249252198	1	249252198	6.03e-07	0.0147211	0.346578	0.232707	0.243333	-0.0155169	12	Mo-2
Mo	1-249252269	1	249252269	8.57e-12	6.3e-07	0.232892	0.232707	0.252726	-0.0230182	12	Mo-2
Mo	1-249252273	1	249252273	1.19e-10	6.43e-06	0.225717	0.232707	0.250489	-0.0220052	12	Mo-2
Mo	1-249252396	1	249252396	1.87e-06	0.0372178	0.328366	0.232707	0.2424	-0.0148568	12	Mo-2
Mo	1-249252406	1	249252406	2.8e-07	0.00773229	0.339404	0.232707	0.243969	-0.0156419	12	Mo-2
Mo	1-249252410	1	249252410	1.43e-06	0.0297766	0.333885	0.232707	0.242622	-0.014773	12	Mo-2
Mo	1-249252418	1	249252418	3.76e-14	5.69e-09	0.194812	0.232707	0.257375	-0.0278294	12	Mo-2
Mo	1-249252425	1	249252425	3.39e-13	3.97e-08	0.190397	0.232707	0.255487	-0.0271458	12	Mo-2
Mo	1-249252453	1	249252453	2.26e-06	0.044119	0.331678	0.232707	0.242243	-0.0146335	12	Mo-2
Mo	1-249252476	1	249252476	1.24e-11	8.45e-07	0.221302	0.232707	0.252414	-0.0233772	12	Mo-2
Mo	1-249252506	1	249252506	1.01e-13	1.42e-08	0.198124	0.232707	0.256524	-0.0271389	12	Mo-2
Mo	1-249252517	1	249252517	4.57e-13	5.19e-08	0.192053	0.232707	0.255231	-0.0269323	12	Mo-2
Mo	1-249252618	1	249252618	6.41e-07	0.0154719	0.293046	0.232707	0.243283	-0.0163554	12	Mo-2
Mo	1-249252636	1	249252636	2.53e-06	0.0479028	0.333885	0.232707	0.242151	-0.014433	12	Mo-2
Mo	1-249252651	1	249252651	7.13e-07	0.0168717	0.330022	0.232707	0.243195	-0.015298	12	Mo-2
Mo	1-249252851	1	249252851	7.29e-14	1.06e-08	0.199227	0.232707	0.256806	-0.0283489	12	Mo-2
Mo	1-249336912	1	249336912	1.36e-06	0.0286606	0.192605	0.232707	0.242662	-0.017566	12	Mo-2
Mo	1-249336925	1	249336925	2.39e-08	0.000830587	0.232892	0.232707	0.246023	-0.0183532	12	Mo-2
Mo	1-249336950	1	249336950	4.61e-07	0.0116782	0.252759	0.232707	0.243556	-0.0161171	12	Mo-2
Mo	1-249337201	1	249337201	4.39e-08	0.00146584	0.343819	0.232707	0.245515	-0.0159133	12	Mo-2
Mo	1-249337376	1	249337376	4.48e-08	0.00149128	0.246689	0.232707	0.245497	-0.0181857	12	Mo-2
Mo	1-249398833	1	249398833	1.18e-06	0.0255146	0.347682	0.232707	0.24278	-0.0142854	12	Mo-2
Mo	1-249399160	1	249399160	3e-07	0.00819687	0.359272	0.232707	0.243912	-0.0148173	12	Mo-2
Mo	1-249399559	1	249399559	9.03e-08	0.00280098	0.356512	0.232707	0.244911	-0.0156071	12	Mo-2
Mo	1-249400423	1	249400423	1.41e-06	0.0294902	0.309603	0.232707	0.242634	-0.0160706	12	Mo-2
Mo	1-249400649	1	249400649	2.34e-06	0.0452136	0.142936	0.232707	0.242215	-0.0207725	12	Mo-2
Mo	1-249401147	1	249401147	1.32e-06	0.0281422	0.140728	0.232707	0.242686	-0.0215139	12	Mo-2
Mo	1-249402860	1	249402860	1.84e-07	0.00533397	0.317881	0.232707	0.244317	-0.0155588	12	Mo-2
Mo	1-249426177	1	249426177	4.06e-09	0.000155296	0.289183	0.232707	0.247509	-0.0194892	12	Mo-2
Mo	1-249426283	1	249426283	9.91e-09	0.000366089	0.290839	0.232707	0.24676	-0.0190166	12	Mo-2
Mo	1-249426883	1	249426883	2.6e-07	0.0072418	0.312362	0.232707	0.244032	-0.0161423	12	Mo-2
Mo	1-249428267	1	249428267	1.76e-09	7.16e-05	0.183775	0.232707	0.248212	-0.0233367	12	Mo-2
Mo	1-249428291	1	249428291	2.41e-07	0.00675958	0.286424	0.232707	0.244096	-0.0158665	12	Mo-2
Mo	1-249428625	1	249428625	4.55e-07	0.0115663	0.139073	0.232707	0.243566	-0.0228613	12	Mo-2
Mo	1-249428645	1	249428645	3.58e-09	0.000137684	0.234547	0.232707	0.247614	-0.0201615	12	Mo-2
Mo	1-249429317	1	249429317	1.48e-11	9.77e-07	0.346026	0.232707	0.252261	-0.0199098	12	Mo-2
Mo	1-249429354	1	249429354	2.2e-09	8.84e-05	0.237859	0.232707	0.248026	-0.0203244	12	Mo-2
Mo	1-249429586	1	249429586	5.47e-09	0.00020586	0.23234	0.232707	0.247259	-0.0200378	12	Mo-2
Mo	1-249429611	1	249429611	2.45e-09	9.73e-05	0.23234	0.232707	0.247936	-0.0204762	12	Mo-2
Mo	1-249429709	1	249429709	5.24e-08	0.00172221	0.229029	0.232707	0.245366	-0.0185347	12	Mo-2
Mo	1-249429824	1	249429824	6.13e-10	2.77e-05	0.241722	0.232707	0.249103	-0.0209637	12	Mo-2
Mo	1-249430851	1	249430851	7.19e-13	7.5e-08	0.260486	0.232707	0.254843	-0.0234319	12	Mo-2
Mo	1-249451479	1	249451479	3.61e-07	0.00968558	0.116998	0.232707	0.243758	-0.0237854	12	Mo-2
Mo	1-249454119	1	249454119	3.3e-09	0.000128639	0.225717	0.232707	0.247683	-0.0207966	12	Mo-2
Mo	1-249465755	1	249465755	1.64e-07	0.00480553	0.216887	0.232707	0.244416	-0.0184242	12	Mo-2
Mo	1-249465793	1	249465793	2.07e-07	0.00594342	0.125828	0.232707	0.244221	-0.0245986	12	Mo-2
Mo	1-249466987	1	249466987	2.49e-06	0.0475809	0.224062	0.232707	0.242162	-0.01602	12	Mo-2
Mo	1-249467505	1	249467505	7.62e-07	0.0176089	0.253311	0.232707	0.24314	-0.0159569	12	Mo-2
Mo	1-249491337	1	249491337	1.52e-06	0.0312001	0.243377	0.232707	0.24257	-0.0158227	12
Mo	1-249506743	1	249506743	2.4e-06	0.0462657	0.140177	0.232707	0.242192	-0.0205063	12
Mo	1-249543461	1	249543461	5.46e-08	0.00177779	0.125828	0.232707	0.245332	-0.0256633	12
Mo	1-249543643	1	249543643	2.13e-07	0.00603264	0.124724	0.232707	0.244198	-0.0247055	12
Mo	1-249543766	1	249543766	1.51e-06	0.0311048	0.131898	0.232707	0.242574	-0.022196	12
Mo	1-249543907	1	249543907	2.77e-07	0.00766672	0.122517	0.232707	0.243979	-0.0248854	12
Mo	1-249544197	1	249544197	3.5e-07	0.00941599	0.13521	0.232707	0.243785	-0.0231888	12
Mo	1-249545163	1	249545163	1.21e-06	0.0260509	0.139073	0.232707	0.242754	-0.02149	12
Mo	1-249545190	1	249545190	1.38e-07	0.00416847	0.116998	0.232707	0.244557	-0.0257783	12
Mo	1-249545400	1	249545400	4.55e-07	0.0115663	0.133554	0.232707	0.243568	-0.0230388	12
Mo	1-249547461	1	249547461	1.81e-07	0.00526096	0.145695	0.232707	0.244332	0.0200189	12
Mo	1-249547890	1	249547890	7.62e-07	0.0176089	0.140177	0.232707	0.24314	0.0188564	12
Mo	1-249548125	1	249548125	8.95e-07	0.0202616	0.140728	0.232707	0.243007	0.0187139	12
Mo	1-249589151	1	249589151	1.81e-06	0.0363746	0.316225	0.232707	0.242423	-0.0141102	12
Mo	1-249589212	1	249589212	1.28e-06	0.0273192	0.371413	0.232707	0.242713	-0.0141253	12
Mo	1-249589223	1	249589223	5.22e-07	0.012928	0.227373	0.232707	0.243453	-0.0170851	12
Mo	1-249591985	1	249591985	2.71e-07	0.0075285	0.108168	0.232707	0.243997	-0.0262826	12
Mo	1-249687029	1	249687029	4.79e-07	0.0120365	0.18543	0.232707	0.243525	-0.0189579	12
Mo	1-249987574	1	249987574	2.24e-08	0.000783042	0.442605	0.232707	0.246076	-0.0159095	12
Mo	1-249987872	1	249987872	7.91e-07	0.0182301	0.395695	0.232707	0.243109	-0.0142816	12
Mo	1-250026082	1	250026082	6.45e-07	0.0154755	0.274283	0.232707	0.243278	0.0152445	12
Mo	1-250026122	1	250026122	4.32e-07	0.0111237	0.368102	0.232707	0.24361	0.0143729	12
Mo	1-250046102	1	250046102	1.47e-07	0.00440899	0.447572	0.232707	0.244507	-0.0146185	12
Mo	1-250115859	1	250115859	2.57e-06	0.0486548	0.119205	0.232707	0.242136	0.0221349	12
Mo	1-250174422	1	250174422	1.36e-06	0.0286606	0.331126	0.232707	0.242662	0.0144447	12
Mo	1-250175013	1	250175013	6.04e-07	0.0147211	0.301876	0.232707	0.243332	0.015174	12
Mo	1-250175029	1	250175029	1.33e-06	0.0282147	0.136865	0.232707	0.242681	-0.0215395	12
Mo	1-250176221	1	250176221	2.9e-07	0.00793778	0.300221	0.232707	0.243941	0.0156222	12
Mo	1-250176482	1	250176482	1.18e-06	0.0255146	0.299117	0.232707	0.242776	0.0147882	12
Mo	1-250176718	1	250176718	2.13e-07	0.00603264	0.300773	0.232707	0.244196	0.0157628	12
Mo	1-250177396	1	250177396	9.83e-07	0.0218141	0.297461	0.232707	0.242929	0.0148982	12
Mo	1-250177415	1	250177415	5.64e-07	0.0138646	0.301876	0.232707	0.243389	0.0151809	12
Mo	1-250177686	1	250177686	4.53e-07	0.0115663	0.314018	0.232707	0.243571	0.0152217	12
Mo	1-250177742	1	250177742	1.17e-06	0.0253721	0.311258	0.232707	0.242789	0.0146695	12
Mo	1-250177756	1	250177756	9.87e-07	0.0218319	0.309603	0.232707	0.242926	0.0148252	12
Mo	1-250181553	1	250181553	6.38e-08	0.00205716	0.194812	0.232707	0.245201	-0.019317	12
Mo	1-250185615	1	250185615	8.24e-07	0.0188676	0.130243	0.232707	0.243076	-0.0233051	12
Mo	1-250301337	1	250301337	2.32e-06	0.0449829	0.164459	0.232707	0.242221	-0.0193852	12
Mo	1-251659096	1	251659096	4.15e-07	0.0108275	0.212472	0.232707	0.243643	-0.0182394	13
Mo	1-251736517	1	251736517	8.32e-07	0.0189995	0.286424	0.232707	0.243068	-0.0160095	13
Mo	1-251739967	1	251739967	2.05e-06	0.0402345	0.389073	0.232707	0.242323	-0.0142366	13
Mo	1-257316061	1	257316061	1.9e-06	0.0376727	0.380243	0.232707	0.242386	-0.0135432	14
Mo	1-257316073	1	257316073	5.88e-07	0.0144207	0.396799	0.232707	0.243354	-0.0139701	14
Mo	1-257316847	1	257316847	1.09e-06	0.0239288	0.428808	0.232707	0.242843	-0.0135783	14
Mo	3-6390736	3	6390736	2.49e-06	0.0475809	0.0104857	0.232707	0.242161	0.0565806
Mo	3-136776841	3	136776841	7.24e-07	0.0169345	0.0143488	0.232707	0.243183	0.051425	15
Mo	3-136790595	3	136790595	6.32e-07	0.015293	0.0209713	0.232707	0.243295	0.0447691	15
Mo	5-68570107	5	68570107	1.45e-06	0.0301915	0.013245	0.232707	0.242606	0.0536697
Mo	5-169298781	5	169298781	2.39e-06	0.0461975	0.0226269	0.232707	0.242195	-0.0400408	16
Mo	5-169376072	5	169376072	3.03e-07	0.00824859	0.0220751	0.232707	0.243903	-0.0445448	16
Mo	7-167561312	7	167561312	6.79e-07	0.0161748	0.230684	0.232707	0.243236	0.0159307
Ni	1-258694474	1	258694474	3.91e-06	0.0343953	0.479823	0.199921	0.209408	0.0156533
Ni	1-261810448	1	261810448	1.98e-06	0.0206942	0.0939746	0.199921	0.209992	0.0322756	17
Ni	1-261823553	1	261823553	2.89e-06	0.0275955	0.100608	0.199921	0.209668	0.0298138	17
Ni	1-261825615	1	261825615	2.28e-06	0.0231215	0.0912106	0.199921	0.209871	0.0322666	17
Ni	1-261831247	1	261831247	5.92e-06	0.0465556	0.0956329	0.199921	0.209052	0.0299159	17
Ni	1-261837981	1	261837981	3.68e-06	0.0328752	0.0983969	0.199921	0.209461	0.0303695	17
Ni	1-261842804	1	261842804	4.43e-06	0.0375148	0.0956329	0.199921	0.209302	0.0306904	17
Ni	1-261848174	1	261848174	3.06e-06	0.028521	0.0956329	0.199921	0.20962	0.0311872	17
Ni	1-261848714	1	261848714	3.29e-06	0.0303419	0.100608	0.199921	0.209556	0.0303987	17
Ni	1-261859962	1	261859962	5.66e-06	0.0449186	0.0989497	0.199921	0.209092	0.0296931	17
Ni	1-261860794	1	261860794	1.28e-06	0.0149363	0.0917634	0.199921	0.210367	0.033391	17
Ni	1-261877964	1	261877964	5.71e-07	0.00748797	0.0961857	0.199921	0.211067	0.0327234	17
Ni	1-261878586	1	261878586	5.39e-07	0.00711573	0.0961857	0.199921	0.211117	0.0329969	17
Ni	1-261888299	1	261888299	1.83e-06	0.0195969	0.0967385	0.199921	0.21006	0.0315663	17
Ni	1-261901968	1	261901968	1.87e-06	0.0198542	0.0851299	0.199921	0.210043	0.034597	17
Ni	1-262033644	1	262033644	3.81e-06	0.0337183	0.102819	0.199921	0.209431	0.0287945	17
Ni	1-262051371	1	262051371	1.93e-06	0.0202656	0.0945274	0.199921	0.210017	0.0317242	17
Ni	1-262060371	1	262060371	2.37e-06	0.0237993	0.0873411	0.199921	0.209839	0.0335615	17
Ni	1-262080938	1	262080938	5.1e-06	0.0418874	0.0823659	0.199921	0.209181	0.0344107	17
Ni	1-262195763	1	262195763	4.71e-06	0.0393249	0.444997	0.199921	0.209249	0.0159707	17
Ni	1-262195852	1	262195852	3.11e-06	0.0289514	0.409619	0.199921	0.209606	0.0163624	17
Ni	1-262195854	1	262195854	2.26e-06	0.02292	0.416805	0.199921	0.20988	0.016718	17
Ni	1-262195879	1	262195879	8.7e-07	0.0106893	0.435047	0.199921	0.210703	0.017325	17
Ni	1-262345749	1	262345749	6.24e-07	0.00807089	0.117192	0.199921	0.21099	0.0283532	17
Ni	1-262346888	1	262346888	1.53e-06	0.0171942	0.113322	0.199921	0.210216	0.02808	17
Ni	1-262348067	1	262348067	3.65e-07	0.00506144	0.119403	0.199921	0.211454	0.0285172	17
Ni	1-262349831	1	262349831	1.06e-06	0.0126742	0.118297	0.199921	0.210532	0.0275307	17
Ni	1-262350053	1	262350053	6.6e-07	0.00850979	0.116639	0.199921	0.210941	0.0283679	17
Ni	1-262350741	1	262350741	1.85e-06	0.0196996	0.112769	0.199921	0.210052	0.0278428	17
Ni	1-262350936	1	262350936	2.85e-07	0.00406056	0.117192	0.199921	0.211671	0.0292795	17
Ni	1-262351796	1	262351796	1.4e-06	0.0160317	0.119403	0.199921	0.21029	0.0267213	17
Ni	1-262351884	1	262351884	4.76e-07	0.0063626	0.119403	0.199921	0.211224	0.028291	17
Ni	1-262352065	1	262352065	1.23e-07	0.00193739	0.114428	0.199921	0.212401	0.0305922	17
Ni	1-262352204	1	262352204	6.44e-06	0.0491976	0.117745	0.199921	0.20898	0.0256069	17
Ni	1-262352270	1	262352270	1.82e-06	0.0194875	0.114428	0.199921	0.210067	0.0274868	17
Ni	1-262352503	1	262352503	4.63e-07	0.0062382	0.119956	0.199921	0.211248	0.0282002	17
Ni	1-262352513	1	262352513	1.58e-07	0.00242677	0.128248	0.199921	0.212181	0.0282685	17
Ni	1-262363547	1	262363547	1.52e-07	0.00234397	0.117192	0.199921	0.212213	0.0298816	17
Ni	1-262363587	1	262363587	2.13e-07	0.00313299	0.116086	0.199921	0.211924	0.0296993	17
Ni	1-262363670	1	262363670	3.09e-08	0.000556333	0.112217	0.199921	0.213603	0.0321293	17
Ni	1-262363877	1	262363877	3.76e-07	0.00520438	0.129353	0.199921	0.211429	0.0268751	17
Ni	1-262363882	1	262363882	1.12e-07	0.00179466	0.120509	0.199921	0.21248	0.0295282	17
Ni	1-262364077	1	262364077	1.73e-07	0.00261824	0.116639	0.199921	0.212103	0.0299067	17
Ni	1-262364214	1	262364214	8.64e-07	0.0106893	0.121061	0.199921	0.210709	0.027301	17
Ni	1-262365044	1	262365044	2.29e-07	0.00334715	0.101714	0.199921	0.211859	0.0330516	17
Ni	1-262365311	1	262365311	8.31e-08	0.00137066	0.116086	0.199921	0.212741	0.030812	17
Ni	1-262365484	1	262365484	5.09e-08	0.00087447	0.107242	0.199921	0.213169	0.0333431	17
Ni	1-262365702	1	262365702	1.85e-07	0.00277201	0.106689	0.199921	0.212043	0.0316978	17
Ni	1-262366622	1	262366622	2.54e-07	0.00365076	0.118297	0.199921	0.211769	0.0292101	17
Ni	1-262366847	1	262366847	2.13e-07	0.00313299	0.121614	0.199921	0.211923	0.0289406	17
Ni	1-262368103	1	262368103	1.14e-07	0.00182527	0.116086	0.199921	0.212462	0.0305253	17
Ni	1-262369150	1	262369150	1.7e-07	0.00258207	0.116086	0.199921	0.212118	0.0300181	17
Ni	1-262369745	1	262369745	1.75e-07	0.00263052	0.114981	0.199921	0.212094	0.0302318	17
Ni	1-262369823	1	262369823	1.15e-07	0.00182987	0.113322	0.199921	0.212458	0.0310461	17
Ni	1-262370952	1	262370952	2.03e-06	0.0210385	0.11885	0.199921	0.209972	0.026837	17
Ni	1-262371145	1	262371145	7.04e-07	0.00899768	0.112769	0.199921	0.210886	0.0291432	17
Ni	1-262372456	1	262372456	1.1e-06	0.0131154	0.116639	0.199921	0.210497	0.0277741	17
Ni	1-262372798	1	262372798	1.23e-07	0.00193892	0.0983969	0.199921	0.212399	0.033699	17
Ni	1-262373690	1	262373690	2.01e-07	0.00296693	0.124931	0.199921	0.211974	0.0285763	17
Ni	1-262374417	1	262374417	1.16e-07	0.00184242	0.126589	0.199921	0.21245	0.0288552	17
Ni	1-262374619	1	262374619	1.12e-07	0.00179466	0.124931	0.199921	0.212479	0.0286168	17
Ni	1-262374796	1	262374796	3.54e-07	0.00493497	0.117745	0.199921	0.211481	0.0286753	17
Ni	1-262387267	1	262387267	1.19e-06	0.0139501	0.111111	0.199921	0.210436	0.0281347	17
Ni	1-262387613	1	262387613	3.78e-06	0.0335463	0.153123	0.199921	0.209437	0.0233177	17
Ni	1-262387679	1	262387679	1.35e-07	0.00209665	0.144279	0.199921	0.212317	0.0274707	17
Ni	1-262387706	1	262387706	2.48e-07	0.00357367	0.142067	0.199921	0.211789	0.0272794	17
Ni	1-262387717	1	262387717	1.25e-06	0.0146182	0.153676	0.199921	0.210389	0.0243521	17
Ni	1-262387755	1	262387755	2.89e-06	0.0275955	0.161968	0.199921	0.209668	0.0228265	17
Ni	1-262387774	1	262387774	2.09e-06	0.0214922	0.163074	0.199921	0.209949	0.0229174	17
Ni	1-262388039	1	262388039	4.44e-06	0.0375715	0.157546	0.199921	0.209299	0.0227381	17
Ni	1-262388060	1	262388060	1.44e-06	0.0164176	0.151465	0.199921	0.210266	0.0244307	17
Ni	1-262388599	1	262388599	6.21e-06	0.0481935	0.168049	0.199921	0.209012	0.0213485	17
Ni	1-262388859	1	262388859	2.59e-06	0.0256433	0.16031	0.199921	0.209761	0.0230605	17
Ni	1-262389138	1	262389138	2.77e-06	0.0267159	0.160862	0.199921	0.209705	0.0228378	17
Ni	1-262389555	1	262389555	7.01e-07	0.00897097	0.143726	0.199921	0.21089	0.0259568	17
Ni	1-262389671	1	262389671	4.04e-06	0.0351272	0.155334	0.199921	0.20938	0.0230077	17
Ni	1-262399282	1	262399282	6.57e-11	2.12e-06	0.246545	0.199921	0.219021	0.0276437	17
Ni	1-262400873	1	262400873	1.1e-08	0.000209282	0.333886	0.199921	0.214509	0.0211643	17
Ni	1-262401493	1	262401493	6.57e-11	2.12e-06	0.249309	0.199921	0.21902	0.0276291	17
Ni	1-262405148	1	262405148	5.5e-06	0.0442336	0.409619	0.199921	0.209115	0.0156293	17
Ni	1-262406277	1	262406277	1.22e-10	3.71e-06	0.232725	0.199921	0.218469	0.0281858	17
Ni	1-262412189	1	262412189	3.15e-11	1.13e-06	0.443339	0.199921	0.219674	-0.0238083	17
Ni	1-262412512	1	262412512	8.67e-12	3.62e-07	0.317302	0.199921	0.22082	0.026079	17
Ni	1-262414986	1	262414986	1.01e-12	5.32e-08	0.32283	0.199921	0.222733	0.0270879	17
Ni	1-262415204	1	262415204	5.94e-11	1.96e-06	0.446656	0.199921	0.219111	-0.0236631	17
Ni	1-262415246	1	262415246	2.45e-10	6.96e-06	0.429519	0.199921	0.217854	-0.0225065	17
Ni	1-262415276	1	262415276	2.65e-13	1.57e-08	0.313986	0.199921	0.223935	0.0283292	17
Ni	1-262415309	1	262415309	8.95e-11	2.81e-06	0.435047	0.199921	0.218747	-0.0232706	17
Ni	1-262415317	1	262415317	6.94e-13	3.91e-08	0.318961	0.199921	0.223073	0.0276639	17
Ni	1-262415651	1	262415651	1.62e-12	7.97e-08	0.317855	0.199921	0.222315	0.0271692	17
Ni	1-262415985	1	262415985	3.82e-11	1.35e-06	0.453842	0.199921	0.219501	-0.0242607	17
Ni	1-262416457	1	262416457	6.42e-13	3.64e-08	0.318961	0.199921	0.223143	0.0276248	17
Ni	1-262416896	1	262416896	2.26e-06	0.02292	0.206744	0.199921	0.20988	-0.0187008	17
Ni	1-262416913	1	262416913	1.75e-10	5.14e-06	0.44555	0.199921	0.218153	-0.0228017	17
Ni	1-262416921	1	262416921	3.45e-12	1.63e-07	0.446656	0.199921	0.22164	-0.0247619	17
Ni	1-262416990	1	262416990	7.07e-11	2.26e-06	0.442233	0.199921	0.218956	-0.0234048	17
Ni	1-262417048	1	262417048	4.9e-10	1.27e-05	0.421227	0.199921	0.217243	-0.0220062	17
Ni	1-262417261	1	262417261	5.58e-11	1.87e-06	0.441128	0.199921	0.219165	-0.0236706	17
Ni	1-262417312	1	262417312	5.91e-11	1.96e-06	0.438917	0.199921	0.219114	-0.0237003	17
Ni	1-262417353	1	262417353	1.13e-11	4.53e-07	0.446656	0.199921	0.220586	-0.024725	17
Ni	1-262417387	1	262417387	2.71e-10	7.63e-06	0.439469	0.199921	0.217767	-0.0229269	17
Ni	1-262417389	1	262417389	3.42e-11	1.22e-06	0.451078	0.199921	0.2196	-0.024244	17
Ni	1-262417667	1	262417667	5.82e-13	3.38e-08	0.318961	0.199921	0.22323	0.0277402	17
Ni	1-262417817	1	262417817	4.24e-10	1.12e-05	0.433941	0.199921	0.217371	-0.0225914	17
Ni	1-262417897	1	262417897	3.56e-10	9.68e-06	0.4356	0.199921	0.217526	-0.0227175	17
Ni	1-262417922	1	262417922	1.99e-10	5.75e-06	0.439469	0.199921	0.21804	-0.023063	17
Ni	1-262418066	1	262418066	1.93e-11	7.26e-07	0.485351	0.199921	0.22011	-0.0245092	17
Ni	1-262418114	1	262418114	8.41e-09	0.000164426	0.327805	0.199921	0.214742	-0.0208519	17
Ni	1-262418157	1	262418157	9.2e-08	0.00150189	0.352128	0.199921	0.212652	-0.0189798	17
Ni	1-262418324	1	262418324	6.22e-08	0.00105152	0.316197	0.199921	0.212992	-0.0201136	17
Ni	1-262418616	1	262418616	2.65e-11	9.7e-07	0.426202	0.199921	0.219826	-0.0236779	17
Ni	1-262418654	1	262418654	4.35e-06	0.0371839	0.100055	0.199921	0.209316	-0.0247312	17
Ni	1-262418699	1	262418699	1.21e-07	0.00191773	0.347706	0.199921	0.212414	-0.0180022	17
Ni	1-262418728	1	262418728	1.09e-09	2.61e-05	0.451078	0.199921	0.216535	-0.0216861	17
Ni	1-262418765	1	262418765	1.05e-09	2.53e-05	0.34052	0.199921	0.21657	-0.0212083	17
Ni	1-262418794	1	262418794	5.75e-09	0.000115545	0.379768	0.199921	0.215076	-0.0198884	17
Ni	1-262418910	1	262418910	1.62e-13	9.91e-09	0.31675	0.199921	0.224377	0.0285383	17
Ni	1-262419008	1	262419008	1.02e-12	5.32e-08	0.451078	0.199921	0.222729	-0.0260585	17
Ni	1-262419120	1	262419120	1.65e-13	1e-08	0.31675	0.199921	0.224358	0.0285823	17
Ni	1-262419264	1	262419264	1.02e-09	2.46e-05	0.405749	0.199921	0.216598	-0.0217031	17
Ni	1-262419297	1	262419297	2.13e-12	1.03e-07	0.4555	0.199921	0.222073	-0.0258199	17
Ni	1-262419382	1	262419382	1.47e-11	5.73e-07	0.44168	0.199921	0.220348	-0.0246617	17
Ni	1-262419415	1	262419415	1.42e-12	7.1e-08	0.450525	0.199921	0.222435	-0.0260781	17
Ni	1-262419428	1	262419428	2.48e-09	5.41e-05	0.401879	0.199921	0.215814	-0.0212363	17
Ni	1-262419461	1	262419461	1.71e-10	5.05e-06	0.422886	0.199921	0.218172	-0.0230835	17
Ni	1-262419480	1	262419480	2.83e-09	6.08e-05	0.39414	0.199921	0.215699	-0.0211044	17
Ni	1-262419550	1	262419550	4.8e-06	0.0398106	0.189055	0.199921	0.209233	-0.0189856	17
Ni	1-262419551	1	262419551	4.75e-11	1.64e-06	0.439469	0.199921	0.219309	-0.0239451	17
Ni	1-262419862	1	262419862	6.08e-12	2.67e-07	0.443892	0.199921	0.221136	-0.025156	17
Ni	1-262419956	1	262419956	3.86e-12	1.79e-07	0.450525	0.199921	0.221541	-0.0254754	17
Ni	1-262419966	1	262419966	1.16e-10	3.54e-06	0.42178	0.199921	0.218517	-0.0233305	17
Ni	1-262419997	1	262419997	1.78e-10	5.2e-06	0.423438	0.199921	0.21814	-0.022953	17
Ni	1-262420020	1	262420020	5.96e-11	1.96e-06	0.438364	0.199921	0.219107	-0.0237878	17
Ni	1-262420050	1	262420050	8.56e-12	3.59e-07	0.449972	0.199921	0.220831	-0.0249701	17
Ni	1-262420377	1	262420377	2.23e-09	4.93e-05	0.412383	0.199921	0.215906	-0.0214722	17
Ni	1-262420389	1	262420389	2.85e-09	6.08e-05	0.400774	0.199921	0.215694	-0.0212172	17
Ni	1-262420392	1	262420392	3.4e-07	0.00476745	0.150359	0.199921	0.211517	-0.0233985	17
Ni	1-262420398	1	262420398	1.03e-09	2.49e-05	0.410724	0.199921	0.216587	-0.0218621	17
Ni	1-262420402	1	262420402	1.24e-09	2.95e-05	0.402432	0.199921	0.216423	-0.0216771	17
Ni	1-262420428	1	262420428	6.04e-10	1.55e-05	0.413488	0.199921	0.217058	-0.0221838	17
Ni	1-262420457	1	262420457	5.95e-11	1.96e-06	0.437258	0.199921	0.219109	-0.0237195	17
Ni	1-262420471	1	262420471	8.52e-10	2.11e-05	0.415146	0.199921	0.216755	-0.0220318	17
Ni	1-262420477	1	262420477	6.95e-09	0.00013794	0.399116	0.199921	0.214909	-0.0206272	17
Ni	1-262420566	1	262420566	1.99e-11	7.46e-07	0.437811	0.199921	0.22008	-0.0243627	17
Ni	1-262420616	1	262420616	1.88e-09	4.23e-05	0.402432	0.199921	0.216059	-0.0213953	17
Ni	1-262420636	1	262420636	7.23e-12	3.12e-07	0.436705	0.199921	0.220982	-0.0249261	17
Ni	1-262420646	1	262420646	8.19e-10	2.03e-05	0.415699	0.199921	0.21679	-0.0220382	17
Ni	1-262420689	1	262420689	5.86e-12	2.58e-07	0.449972	0.199921	0.221169	-0.025212	17
Ni	1-262420694	1	262420694	1.91e-09	4.29e-05	0.402985	0.199921	0.216044	-0.0214186	17
Ni	1-262420758	1	262420758	4.79e-11	1.64e-06	0.425097	0.199921	0.219302	-0.0237781	17
Ni	1-262420769	1	262420769	1.73e-11	6.62e-07	0.436153	0.199921	0.220204	-0.0244931	17
Ni	1-262420805	1	262420805	4.44e-10	1.17e-05	0.416252	0.199921	0.217331	-0.0224823	17
Ni	1-262420897	1	262420897	1.93e-11	7.26e-07	0.450525	0.199921	0.220109	-0.024586	17
Ni	1-262420953	1	262420953	6.93e-11	2.22e-06	0.438917	0.199921	0.218973	-0.0237816	17
Ni	1-262462471	1	262462471	9.19e-09	0.000179217	0.387507	0.199921	0.214664	-0.0206458	17
Ni	1-262462497	1	262462497	1.51e-08	0.000282144	0.403538	0.199921	0.214232	-0.0204254	17
Ni	1-262462506	1	262462506	1.96e-12	9.57e-08	0.32283	0.199921	0.222146	0.0269317	17
Ni	1-262462518	1	262462518	4.92e-08	0.000847405	0.399116	0.199921	0.213198	-0.0196939	17
Ni	1-262463736	1	262463736	5.1e-08	0.000874582	0.372582	0.199921	0.213166	-0.0195035	17
Ni	1-262463782	1	262463782	3.79e-08	0.000671323	0.391376	0.199921	0.213424	-0.0198014	17
Ni	1-262463785	1	262463785	1.61e-08	0.00030147	0.376451	0.199921	0.214172	-0.0202775	17
Ni	1-262463836	1	262463836	5.68e-08	0.000964524	0.393035	0.199921	0.213071	-0.0195118	17
Ni	1-262463904	1	262463904	1.82e-09	4.12e-05	0.380873	0.199921	0.216086	-0.0216072	17
Ni	1-262463966	1	262463966	8.14e-13	4.49e-08	0.321725	0.199921	0.22293	0.0273815	17
Ni	1-262464014	1	262464014	2.27e-09	4.97e-05	0.351023	0.199921	0.215893	-0.0215212	17
Ni	1-262484218	1	262484218	4.69e-10	1.23e-05	0.423991	0.199921	0.217282	-0.0224847	17
Ni	1-262541893	1	262541893	1.2e-11	4.79e-07	0.347153	0.199921	0.220529	0.024828	17
Ni	1-262542181	1	262542181	2e-12	9.73e-08	0.341072	0.199921	0.222126	0.0260081	17
Ni	1-262542205	1	262542205	1.09e-08	0.000208678	0.404643	0.199921	0.214513	-0.0204847	17
Ni	1-262542286	1	262542286	1.57e-09	3.62e-05	0.422886	0.199921	0.216219	-0.0215368	17
Ni	1-262542338	1	262542338	1.3e-09	3.04e-05	0.405196	0.199921	0.216385	-0.0216091	17
Ni	1-262542452	1	262542452	2.84e-08	0.00051368	0.393035	0.199921	0.213677	-0.0198811	17
Ni	1-262542608	1	262542608	1.57e-06	0.0175048	0.357656	0.199921	0.210194	-0.0170082	17
Ni	1-262542801	1	262542801	4.02e-06	0.0350473	0.351023	0.199921	0.209384	-0.0163446	17
Ni	1-262544328	1	262544328	2.92e-12	1.38e-07	0.339967	0.199921	0.221789	0.0258667	17
Ni	1-262545539	1	262545539	5.18e-09	0.000105038	0.359315	0.199921	0.215167	0.0208152	17
Ni	1-262548107	1	262548107	3.07e-09	6.51e-05	0.362631	0.199921	0.215627	0.0213706	17
Ni	1-262550293	1	262550293	2.21e-14	1.55e-09	0.276396	0.199921	0.226162	0.0309997	17
Ni	1-262550786	1	262550786	4.16e-11	1.47e-06	0.344389	0.199921	0.219426	0.0242167	17
Ni	1-262551822	1	262551822	4.05e-12	1.87e-07	0.343836	0.199921	0.221497	0.0254959	17
Ni	1-262553137	1	262553137	4.45e-12	2e-07	0.344942	0.199921	0.221414	0.0254858	17
Ni	1-262553358	1	262553358	6.79e-12	2.95e-07	0.339414	0.199921	0.221037	0.0253531	17
Ni	1-262553986	1	262553986	5.6e-12	2.48e-07	0.344389	0.199921	0.221209	0.0253636	17
Ni	1-262554787	1	262554787	8.34e-12	3.54e-07	0.349917	0.199921	0.220854	0.0251688	17
Ni	1-262555425	1	262555425	4.28e-12	1.96e-07	0.348811	0.199921	0.22145	0.0254398	17
Ni	1-262555751	1	262555751	1.88e-06	0.019863	0.305694	0.199921	0.21004	-0.0181743	17
Ni	1-262557134	1	262557134	1.87e-07	0.00278793	0.268657	0.199921	0.212035	-0.0202027	17
Ni	1-262558051	1	262558051	4.67e-08	0.000805972	0.416252	0.199921	0.213244	0.0183511	17
Ni	1-262564076	1	262564076	2.96e-07	0.00421005	0.370923	0.199921	0.211636	-0.0195419	17
Ni	1-262564558	1	262564558	3.75e-09	7.82e-05	0.371476	0.199921	0.215451	-0.0230814	17
Ni	1-262564813	1	262564813	5.8e-08	0.000982056	0.420122	0.199921	0.213054	-0.0202768	17
Ni	1-262565560	1	262565560	8.11e-08	0.00134603	0.378109	0.199921	0.212762	-0.0205489	17
Ni	1-262567165	1	262567165	2.18e-10	6.25e-06	0.358209	0.199921	0.217957	-0.025474	17
Ni	1-262567237	1	262567237	8.28e-07	0.0103644	0.205638	0.199921	0.210745	-0.0198821	17
Ni	1-262567265	1	262567265	4.29e-07	0.00585578	0.268104	0.199921	0.211316	-0.0188643	17
Ni	1-262567268	1	262567268	5.26e-11	1.77e-06	0.354339	0.199921	0.219218	-0.0265585	17
Ni	1-262567334	1	262567334	1.68e-06	0.0184396	0.262023	0.199921	0.210135	-0.0179655	17
Ni	1-262567899	1	262567899	4.89e-07	0.006505	0.448867	0.199921	0.211202	-0.0180803	17
Ni	1-262568488	1	262568488	2.29e-11	8.49e-07	0.344389	0.199921	0.219958	-0.0275718	17
Ni	1-262571284	1	262571284	2.25e-06	0.0228871	0.329464	0.199921	0.209884	-0.0167174	17
Ni	1-262571730	1	262571730	1.74e-06	0.0188615	0.337756	0.199921	0.210106	-0.0169513	17
Ni	1-262572048	1	262572048	5.16e-06	0.042096	0.327253	0.199921	0.209171	-0.0161517	17
Ni	1-262572388	1	262572388	6.5e-06	0.0494024	0.328911	0.199921	0.208972	-0.0160375	17
Ni	1-262572396	1	262572396	3.56e-06	0.0321843	0.300719	0.199921	0.209489	-0.0166345	17
Ni	1-262576209	1	262576209	3.87e-10	1.04e-05	0.418463	0.199921	0.217452	-0.0228778	17
Ni	1-262576429	1	262576429	2.96e-06	0.02798	0.334439	0.199921	0.209646	-0.0166248	17
Ni	1-262576974	1	262576974	1.37e-06	0.015781	0.301271	0.199921	0.210309	-0.0173691	17
Ni	1-262586827	1	262586827	4.62e-06	0.0387535	0.333886	0.199921	0.209266	-0.0162915	17
Ni	1-262588070	1	262588070	5.48e-06	0.0441469	0.327253	0.199921	0.209119	-0.0162674	17
Ni	1-262588577	1	262588577	6.37e-08	0.00107174	0.351023	0.199921	0.212972	-0.0191669	17
Ni	1-262589188	1	262589188	4.05e-08	0.000706641	0.285793	0.199921	0.213368	-0.0203424	17
Ni	1-262590656	1	262590656	4.82e-09	9.85e-05	0.313433	0.199921	0.21523	-0.0209134	17
Ni	1-262590701	1	262590701	1.61e-09	3.7e-05	0.309563	0.199921	0.216193	-0.0216207	17
Ni	1-262590739	1	262590739	6.37e-09	0.000127064	0.312327	0.199921	0.214986	-0.0207319	17
Ni	1-262590763	1	262590763	6.64e-06	0.049944	0.165837	0.199921	0.208954	-0.0195262	17
Ni	1-262590796	1	262590796	5.95e-06	0.0466907	0.0779436	0.199921	0.209049	-0.0261466	17
Ni	1-262590901	1	262590901	6.16e-13	3.55e-08	0.378662	0.199921	0.223179	-0.026034	17
Ni	1-262590968	1	262590968	5.21e-09	0.000105243	0.274737	0.199921	0.215163	-0.0223118	17
Ni	1-262590971	1	262590971	1.01e-11	4.16e-07	0.363184	0.199921	0.220686	-0.0242408	17
Ni	1-262591940	1	262591940	1.08e-09	2.59e-05	0.283582	0.199921	0.216545	-0.0230591	17
Ni	1-262592030	1	262592030	3.4e-09	7.15e-05	0.281924	0.199921	0.215537	-0.0222844	17
Ni	1-262592310	1	262592310	8.71e-13	4.7e-08	0.381426	0.199921	0.22287	-0.0258142	17
Ni	1-262592335	1	262592335	1.44e-07	0.00223494	0.221669	0.199921	0.212259	-0.0208886	17
Ni	1-262592797	1	262592797	8.35e-13	4.54e-08	0.378662	0.199921	0.222908	-0.0258102	17
Ni	1-262592810	1	262592810	1.89e-07	0.00281414	0.222775	0.199921	0.212025	-0.0211857	17
Ni	1-262594245	1	262594245	3.58e-06	0.0322591	0.189608	0.199921	0.209485	-0.0193403	17
Ni	1-262596774	1	262596774	1.34e-11	5.28e-07	0.406302	0.199921	0.220432	-0.0239047	17
Ni	1-262596919	1	262596919	2.43e-11	8.94e-07	0.402985	0.199921	0.219903	-0.0235929	17
Ni	1-262600007	1	262600007	9.95e-12	4.13e-07	0.377557	0.199921	0.220697	-0.0243083	17
Ni	1-262600068	1	262600068	1.12e-11	4.53e-07	0.379768	0.199921	0.22059	-0.0242372	17
Ni	1-262600406	1	262600406	5.24e-12	2.34e-07	0.371476	0.199921	0.221269	-0.0245937	17
Ni	1-262637367	1	262637367	2.72e-06	0.0264689	0.0856827	0.199921	0.20972	-0.0256874	17
Ni	1-262639138	1	262639138	5.14e-06	0.0420781	0.179657	0.199921	0.209174	-0.0195177	17
Ni	1-262639491	1	262639491	6.63e-06	0.049944	0.17026	0.199921	0.208955	-0.019457	17
Ni	1-262639708	1	262639708	5.19e-11	1.76e-06	0.310669	0.199921	0.21923	-0.0236701	17
Ni	1-262639976	1	262639976	1.54e-12	7.69e-08	0.28911	0.199921	0.222359	-0.0260797	17
Ni	1-262640203	1	262640203	3.55e-12	1.66e-07	0.396352	0.199921	0.221616	-0.0265979	17
Ni	1-262640541	1	262640541	4.61e-06	0.0387004	0.0746269	0.199921	0.209268	-0.026414	17
Ni	1-262640547	1	262640547	1.99e-09	4.45e-05	0.325594	0.199921	0.216007	-0.0218899	17
Ni	1-262640745	1	262640745	5.51e-06	0.0442336	0.133776	0.199921	0.209115	-0.0208177	17
Ni	1-262640761	1	262640761	2.32e-10	6.61e-06	0.268104	0.199921	0.217904	-0.02449	17
Ni	1-262640985	1	262640985	1.98e-06	0.020673	0.0757324	0.199921	0.209994	-0.028268	17
Ni	1-262641187	1	262641187	6.51e-06	0.0494024	0.063571	0.199921	0.208972	-0.0288053	17
Ni	1-262641407	1	262641407	6.27e-10	1.6e-05	0.295191	0.199921	0.217025	-0.0234124	17
Ni	1-262642061	1	262642061	6.58e-09	0.000131	0.222222	0.199921	0.214957	-0.0225929	17
Ni	1-262642425	1	262642425	1.72e-07	0.00260957	0.300719	0.199921	0.212107	-0.0192866	17
Ni	1-262642429	1	262642429	3.06e-10	8.49e-06	0.27916	0.199921	0.21766	-0.0241281	17
Ni	1-262643051	1	262643051	4.08e-06	0.0353722	0.222222	0.199921	0.209371	-0.0184731	17
Ni	1-262643053	1	262643053	9.77e-09	0.00018903	0.248756	0.199921	0.214611	-0.0223489	17
Ni	1-262643145	1	262643145	1.87e-07	0.00278793	0.305694	0.199921	0.212036	-0.0187023	17
Ni	1-262643753	1	262643753	1.37e-11	5.37e-07	0.341072	0.199921	0.220413	-0.0247438	17
Ni	1-262643817	1	262643817	1.31e-12	6.6e-08	0.247651	0.199921	0.222507	-0.0276295	17
Ni	1-262643967	1	262643967	1.23e-13	7.77e-09	0.366501	0.199921	0.224624	-0.0264878	17
Ni	1-262644060	1	262644060	6.22e-06	0.0481935	0.177999	0.199921	0.209011	-0.0187899	17
Ni	1-262644348	1	262644348	7.85e-13	4.36e-08	0.353787	0.199921	0.222963	-0.0257104	17
Ni	1-262644762	1	262644762	2.73e-08	0.000494717	0.244334	0.199921	0.213712	-0.0214006	17
Ni	1-262644839	1	262644839	2.38e-12	1.14e-07	0.318961	0.199921	0.221974	-0.0251915	17
Ni	1-262644984	1	262644984	4.26e-14	2.81e-09	0.330569	0.199921	0.225575	-0.0279885	17
Ni	1-262645301	1	262645301	7.84e-12	3.36e-07	0.352128	0.199921	0.220909	-0.024434	17
Ni	1-262645913	1	262645913	1.74e-07	0.00262395	0.294085	0.199921	0.212099	-0.0192484	17
Ni	1-262646138	1	262646138	2.89e-12	1.38e-07	0.289663	0.199921	0.2218	-0.0261714	17
Ni	1-262646270	1	262646270	1.14e-12	5.78e-08	0.37037	0.199921	0.222631	-0.0256494	17
Ni	1-262646485	1	262646485	2.44e-13	1.46e-08	0.324489	0.199921	0.224009	-0.0270861	17
Ni	1-262646532	1	262646532	2.15e-11	8.01e-07	0.348259	0.199921	0.220013	-0.0242216	17
Ni	1-262646555	1	262646555	5.97e-11	1.96e-06	0.395246	0.199921	0.219106	-0.0250923	17
Ni	1-262646683	1	262646683	6.38e-15	4.92e-10	0.372582	0.199921	0.227283	-0.028049	17
Ni	1-262646774	1	262646774	3.57e-15	2.84e-10	0.345495	0.199921	0.227805	-0.0289378	17
Ni	1-262647181	1	262647181	1.96e-14	1.39e-09	0.364842	0.199921	0.226274	-0.0274524	17
Ni	1-262647426	1	262647426	7.8e-15	5.9e-10	0.363184	0.199921	0.227102	-0.0279218	17
Ni	1-262647649	1	262647649	3.02e-14	2.05e-09	0.362631	0.199921	0.225882	-0.0272677	17
Ni	1-262648243	1	262648243	1.1e-12	5.64e-08	0.363737	0.199921	0.222665	-0.0256103	17
Ni	1-262648729	1	262648729	5.96e-16	5.35e-11	0.327253	0.199921	0.229423	-0.030156	17
Ni	1-262648738	1	262648738	2.04e-15	1.72e-10	0.305694	0.199921	0.228309	-0.0300212	17
Ni	1-262648911	1	262648911	1.86e-10	5.42e-06	0.316197	0.199921	0.218099	-0.02307	17
Ni	1-262649205	1	262649205	1.54e-13	9.51e-09	0.355998	0.199921	0.22442	-0.0264118	17
Ni	1-262650488	1	262650488	2.82e-11	1.03e-06	0.304588	0.199921	0.219771	-0.0244752	17
Ni	1-262650726	1	262650726	1.13e-12	5.78e-08	0.351023	0.199921	0.222637	-0.0257149	17
Ni	1-262651923	1	262651923	2.1e-06	0.0216304	0.0773908	0.199921	0.209941	-0.0275373	17
Ni	1-262652248	1	262652248	2.98e-11	1.08e-06	0.326147	0.199921	0.219724	-0.0241018	17
Ni	1-262652769	1	262652769	4.2e-13	2.46e-08	0.375898	0.199921	0.223521	-0.0260877	17
Ni	1-262655089	1	262655089	1.09e-20	2.17e-15	0.381979	0.199921	0.239366	-0.0341183	17
Ni	1-262655289	1	262655289	6.43e-08	0.00107877	0.181316	0.199921	0.212964	-0.0230668	17
Ni	1-262655308	1	262655308	1.46e-08	0.000274896	0.194583	0.199921	0.214257	-0.0236539	17
Ni	1-262655404	1	262655404	1.94e-06	0.0203308	0.117745	0.199921	0.210013	-0.0255227	17
Ni	1-262655450	1	262655450	9.95e-10	2.42e-05	0.263129	0.199921	0.216619	-0.0235821	17
Ni	1-262655458	1	262655458	8.93e-10	2.19e-05	0.26147	0.199921	0.216714	-0.0236017	17
Ni	1-262655751	1	262655751	1.58e-20	2.89e-15	0.366501	0.199921	0.239026	-0.0339732	17
Ni	1-262655820	1	262655820	1.91e-07	0.00283383	0.187396	0.199921	0.212016	-0.0222363	17
Ni	1-262655844	1	262655844	4.19e-07	0.00575374	0.119956	0.199921	0.211335	-0.0268272	17
Ni	1-262655911	1	262655911	1.11e-18	1.3e-13	0.356551	0.199921	0.235135	-0.0322823	17
Ni	1-262655942	1	262655942	1.31e-07	0.00203539	0.187949	0.199921	0.212345	-0.0225379	17
Ni	1-262655976	1	262655976	4.25e-07	0.00582086	0.181316	0.199921	0.211324	-0.0216533	17
Ni	1-262655995	1	262655995	7.69e-07	0.00973675	0.117745	0.199921	0.210809	-0.0264466	17
Ni	1-262656751	1	262656751	3.05e-19	4.05e-14	0.353234	0.199921	0.236316	-0.032959	17
Ni	1-262656763	1	262656763	6.11e-16	5.42e-11	0.317855	0.199921	0.2294	-0.0299132	17
Ni	1-262656773	1	262656773	8.34e-07	0.010395	0.123273	0.199921	0.21074	-0.0257274	17
Ni	1-262656788	1	262656788	4.13e-07	0.00567922	0.12272	0.199921	0.211348	-0.0265158	17
Ni	1-262657132	1	262657132	1.06e-16	1.06e-11	0.329464	0.199921	0.230988	-0.0303619	17
Ni	1-262658122	1	262658122	8.58e-07	0.0106462	0.120509	0.199921	0.210715	-0.0258632	17
Ni	1-262658158	1	262658158	7.5e-07	0.00954898	0.123825	0.199921	0.210832	-0.0256669	17
Ni	1-262658206	1	262658206	3.91e-07	0.0053861	0.129353	0.199921	0.211396	-0.0255678	17
Ni	1-262658209	1	262658209	1.5e-07	0.00231455	0.189608	0.199921	0.212227	-0.0224523	17
Ni	1-262658238	1	262658238	1.65e-07	0.00251468	0.117192	0.199921	0.212145	-0.0279287	17
Ni	1-262658255	1	262658255	5.74e-07	0.00750134	0.120509	0.199921	0.211062	-0.0262518	17
Ni	1-262658283	1	262658283	4.91e-21	1.05e-15	0.377004	0.199921	0.240102	-0.0342199	17
Ni	1-262658311	1	262658311	2.05e-15	1.72e-10	0.318961	0.199921	0.228307	-0.0292396	17
Ni	1-262658313	1	262658313	9.07e-07	0.0110428	0.119403	0.199921	0.210667	-0.0261466	17
Ni	1-262658408	1	262658408	7.53e-07	0.00957727	0.175235	0.199921	0.210828	-0.0216085	17
Ni	1-262658423	1	262658423	3.62e-06	0.0325293	0.106136	0.199921	0.209474	-0.0235016	17
Ni	1-262658861	1	262658861	1.81e-06	0.0194853	0.128248	0.199921	0.210069	-0.0243082	17
Ni	1-262658870	1	262658870	3.96e-08	0.000694144	0.208402	0.199921	0.213388	-0.0227227	17
Ni	1-262658920	1	262658920	2.9e-15	2.33e-10	0.318961	0.199921	0.227994	-0.0290041	17
Ni	1-262658943	1	262658943	4.14e-16	3.8e-11	0.331122	0.199921	0.229754	-0.0298631	17
Ni	1-262658974	1	262658974	4.51e-07	0.00610196	0.129906	0.199921	0.211271	-0.025498	17
Ni	1-262658975	1	262658975	9.47e-07	0.011456	0.126036	0.199921	0.21063	-0.0253007	17
Ni	1-262659011	1	262659011	2.64e-07	0.00379048	0.116086	0.199921	0.211735	-0.0279679	17
Ni	1-262659061	1	262659061	1.7e-06	0.0185467	0.118297	0.199921	0.210127	-0.0256439	17
Ni	1-262659065	1	262659065	1.61e-20	2.89e-15	0.37424	0.199921	0.239012	-0.033884	17
Ni	1-262659082	1	262659082	3.55e-16	3.35e-11	0.31675	0.199921	0.229891	-0.0301909	17
Ni	1-262659447	1	262659447	1.12e-11	4.53e-07	0.271421	0.199921	0.220588	-0.0253267	17
Ni	1-262659469	1	262659469	4.66e-09	9.54e-05	0.203427	0.199921	0.21526	-0.0240913	17
Ni	1-262659586	1	262659586	2.58e-08	0.000470376	0.212825	0.199921	0.21376	-0.0223222	17
Ni	1-262659620	1	262659620	1.21e-06	0.0141745	0.192924	0.199921	0.21042	-0.0205964	17
Ni	1-262659633	1	262659633	3.34e-10	9.15e-06	0.228303	0.199921	0.217581	-0.0254063	17
Ni	1-262659647	1	262659647	3.65e-10	9.88e-06	0.245992	0.199921	0.217504	-0.0250283	17
Ni	1-262659657	1	262659657	8.58e-08	0.00140865	0.209508	0.199921	0.212713	-0.0223256	17
Ni	1-262659747	1	262659747	6.8e-10	1.73e-05	0.236595	0.199921	0.216954	-0.0244227	17
Ni	1-262659774	1	262659774	2.6e-09	5.65e-05	0.218905	0.199921	0.215774	-0.0243974	17
Ni	1-262659775	1	262659775	8.71e-08	0.00142763	0.196241	0.199921	0.2127	-0.0223698	17
Ni	1-262659777	1	262659777	1.07e-09	2.56e-05	0.212272	0.199921	0.216556	-0.0251691	17
Ni	1-262659783	1	262659783	1.12e-11	4.53e-07	0.296849	0.199921	0.220595	-0.0251076	17
Ni	1-262659827	1	262659827	2.91e-07	0.00415169	0.191819	0.199921	0.21165	-0.0218599	17
Ni	1-262659832	1	262659832	5.09e-11	1.73e-06	0.250415	0.199921	0.219248	-0.0256591	17
Ni	1-262659903	1	262659903	1.95e-14	1.39e-09	0.279713	0.199921	0.226276	-0.0292618	17
Ni	1-262659959	1	262659959	4.17e-09	8.59e-05	0.242123	0.199921	0.215357	-0.0221509	17
Ni	1-262659986	1	262659986	1.02e-09	2.46e-05	0.213378	0.199921	0.2166	-0.0247544	17
Ni	1-262660050	1	262660050	1.06e-16	1.06e-11	0.416252	0.199921	0.230991	-0.0289759	17
Ni	1-262660252	1	262660252	3.01e-14	2.05e-09	0.34052	0.199921	0.225886	-0.0278756	17
Ni	1-262660403	1	262660403	2.76e-15	2.24e-10	0.367606	0.199921	0.228038	-0.0286722	17
Ni	1-262665955	1	262665955	9.42e-08	0.00153436	0.198452	0.199921	0.212631	-0.0223474	17
Ni	1-262665961	1	262665961	1.07e-11	4.38e-07	0.266446	0.199921	0.220635	-0.0253876	17
Ni	1-262665964	1	262665964	7.51e-13	4.2e-08	0.257601	0.199921	0.223002	-0.02707	17
Ni	1-262666022	1	262666022	9.83e-09	0.000189651	0.248756	0.199921	0.214606	-0.0214378	17
Ni	1-262666042	1	262666042	1.82e-11	6.93e-07	0.218905	0.199921	0.220159	-0.0266764	17
Ni	1-262666282	1	262666282	9.73e-07	0.0116965	0.109453	0.199921	0.210607	-0.0275767	17
Ni	1-262666290	1	262666290	2.58e-15	2.12e-10	0.379768	0.199921	0.228099	-0.0282738	17
Ni	1-262666315	1	262666315	2.11e-06	0.0216957	0.12272	0.199921	0.209938	-0.0245776	17
Ni	1-262666370	1	262666370	6.3e-17	6.57e-12	0.339967	0.199921	0.231459	-0.0305795	17
Ni	1-262666417	1	262666417	2.74e-21	6.05e-16	0.369818	0.199921	0.240637	-0.0345699	17
Ni	1-262666445	1	262666445	1.49e-06	0.0167918	0.114428	0.199921	0.210241	-0.0262864	17
Ni	1-262666581	1	262666581	1.6e-06	0.0178202	0.114428	0.199921	0.210175	-0.0259385	17
Ni	1-262666630	1	262666630	2.75e-06	0.0266119	0.116086	0.199921	0.20971	-0.025091	17
Ni	1-262667180	1	262667180	4.06e-17	4.29e-12	0.347706	0.199921	0.231859	-0.0304995	17
Ni	1-262667192	1	262667192	6.81e-07	0.00874252	0.148701	0.199921	0.210915	-0.022758	17
Ni	1-262667206	1	262667206	1.64e-17	1.81e-12	0.342731	0.199921	0.232683	-0.0309484	17
Ni	1-262667339	1	262667339	3.13e-08	0.000561825	0.195135	0.199921	0.213592	-0.0234148	17
Ni	1-262667347	1	262667347	1.33e-08	0.000251368	0.206191	0.199921	0.214342	-0.0234672	17
Ni	1-262667381	1	262667381	2.75e-06	0.0266119	0.115533	0.199921	0.209711	-0.0252917	17
Ni	1-262684676	1	262684676	1.32e-09	3.1e-05	0.185185	0.199921	0.216367	-0.0266936	17
Ni	1-262684807	1	262684807	9e-11	2.81e-06	0.199558	0.199921	0.218742	-0.0275042	17
Ni	1-262685161	1	262685161	5.53e-20	9.08e-15	0.366501	0.199921	0.237879	-0.03317	17
Ni	1-262685577	1	262685577	4.23e-10	1.12e-05	0.175788	0.199921	0.217373	-0.0265728	17
Ni	1-262685827	1	262685827	4.62e-08	0.00080192	0.228303	0.199921	0.213252	-0.0215698	17
Ni	1-262685830	1	262685830	9.84e-20	1.52e-14	0.365395	0.199921	0.237351	-0.0328828	17
Ni	1-262685980	1	262685980	1.87e-06	0.0198542	0.1288	0.199921	0.210044	-0.0227353	17
Ni	1-262685999	1	262685999	6.64e-20	1.07e-14	0.348259	0.199921	0.237711	-0.0327699	17
Ni	1-262686030	1	262686030	1.82e-08	0.000338462	0.201216	0.199921	0.214064	-0.0230447	17
Ni	1-262686061	1	262686061	2.51e-10	7.08e-06	0.200663	0.199921	0.217836	-0.0253684	17
Ni	1-262686064	1	262686064	3.71e-18	4.15e-13	0.323936	0.199921	0.234034	-0.0312297	17
Ni	1-262686132	1	262686132	4.98e-06	0.0410643	0.123825	0.199921	0.209201	-0.0235007	17
Ni	1-262686138	1	262686138	7.51e-10	1.87e-05	0.172471	0.199921	0.216867	-0.0261922	17
Ni	1-262686145	1	262686145	2.69e-18	3.05e-13	0.430625	0.199921	0.234328	-0.0312397	17
Ni	1-262686159	1	262686159	3.96e-06	0.0346253	0.151465	0.199921	0.209398	-0.0213591	17
Ni	1-262686257	1	262686257	6.15e-06	0.0478456	0.113875	0.199921	0.209019	-0.0245707	17
Ni	1-262686262	1	262686262	3.68e-17	3.95e-12	0.29906	0.199921	0.231947	-0.030744	17
Ni	1-262686267	1	262686267	4.64e-08	0.000803183	0.141515	0.199921	0.213249	-0.0261898	17
Ni	1-262686334	1	262686334	6.14e-06	0.0477567	0.12272	0.199921	0.209022	-0.0234039	17
Ni	1-262687469	1	262687469	1.91e-08	0.000353036	0.145937	0.199921	0.214025	-0.0250957	17
Ni	1-262687543	1	262687543	3.84e-06	0.0338708	0.0934218	0.199921	0.209425	-0.0257559	17
Ni	1-262687635	1	262687635	3.04e-09	6.47e-05	0.180763	0.199921	0.215634	-0.0247134	17
Ni	1-262687823	1	262687823	2.06e-08	0.000377389	0.133776	0.199921	0.213959	-0.027136	17
Ni	1-262688659	1	262688659	8.55e-12	3.59e-07	0.294638	0.199921	0.220833	-0.0251791	17
Ni	1-262689392	1	262689392	3.56e-16	3.35e-11	0.397457	0.199921	0.229891	-0.0292624	17
Ni	1-262689580	1	262689580	2.69e-06	0.0263901	0.110006	0.199921	0.209729	-0.0260468	17
Ni	1-262689590	1	262689590	6.43e-16	5.64e-11	0.390271	0.199921	0.229355	-0.0290474	17
Ni	1-262689688	1	262689688	9.63e-17	9.91e-12	0.424544	0.199921	0.231074	-0.0304652	17
Ni	1-262689695	1	262689695	5.23e-20	8.79e-15	0.443339	0.199921	0.237929	-0.0332647	17
Ni	1-262689820	1	262689820	1.63e-16	1.62e-11	0.397457	0.199921	0.230596	-0.0296789	17
Ni	1-262689983	1	262689983	1.7e-11	6.53e-07	0.323383	0.199921	0.220221	-0.0243789	17
Ni	1-262690575	1	262690575	1.54e-18	1.77e-13	0.442233	0.199921	0.234839	-0.0318232	17
Ni	1-262690592	1	262690592	9.84e-16	8.53e-11	0.399116	0.199921	0.22897	-0.0289303	17
Ni	1-262690743	1	262690743	2.84e-09	6.08e-05	0.210614	0.199921	0.215695	-0.0242555	17
Ni	1-262691119	1	262691119	1.4e-19	2.12e-14	0.44168	0.199921	0.237028	-0.0326941	17
Ni	1-262691206	1	262691206	1.1e-18	1.3e-13	0.442233	0.199921	0.235146	-0.0318162	17
Ni	1-262691316	1	262691316	2.96e-19	4e-14	0.441128	0.199921	0.236344	-0.0322997	17
Ni	1-262691349	1	262691349	2.76e-16	2.7e-11	0.401879	0.199921	0.230119	-0.0293928	17
Ni	1-262712355	1	262712355	2.05e-17	2.23e-12	0.423438	0.199921	0.232477	-0.0304068	17
Ni	1-262819319	1	262819319	2.47e-22	5.96e-17	0.454395	0.199921	0.242857	-0.0355293	17
Ni	1-262819724	1	262819724	4.89e-16	4.44e-11	0.410171	0.199921	0.229602	-0.029162	17
Ni	1-262820160	1	262820160	2.58e-24	8.3e-19	0.464345	0.199921	0.247081	-0.0375641	17
Ni	1-262821084	1	262821084	4.02e-23	1.14e-17	0.499171	0.199921	0.244536	-0.0355704	17
Ni	1-262880415	1	262880415	4.96e-19	6.28e-14	0.408513	0.199921	0.23587	-0.0325467	17
Ni	1-262880579	1	262880579	3.66e-23	1.09e-17	0.440022	0.199921	0.244621	-0.0366154	17
Ni	1-262880686	1	262880686	2.57e-25	1.42e-19	0.470426	0.199921	0.249226	-0.0387029	17
Ni	1-262880694	1	262880694	3.09e-19	4.05e-14	0.420122	0.199921	0.236303	-0.0324907	17
Ni	1-262891225	1	262891225	8.91e-25	3.82e-19	0.463239	0.199921	0.248069	-0.0378145	17
Ni	1-262891535	1	262891535	1.52e-19	2.26e-14	0.323383	0.199921	0.236952	-0.0385906	17
Ni	1-262892619	1	262892619	2.2e-26	6.75e-20	0.466003	0.199921	0.251519	-0.0395178	17
Ni	1-262892802	1	262892802	1.27e-25	9.78e-20	0.462687	0.199921	0.249885	-0.0385755	17
Ni	1-262892856	1	262892856	2.21e-15	1.84e-10	0.271973	0.199921	0.228237	-0.029753	17
Ni	1-262892859	1	262892859	4.88e-20	8.57e-15	0.406855	0.199921	0.237992	-0.0326797	17
Ni	1-262893249	1	262893249	1.89e-10	5.47e-06	0.202322	0.199921	0.218087	-0.0262544	17
Ni	1-262893446	1	262893446	1.32e-14	9.91e-10	0.276949	0.199921	0.226626	-0.0287474	17
Ni	1-262893500	1	262893500	1.61e-14	1.18e-09	0.28524	0.199921	0.226448	-0.0284289	17
Ni	1-262893573	1	262893573	2.03e-10	5.85e-06	0.201216	0.199921	0.218022	-0.0262282	17
Ni	1-262893725	1	262893725	1.98e-26	6.75e-20	0.46932	0.199921	0.251618	-0.0395473	17
Ni	1-262893821	1	262893821	6.59e-26	7.27e-20	0.466003	0.199921	0.250494	-0.0387275	17
Ni	1-262894010	1	262894010	5.54e-15	4.36e-10	0.265893	0.199921	0.22741	-0.029371	17
Ni	1-262894069	1	262894069	7.52e-15	5.74e-10	0.274185	0.199921	0.227135	-0.0289981	17
Ni	1-262894102	1	262894102	3.55e-08	0.000631743	0.110006	0.199921	0.213482	0.0332242	17
Ni	1-262894251	1	262894251	2.98e-26	6.75e-20	0.46932	0.199921	0.251234	-0.0395613	17
Ni	1-262895331	1	262895331	4.61e-26	6.75e-20	0.46932	0.199921	0.250827	-0.0391351	17
Ni	1-262895428	1	262895428	4.09e-25	2.1e-19	0.45937	0.199921	0.248794	-0.0381179	17
Ni	1-262896042	1	262896042	1.05e-25	8.97e-20	0.466003	0.199921	0.250064	-0.0387489	17
Ni	1-262896079	1	262896079	7.43e-19	8.96e-14	0.409619	0.199921	0.235502	-0.0316368	17
Ni	1-262896275	1	262896275	1.77e-14	1.29e-09	0.268104	0.199921	0.226365	-0.0288911	17
Ni	1-262896569	1	262896569	1.44e-25	1.01e-19	0.467109	0.199921	0.249768	-0.0384186	17
Ni	1-262896883	1	262896883	1.82e-13	1.1e-08	0.271973	0.199921	0.224269	-0.0276222	17
Ni	1-262897138	1	262897138	2.49e-14	1.72e-09	0.272526	0.199921	0.226056	-0.0285587	17
Ni	1-262897773	1	262897773	3.37e-16	3.25e-11	0.273079	0.199921	0.22994	-0.0307284	17
Ni	1-262898024	1	262898024	7.04e-25	3.2e-19	0.467109	0.199921	0.248288	-0.0382332	17
Ni	1-262898196	1	262898196	5.25e-26	6.75e-20	0.481481	0.199921	0.250707	-0.0386484	17
Ni	1-262900110	1	262900110	1.87e-25	1.14e-19	0.465451	0.199921	0.249524	-0.0387736	17
Ni	1-262900123	1	262900123	2.56e-19	3.53e-14	0.423991	0.199921	0.236476	-0.0326294	17
Ni	1-262900304	1	262900304	1.88e-14	1.36e-09	0.278607	0.199921	0.226309	-0.0282943	17
Ni	1-262900880	1	262900880	2.12e-24	7.45e-19	0.459923	0.199921	0.247261	-0.0372928	17
Ni	1-262900905	1	262900905	3.71e-26	6.75e-20	0.466003	0.199921	0.251032	-0.0391729	17
Ni	1-262901770	1	262901770	5.63e-15	4.39e-10	0.280818	0.199921	0.227395	-0.0290984	17
Ni	1-262901863	1	262901863	2.89e-22	6.76e-17	0.42178	0.199921	0.242712	-0.0351223	17
Ni	1-262902643	1	262902643	3.08e-22	6.99e-17	0.440575	0.199921	0.242653	-0.0348872	17
Ni	1-262902645	1	262902645	4.15e-23	1.14e-17	0.449972	0.199921	0.244506	-0.0359329	17
Ni	1-262902772	1	262902772	1.59e-11	6.15e-07	0.208402	0.199921	0.220278	-0.0274589	17
Ni	1-262923852	1	262923852	1.57e-14	1.17e-09	0.27529	0.199921	0.226471	-0.028684	17
Ni	1-262972878	1	262972878	5.91e-23	1.47e-17	0.446656	0.199921	0.244178	-0.036531	17
Ni	1-262973002	1	262973002	1.57e-09	3.62e-05	0.225539	0.199921	0.216217	-0.0238447	17
Ni	1-262973004	1	262973004	9.67e-26	8.97e-20	0.454947	0.199921	0.250136	-0.0389299	17
Ni	1-262973018	1	262973018	8.88e-11	2.8e-06	0.232172	0.199921	0.218753	-0.0253108	17
Ni	1-262973048	1	262973048	5.35e-19	6.66e-14	0.392482	0.199921	0.235802	-0.0315426	17
Ni	1-262973103	1	262973103	4.87e-25	2.35e-19	0.458264	0.199921	0.248631	-0.0380012	17
Ni	1-262973179	1	262973179	2.31e-19	3.25e-14	0.393035	0.199921	0.236568	-0.0315857	17
Ni	1-262973333	1	262973333	4.53e-23	1.18e-17	0.405749	0.199921	0.244424	-0.0360636	17
Ni	1-262973366	1	262973366	2.03e-19	2.95e-14	0.418463	0.199921	0.236689	-0.0319787	17
Ni	1-262973507	1	262973507	6.25e-06	0.0482108	0.187949	0.199921	0.209007	-0.018067	17
Ni	1-262973529	1	262973529	6.21e-21	1.3e-15	0.420122	0.199921	0.239885	-0.0334383	17
Ni	1-262973554	1	262973554	3.41e-10	9.31e-06	0.201769	0.199921	0.217562	-0.0256975	17
Ni	1-262973562	1	262973562	1.03e-24	4.19e-19	0.441128	0.199921	0.247932	-0.0375468	17
Ni	1-262973576	1	262973576	1.61e-10	4.75e-06	0.199005	0.199921	0.218229	-0.0263008	17
Ni	1-262973583	1	262973583	1.92e-25	1.14e-19	0.447208	0.199921	0.249498	-0.0385911	17
Ni	1-262973604	1	262973604	3.91e-10	1.05e-05	0.200663	0.199921	0.217443	-0.0256661	17
Ni	1-262973679	1	262973679	5.24e-20	8.79e-15	0.391929	0.199921	0.237929	-0.0334596	17
Ni	1-262973686	1	262973686	9.28e-11	2.89e-06	0.206744	0.199921	0.218715	-0.0262663	17
Ni	1-262973692	1	262973692	4.24e-10	1.12e-05	0.202322	0.199921	0.21737	-0.0255845	17
Ni	1-262973753	1	262973753	4.22e-19	5.43e-14	0.376451	0.199921	0.236018	-0.0319054	17
Ni	1-262975178	1	262975178	1.81e-24	6.66e-19	0.446103	0.199921	0.24741	-0.0372479	17
Ni	1-262975426	1	262975426	3.22e-10	8.9e-06	0.221669	0.199921	0.217615	-0.0248742	17
Ni	1-262975535	1	262975535	2.35e-24	7.87e-19	0.444444	0.199921	0.247169	-0.0371013	17
Ni	1-262975537	1	262975537	8.39e-09	0.000164322	0.202322	0.199921	0.214745	-0.0236437	17
Ni	1-262975575	1	262975575	5.34e-09	0.000107689	0.224986	0.199921	0.21514	-0.0230304	17
Ni	1-262975621	1	262975621	4.58e-23	1.18e-17	0.432283	0.199921	0.244414	-0.0356666	17
Ni	1-262975756	1	262975756	2.24e-23	6.92e-18	0.451078	0.199921	0.245076	-0.0366115	17
Ni	1-262975757	1	262975757	6.6e-11	2.12e-06	0.220011	0.199921	0.219017	-0.0260931	17
Ni	1-262975942	1	262975942	7.12e-10	1.8e-05	0.263129	0.199921	0.216914	-0.0232345	17
Ni	1-262976015	1	262976015	2.26e-09	4.97e-05	0.26921	0.199921	0.215895	-0.0228428	17
Ni	1-262976035	1	262976035	2.72e-08	0.000494717	0.250415	0.199921	0.213714	-0.0213626	17
Ni	1-262976241	1	262976241	1.01e-12	5.32e-08	0.321172	0.199921	0.222734	-0.0260898	17
Ni	1-262976831	1	262976831	1.48e-24	5.73e-19	0.4555	0.199921	0.247594	-0.0373117	17
Ni	1-262976907	1	262976907	3.12e-14	2.09e-09	0.343284	0.199921	0.225855	-0.0278943	17
Ni	1-262977401	1	262977401	6.5e-10	1.65e-05	0.306799	0.199921	0.216995	-0.0223868	17
Ni	1-262977518	1	262977518	7.63e-07	0.00967576	0.18408	0.199921	0.210816	-0.0208264	17
Ni	1-262977646	1	262977646	4.98e-06	0.0410643	0.173024	0.199921	0.2092	-0.0195394	17
Ni	1-262991494	1	262991494	1.84e-06	0.0195969	0.209508	0.199921	0.210058	-0.020095	17
Ni	1-262991560	1	262991560	2.54e-06	0.0251616	0.214483	0.199921	0.20978	-0.0194586	17
Ni	1-262991572	1	262991572	4.49e-07	0.00608541	0.195688	0.199921	0.211275	-0.0213979	17
Ni	1-262991584	1	262991584	1.25e-07	0.00196199	0.228856	0.199921	0.212387	-0.0214015	17
Ni	1-262991680	1	262991680	4.99e-14	3.24e-09	0.338861	0.199921	0.225432	-0.0269996	17
Ni	1-262991866	1	262991866	1.14e-20	2.21e-15	0.42178	0.199921	0.239325	-0.0337697	17
Ni	1-262991892	1	262991892	8.29e-21	1.68e-15	0.441128	0.199921	0.23962	-0.0336717	17
Ni	1-262991949	1	262991949	9.49e-20	1.49e-14	0.313986	0.199921	0.237384	-0.0395616	17
Ni	1-262991953	1	262991953	5.98e-06	0.0468451	0.216694	0.199921	0.209045	-0.0184209	17
Ni	1-262992047	1	262992047	1.5e-20	2.82e-15	0.461028	0.199921	0.239077	-0.0339484	17
Ni	1-262992664	1	262992664	5.66e-08	0.00096208	0.394693	0.199921	0.213076	-0.0203502	17
Ni	1-262992733	1	262992733	2.21e-19	3.16e-14	0.307352	0.199921	0.236609	-0.0394712	17
Ni	1-262992754	1	262992754	6.26e-19	7.68e-14	0.309563	0.199921	0.235658	-0.0386506	17
Ni	1-262992901	1	262992901	3.92e-16	3.65e-11	0.290768	0.199921	0.229802	-0.0364643	17
Ni	1-262993013	1	262993013	2.31e-07	0.00336339	0.221117	0.199921	0.21185	-0.0211104	17
Ni	1-262993349	1	262993349	4.38e-11	1.54e-06	0.31288	0.199921	0.219381	-0.023956	17
Ni	1-262993353	1	262993353	2.85e-10	7.99e-06	0.310116	0.199921	0.217723	-0.0229433	17
Ni	1-262993528	1	262993528	8.4e-08	0.00138189	0.443892	0.199921	0.212732	-0.0187623	17
Ni	1-262993583	1	262993583	1.14e-10	3.5e-06	0.278607	0.199921	0.218531	-0.0241192	17
Ni	1-262993585	1	262993585	1.37e-09	3.19e-05	0.229961	0.199921	0.216339	-0.0242882	17
Ni	1-262994054	1	262994054	2.48e-14	1.72e-09	0.330017	0.199921	0.226061	-0.0323451	17
Ni	1-262994105	1	262994105	4.61e-14	3.02e-09	0.338861	0.199921	0.225503	-0.0313726	17
Ni	1-262994111	1	262994111	8.03e-07	0.0100911	0.469873	0.199921	0.210773	-0.0175975	17
Ni	1-262994252	1	262994252	1.63e-15	1.4e-10	0.330569	0.199921	0.228514	-0.0339503	17
Ni	1-262994373	1	262994373	7.7e-08	0.00128356	0.334439	0.199921	0.212807	-0.0195465	17
Ni	1-262994395	1	262994395	6.32e-12	2.76e-07	0.369265	0.199921	0.221101	-0.0272557	17
Ni	1-262994425	1	262994425	5.89e-07	0.00764082	0.301271	0.199921	0.21104	-0.018529	17
Ni	1-262994427	1	262994427	8.14e-07	0.0102043	0.291874	0.199921	0.21076	-0.0183556	17
Ni	1-262995786	1	262995786	3.17e-13	1.87e-08	0.348811	0.199921	0.223775	-0.029728	17
Ni	1-262995867	1	262995867	3.89e-08	0.000685129	0.305694	0.199921	0.213403	-0.0202787	17
Ni	1-262995879	1	262995879	9.88e-14	6.36e-09	0.36042	0.199921	0.224818	-0.0298263	17
Ni	1-262995880	1	262995880	1.44e-13	8.98e-09	0.349364	0.199921	0.224479	-0.030102	17
Ni	1-262996344	1	262996344	1.6e-12	7.9e-08	0.329464	0.199921	0.222328	-0.025562	17
Ni	1-262996377	1	262996377	4.49e-10	1.18e-05	0.356551	0.199921	0.217321	-0.0221931	17
Ni	1-262996447	1	262996447	3.18e-14	2.12e-09	0.357103	0.199921	0.225837	-0.0306562	17
Ni	1-262996583	1	262996583	1.31e-10	3.92e-06	0.342731	0.199921	0.218413	-0.0229536	17
Ni	1-262996875	1	262996875	4.97e-07	0.00659927	0.440575	0.199921	0.211188	-0.0181954	17
Ni	1-262996902	1	262996902	9.99e-13	5.32e-08	0.359315	0.199921	0.222747	-0.0286017	17
Ni	1-262996932	1	262996932	2.06e-06	0.0213005	0.468214	0.199921	0.209958	-0.0168191	17
Ni	1-262997038	1	262997038	9.39e-07	0.0113762	0.458817	0.199921	0.210637	-0.0173998	17
Ni	1-262997112	1	262997112	1.61e-09	3.69e-05	0.386954	0.199921	0.216196	-0.0230903	17
Ni	1-262997118	1	262997118	1.76e-09	4e-05	0.396904	0.199921	0.216115	-0.0228284	17
Ni	1-262997178	1	262997178	4.33e-08	0.000753645	0.268104	0.199921	0.213308	-0.0207652	17
Ni	1-262997260	1	262997260	2.07e-10	5.94e-06	0.379215	0.199921	0.218005	-0.0246618	17
Ni	1-262997291	1	262997291	4.91e-10	1.27e-05	0.405196	0.199921	0.217241	-0.023482	17
Ni	1-262997302	1	262997302	1.68e-07	0.00256432	0.273632	0.199921	0.212126	-0.0197124	17
Ni	1-262997754	1	262997754	8.1e-11	2.56e-06	0.377557	0.199921	0.218836	-0.0254024	17
Ni	1-262997755	1	262997755	8.95e-10	2.19e-05	0.377004	0.199921	0.216712	-0.0218937	17
Ni	1-262997915	1	262997915	3.16e-07	0.00447043	0.440575	0.199921	0.211581	-0.0185647	17
Ni	1-262998101	1	262998101	1.98e-09	4.43e-05	0.434494	0.199921	0.216012	-0.0220884	17
Ni	1-262999352	1	262999352	3.51e-07	0.00490872	0.404643	0.199921	0.211489	-0.0194486	17
Ni	1-263004175	1	263004175	3.8e-08	0.000671323	0.400774	0.199921	0.213423	-0.0210598	17
Ni	1-263005771	1	263005771	1.26e-11	4.99e-07	0.351575	0.199921	0.220486	-0.0279777	17
Ni	1-263006480	1	263006480	1.26e-07	0.00197416	0.401879	0.199921	0.21238	-0.0200373	17
Ni	1-263006705	1	263006705	1.41e-09	3.28e-05	0.456053	0.199921	0.216312	-0.0204883	17
Ni	1-263007181	1	263007181	1.68e-08	0.00031274	0.428966	0.199921	0.214138	-0.0196347	17
Ni	1-263007299	1	263007299	2.3e-07	0.00335944	0.491432	0.199921	0.211854	-0.0182898	17
Ni	1-263007872	1	263007872	8.22e-08	0.00135912	0.335545	0.199921	0.21275	-0.0198143	17
Ni	1-263007993	1	263007993	1.09e-07	0.00175349	0.400774	0.199921	0.212504	-0.0201174	17
Ni	1-263008190	1	263008190	4.48e-07	0.00607449	0.400774	0.199921	0.211278	-0.0191165	17
Ni	1-263009456	1	263009456	4.65e-07	0.0062382	0.400221	0.199921	0.211246	-0.0190169	17
Ni	1-263009799	1	263009799	1.75e-07	0.00263052	0.400221	0.199921	0.212094	-0.0197866	17
Ni	1-263010138	1	263010138	8.93e-08	0.00146054	0.453289	0.199921	0.212678	-0.0196011	17
Ni	1-263010291	1	263010291	1.16e-06	0.0137473	0.408513	0.199921	0.210451	-0.0181613	17
Ni	1-263011107	1	263011107	1.64e-07	0.00250315	0.324489	0.199921	0.21215	0.0197375	17
Ni	1-263011378	1	263011378	1.39e-08	0.000262053	0.489221	0.199921	0.214303	0.0196203	17
Ni	1-263011396	1	263011396	3.35e-06	0.0307203	0.32283	0.199921	0.209542	0.0162177	17
Ni	1-263011417	1	263011417	9.36e-07	0.0113591	0.474848	0.199921	0.21064	0.0170274	17
Ni	1-263011626	1	263011626	1.87e-09	4.22e-05	0.28911	0.199921	0.216063	0.0240312	17
Ni	1-263012184	1	263012184	2.35e-06	0.0236799	0.405749	0.199921	0.209845	0.0164126	17
Ni	1-263016810	1	263016810	4.35e-06	0.0371555	0.351575	0.199921	0.209318	0.017078	17
Ni	1-263016872	1	263016872	1.38e-06	0.0158643	0.337756	0.199921	0.210303	0.0183501	17
Ni	1-263239480	1	263239480	2.5e-08	0.000455784	0.33665	0.199921	0.21379	-0.0200408	17
Ni	1-263240120	1	263240120	6.92e-07	0.00887095	0.339414	0.199921	0.210901	-0.0186205	17
Ni	1-263241818	1	263241818	3.4e-07	0.00476745	0.412383	0.199921	0.211518	-0.0178831	17
Ni	1-263241944	1	263241944	3.61e-06	0.0325024	0.480376	0.199921	0.209476	-0.0167262	17
Ni	1-263246366	1	263246366	5.73e-07	0.00749972	0.482587	0.199921	0.211064	-0.0187999	17
Ni	1-263246755	1	263246755	4.73e-06	0.0394732	0.483693	0.199921	0.209245	-0.0167592	17
Ni	1-263247303	1	263247303	5.16e-06	0.042096	0.493643	0.199921	0.209171	-0.0168113	17
Ni	1-263251038	1	263251038	1.71e-06	0.0186593	0.436153	0.199921	0.210121	-0.0169959	17
Ni	1-263253484	1	263253484	5e-07	0.00662672	0.490326	0.199921	0.211183	-0.0185305	17
Ni	1-263253836	1	263253836	6.25e-06	0.0482108	0.453842	0.199921	0.209007	-0.0160949	17
Ni	1-263270042	1	263270042	8.97e-07	0.0109684	0.489773	0.199921	0.210677	-0.0178588	17
Ni	1-263270401	1	263270401	4.58e-06	0.038502	0.469873	0.199921	0.209273	-0.0164251	17
Ni	1-263284276	1	263284276	1.27e-07	0.00198517	0.477612	0.199921	0.212373	-0.0192444	17
Ni	1-263285518	1	263285518	1.6e-07	0.0024459	0.482034	0.199921	0.212172	-0.0189743	17
Ni	1-263285850	1	263285850	2.21e-07	0.00324027	0.479823	0.199921	0.211891	-0.0186797	17
Ni	1-263291059	1	263291059	9.04e-10	2.21e-05	0.4555	0.199921	0.216704	-0.0218012	17
Ni	1-263291117	1	263291117	2.41e-07	0.00348964	0.456053	0.199921	0.211815	-0.0185917	17
Ni	1-263295351	1	263295351	1.45e-06	0.0164902	0.370923	0.199921	0.210259	-0.0173782	17
Ni	1-263306153	1	263306153	6.45e-06	0.0491993	0.221669	0.199921	0.208979	-0.0192912	17
Ni	1-263995514	1	263995514	6.06e-07	0.00784745	0.138198	0.199921	0.211016	0.0278407	18
Ni	1-264059480	1	264059480	4.42e-06	0.0375148	0.318961	0.199921	0.209303	0.0169214	18
Ni	1-264701399	1	264701399	1.31e-07	0.00203539	0.223881	0.199921	0.212344	0.0222448	18
Ni	1-264713002	1	264713002	3.88e-06	0.0341419	0.331122	0.199921	0.209415	0.0166641	18
Ni	1-264714879	1	264714879	4.92e-06	0.0407037	0.332228	0.199921	0.209211	0.0164221	18
Ni	1-264715055	1	264715055	1.34e-06	0.0154988	0.155887	0.199921	0.210328	0.0248899	18
Ni	1-264715068	1	264715068	3.02e-06	0.0283516	0.149254	0.199921	0.209631	0.0245826	18
Ni	1-264849792	1	264849792	2.7e-06	0.0263915	0.137092	0.199921	0.209725	0.0261262	18
Ni	1-264849994	1	264849994	5.4e-06	0.0435251	0.143173	0.199921	0.209132	0.0243355	18
Ni	1-264850024	1	264850024	6.57e-06	0.0496532	0.135987	0.199921	0.208963	0.0251595	18
Ni	1-264867148	1	264867148	1.32e-06	0.0153563	0.239359	0.199921	0.21034	0.0200478	18
Ni	1-264867168	1	264867168	8.54e-07	0.0106139	0.236595	0.199921	0.210719	0.0202485	18
Ni	1-264869358	1	264869358	8.66e-07	0.0106893	0.154229	0.199921	0.210707	0.0255143	18
Ni	1-264869753	1	264869753	2.94e-06	0.0278675	0.159204	0.199921	0.209653	0.023856	18
Ni	1-264870033	1	264870033	2.49e-06	0.0247208	0.155334	0.199921	0.209797	0.0238143	18
Ni	1-264870103	1	264870103	3.94e-06	0.0345618	0.148148	0.199921	0.209401	0.0241995	18
Ni	1-264870317	1	264870317	1.45e-06	0.0164892	0.153123	0.199921	0.210261	0.0250056	18
Ni	1-264870491	1	264870491	1.62e-06	0.0179102	0.144279	0.199921	0.210166	0.0256802	18
Ni	1-264870592	1	264870592	4.47e-06	0.0376796	0.155334	0.199921	0.209294	0.023264	18
Ni	1-264870634	1	264870634	2.74e-06	0.0265642	0.149254	0.199921	0.209715	0.0246151	18
Ni	1-264871074	1	264871074	3.62e-06	0.0325024	0.145937	0.199921	0.209476	0.0246217	18
Ni	1-264871152	1	264871152	3.13e-06	0.0290318	0.148148	0.199921	0.209599	0.0244772	18
Ni	1-264871529	1	264871529	6.21e-06	0.0481935	0.158651	0.199921	0.209012	0.022696	18
Ni	1-264872321	1	264872321	2.16e-06	0.0221334	0.147595	0.199921	0.209919	0.0250053	18
Ni	1-264872335	1	264872335	1.34e-06	0.0154347	0.140962	0.199921	0.210333	0.0262075	18
Ni	1-264872533	1	264872533	2.37e-06	0.0238	0.147595	0.199921	0.209837	0.0248691	18
Ni	1-264873373	1	264873373	2.16e-06	0.0221378	0.148701	0.199921	0.209917	0.0248961	18
Ni	1-264873516	1	264873516	3.35e-06	0.0307203	0.142067	0.199921	0.20954	0.0251404	18
Ni	1-264873531	1	264873531	8.05e-07	0.0101078	0.144279	0.199921	0.21077	0.0263891	18
Ni	1-264873699	1	264873699	2.03e-06	0.0210385	0.149807	0.199921	0.209971	0.0248784	18
Ni	1-264875100	1	264875100	6.47e-06	0.0492735	0.149254	0.199921	0.208977	0.0236751	18
Ni	1-264875153	1	264875153	1.58e-06	0.0175227	0.154229	0.199921	0.210191	0.0247803	18
Ni	1-264875431	1	264875431	2.34e-06	0.0235737	0.140962	0.199921	0.20985	0.0258087	18
Ni	1-264875442	1	264875442	1.84e-06	0.0195969	0.148701	0.199921	0.210058	0.0250918	18
Ni	1-264875452	1	264875452	1.03e-06	0.0123783	0.148148	0.199921	0.210554	0.0258546	18
Ni	1-264875658	1	264875658	4.65e-06	0.0389748	0.152018	0.199921	0.209259	0.0237291	18
Ni	1-264876240	1	264876240	1.35e-06	0.0155072	0.150359	0.199921	0.210326	0.0251746	18
Ni	1-264876455	1	264876455	5.81e-06	0.0458743	0.139303	0.199921	0.209069	0.0247026	18
Ni	1-264876513	1	264876513	1.22e-06	0.0142364	0.140409	0.199921	0.210414	0.0263726	18
Ni	1-264876685	1	264876685	2.98e-06	0.0280591	0.141515	0.199921	0.209643	0.0251061	18
Ni	1-264876706	1	264876706	1.7e-06	0.0185467	0.173577	0.199921	0.210127	0.0224399	18
Ni	1-264876847	1	264876847	6.29e-06	0.0483197	0.137092	0.199921	0.209001	0.0247506	18
Ni	1-264877488	1	264877488	2.17e-06	0.0221483	0.144831	0.199921	0.209915	0.0251776	18
Ni	1-264877495	1	264877495	1.08e-06	0.0128308	0.139303	0.199921	0.210519	0.0265597	18
Ni	1-264877528	1	264877528	4.18e-06	0.035974	0.14649	0.199921	0.209352	0.0242267	18
Ni	1-264877571	1	264877571	2.78e-06	0.0268	0.150912	0.199921	0.209701	0.024374	18
Ni	1-264877689	1	264877689	2.69e-06	0.0263901	0.149254	0.199921	0.20973	0.0244947	18
Ni	1-264877869	1	264877869	2.88e-06	0.027503	0.145937	0.199921	0.209673	0.0246598	18
Ni	1-264878133	1	264878133	1.46e-06	0.0164935	0.147595	0.199921	0.210258	0.0254955	18
Ni	1-264878134	1	264878134	9.75e-07	0.0117098	0.152018	0.199921	0.210604	0.025594	18
Ni	1-264878164	1	264878164	5.83e-07	0.00758399	0.145937	0.199921	0.21105	0.026496	18
Ni	1-264878314	1	264878314	4.59e-07	0.0062004	0.149254	0.199921	0.211255	0.026748	18
Ni	1-264878336	1	264878336	6.12e-06	0.0476389	0.141515	0.199921	0.209025	0.0246097	18
Ni	1-264878375	1	264878375	1.81e-06	0.0194433	0.145384	0.199921	0.210073	0.02576	18
Ni	1-264878392	1	264878392	3.51e-06	0.0318411	0.145937	0.199921	0.209502	0.0246858	18
Ni	1-264878400	1	264878400	4.45e-06	0.037616	0.138198	0.199921	0.209297	0.0254124	18
Ni	1-264878412	1	264878412	2.36e-06	0.0237182	0.150359	0.199921	0.209843	0.0247979	18
Ni	1-264878489	1	264878489	4.03e-06	0.0350826	0.145937	0.199921	0.209382	0.0245279	18
Ni	1-264878599	1	264878599	1.55e-06	0.0173198	0.153123	0.199921	0.210207	0.0248133	18
Ni	1-264879735	1	264879735	4.13e-06	0.0356479	0.150912	0.199921	0.209362	0.0236543	18
Ni	1-264880100	1	264880100	6.29e-06	0.0483197	0.153123	0.199921	0.209001	0.0233401	18
Ni	1-264880778	1	264880778	6.05e-06	0.0472828	0.154229	0.199921	0.209034	0.0233206	18
Ni	1-264882351	1	264882351	1.83e-06	0.0195965	0.149807	0.199921	0.210061	0.0249754	18
Ni	1-264882433	1	264882433	1.81e-06	0.0194433	0.148701	0.199921	0.210072	0.0250068	18
Ni	1-264882448	1	264882448	4.66e-06	0.0390033	0.153123	0.199921	0.209257	0.0236841	18
Ni	1-264903868	1	264903868	4.79e-06	0.0397935	0.154782	0.199921	0.209235	0.0235022	18
Ni	1-264904871	1	264904871	6.54e-06	0.0495777	0.192371	0.199921	0.208967	0.0202624	18
Ni	1-264920736	1	264920736	4.21e-06	0.0361772	0.167496	0.199921	0.209345	0.0221972	18
Ni	1-264920819	1	264920819	3.03e-06	0.0283859	0.13654	0.199921	0.209629	0.0260876	18
Ni	1-264920880	1	264920880	4.43e-06	0.0375251	0.161968	0.199921	0.209301	0.0232734	18
Ni	1-264920903	1	264920903	6.58e-06	0.0496532	0.138198	0.199921	0.208962	0.0249785	18
Ni	1-264920934	1	264920934	4.38e-06	0.0373205	0.14262	0.199921	0.209311	0.0251117	18
Ni	1-264921108	1	264921108	5.19e-06	0.0422852	0.183527	0.199921	0.209166	0.0207896	18
Ni	1-264932094	1	264932094	3.71e-06	0.0330498	0.166943	0.199921	0.209453	0.0228549	18
Ni	1-264932111	1	264932111	1.56e-06	0.0174172	0.162521	0.199921	0.210201	0.0243054	18
Ni	1-264932726	1	264932726	4.95e-06	0.0408866	0.151465	0.199921	0.209206	0.0240461	18
Ni	1-264934048	1	264934048	5.81e-06	0.0458743	0.145384	0.199921	0.209069	0.0246627	18
Ni	1-264935893	1	264935893	4.74e-06	0.0394732	0.158651	0.199921	0.209244	0.0233169	18
Ni	1-264971276	1	264971276	6.5e-06	0.0494024	0.140409	0.199921	0.208973	0.0246588	18
Ni	1-264973678	1	264973678	6.65e-06	0.049944	0.157546	0.199921	0.208954	0.0229842	18
Ni	1-265023338	1	265023338	2.39e-06	0.023933	0.144831	0.199921	0.20983	0.0255321	18
Ni	1-265030940	1	265030940	1.89e-06	0.0200058	0.141515	0.199921	0.210033	0.0261502	18
Ni	1-265045557	1	265045557	3.31e-06	0.0305005	0.144279	0.199921	0.20955	0.0249608	18
Ni	1-265045876	1	265045876	1.09e-06	0.0129574	0.14262	0.199921	0.210509	0.0258183	18
Ni	1-265055428	1	265055428	3.7e-06	0.032998	0.148148	0.199921	0.209457	0.0245658	18
Ni	1-265055609	1	265055609	2.68e-06	0.0263439	0.145384	0.199921	0.209732	0.0255497	18
Ni	1-266146094	1	266146094	5.64e-06	0.044905	0.177446	0.199921	0.209094	0.0223329	19
Ni	1-266271704	1	266271704	1.74e-06	0.0188615	0.186291	0.199921	0.210106	0.0228854	19
Ni	1-266272061	1	266272061	1.39e-06	0.0159289	0.184632	0.199921	0.210298	0.0232147	19
Ni	1-266420453	1	266420453	1.72e-06	0.0187492	0.378109	0.199921	0.210115	0.0175262	19
Ni	1-266424909	1	266424909	2.46e-06	0.0245094	0.210061	0.199921	0.209806	0.0206946	19
Ni	1-266424930	1	266424930	2.64e-06	0.0259911	0.226092	0.199921	0.209746	0.0199001	19
Ni	1-266631495	1	266631495	2.53e-06	0.0251364	0.155334	0.199921	0.209782	0.0257045	19
Ni	1-266830832	1	266830832	4.29e-06	0.0367838	0.193477	0.199921	0.209329	0.0214668	19
Ni	1-266832292	1	266832292	7.56e-07	0.0095989	0.196241	0.199921	0.210824	0.0228723	19
Ni	1-266842082	1	266842082	6.25e-08	0.00105266	0.167496	0.199921	0.212989	0.0265486	19
Ni	1-267126635	1	267126635	2.74e-07	0.00392197	0.160862	0.199921	0.211702	0.0277509	19
Ni	1-267139520	1	267139520	2.74e-07	0.00392197	0.160862	0.199921	0.211702	0.0277509	19
Ni	1-267204349	1	267204349	1.17e-06	0.0138223	0.164732	0.199921	0.210445	0.0255428	19
Ni	1-267325344	1	267325344	2.85e-06	0.0272641	0.174682	0.199921	0.209681	0.0234175	19
Ni	1-267325397	1	267325397	4.15e-06	0.035777	0.171918	0.199921	0.209358	0.0232642	19
Ni	1-267326651	1	267326651	5.56e-06	0.0444783	0.177999	0.199921	0.209107	0.0225187	19
Ni	1-267327068	1	267327068	2.06e-06	0.0213005	0.177446	0.199921	0.209959	0.0232037	19
Ni	1-267338757	1	267338757	3.53e-06	0.0319395	0.245992	0.199921	0.209497	0.0194392	19
Ni	1-267355829	1	267355829	2.63e-06	0.0259534	0.220011	0.199921	0.20975	0.0206212	19
Ni	1-267359574	1	267359574	1.77e-06	0.0190866	0.220011	0.199921	0.210091	0.0210321	19
Ni	1-267977896	1	267977896	2.72e-06	0.0264635	0.362631	0.199921	0.209721	-0.0183839	19
Ni	1-268009661	1	268009661	5.86e-06	0.0461835	0.301824	0.199921	0.209061	-0.0194722	19
Ni	2-19013250	2	19013250	1.14e-06	0.0134229	0.301271	0.199921	0.210473	0.0179943
Ni	2-27750075	2	27750075	5.13e-06	0.0420781	0.100055	0.199921	0.209175	0.0349028
Ni	3-191744131	3	191744131	6.36e-06	0.0488022	0.387507	0.199921	0.208991	0.0166087	20
Ni	3-191746686	3	191746686	3.53e-06	0.0319395	0.408513	0.199921	0.209497	0.0168881	20
Ni	3-191747285	3	191747285	5.24e-06	0.0425203	0.396352	0.199921	0.209158	0.0165172	20
Ni	3-191747810	3	191747810	1.56e-06	0.0174459	0.402985	0.199921	0.210198	0.0174372	20
Ni	3-191748548	3	191748548	5.75e-06	0.0455005	0.400221	0.199921	0.209078	0.0165751	20
Ni	3-191774332	3	191774332	5.87e-06	0.0461882	0.39414	0.199921	0.20906	0.0164997	20
Ni	3-191775343	3	191775343	5.71e-06	0.0453117	0.440022	0.199921	0.209084	0.0165779	20
Ni	3-206474571	3	206474571	5.86e-06	0.0461835	0.0519624	0.199921	0.209062	-0.0330178
Ni	4-807153	4	807153	1.91e-06	0.020137	0.274737	0.199921	0.210024	-0.0178795	21
Ni	4-807174	4	807174	3.49e-06	0.0317754	0.273632	0.199921	0.209506	-0.0174239	21
Ni	4-807531	4	807531	2.4e-06	0.0239729	0.286899	0.199921	0.209828	-0.0175003	21
Ni	4-807536	4	807536	2.09e-06	0.0215156	0.281371	0.199921	0.209947	-0.0177502	21
Ni	4-807545	4	807545	2.17e-06	0.0221525	0.264787	0.199921	0.209914	-0.0180578	21
Ni	4-807692	4	807692	2.39e-06	0.023933	0.281371	0.199921	0.209831	-0.0176334	21
Ni	4-807830	4	807830	3.92e-06	0.0344012	0.279713	0.199921	0.209406	-0.0172225	21
Ni	4-809493	4	809493	6.04e-06	0.0472083	0.262023	0.199921	0.209036	-0.017226	21
Ni	4-809543	4	809543	1.11e-06	0.0131764	0.268104	0.199921	0.210492	-0.0184089	21
Ni	4-809559	4	809559	6.23e-06	0.0482108	0.268104	0.199921	0.209009	-0.0169954	21
Ni	4-925658	4	925658	5.31e-06	0.0430038	0.332781	0.199921	0.209146	-0.0164195	21
Ni	4-926877	4	926877	2.34e-06	0.0235737	0.338861	0.199921	0.20985	-0.0170754	21
Ni	4-165927205	4	165927205	3.49e-06	0.0317754	0.27529	0.199921	0.209505	0.0173817
Ni	4-190508541	4	190508541	1.51e-06	0.0169457	0.0773908	0.199921	0.21023	0.0311113
Ni	4-208133980	4	208133980	6.65e-06	0.049944	0.172471	0.199921	0.208953	-0.0215184	22
Ni	4-208134057	4	208134057	5.24e-06	0.0425203	0.171918	0.199921	0.209158	-0.0216605	22
Ni	4-208141759	4	208141759	3.12e-06	0.0289948	0.160862	0.199921	0.209601	-0.0222709	22
Ni	4-217418687	4	217418687	3.11e-06	0.0289687	0.166943	0.199921	0.209604	0.0230393
Ni	5-39704602	5	39704602	5.14e-06	0.0420781	0.0326147	0.199921	0.209174	0.0415166
Ni	5-193678932	5	193678932	6.55e-06	0.0495777	0.124931	0.199921	0.208966	-0.0225525
Ni	5-211464351	5	211464351	1.77e-06	0.0190866	0.168601	0.199921	0.210092	0.022099	23
Ni	5-211643357	5	211643357	5.58e-06	0.0445537	0.121614	0.199921	0.209103	-0.0243433	23
Ni	5-211644820	5	211644820	6.54e-06	0.0495777	0.120509	0.199921	0.208967	-0.0242879	23
Ni	5-211648723	5	211648723	3.65e-06	0.0326609	0.114428	0.199921	0.209468	-0.0254815	23
Ni	5-211649214	5	211649214	9.09e-07	0.011045	0.139856	0.199921	0.210666	-0.0244147	23
Ni	5-211649252	5	211649252	4.23e-06	0.0363345	0.147043	0.199921	0.209341	-0.022595	23
Ni	5-211649534	5	211649534	2.98e-06	0.0280842	0.145384	0.199921	0.209641	-0.0229911	23
Ni	5-211649621	5	211649621	5.29e-06	0.0429283	0.113322	0.199921	0.209149	-0.0252056	23
Ni	5-211650009	5	211650009	4.8e-07	0.00639955	0.137645	0.199921	0.211217	-0.0252237	23
Ni	5-211650028	5	211650028	6.42e-06	0.0490889	0.113322	0.199921	0.208984	-0.0251183	23
Ni	5-211650289	5	211650289	4.37e-06	0.0373104	0.113322	0.199921	0.209312	-0.0255824	23
Ni	5-211650624	5	211650624	1.62e-06	0.0179102	0.117745	0.199921	0.210164	-0.0261002	23
Ni	5-211651800	5	211651800	3.22e-07	0.00455758	0.140962	0.199921	0.211562	-0.0252476	23
Ni	5-211651857	5	211651857	5.87e-07	0.00762366	0.139303	0.199921	0.211044	-0.024896	23
Ni	5-211651897	5	211651897	6.62e-06	0.0499167	0.114981	0.199921	0.208957	-0.0248701	23
Ni	5-211652008	5	211652008	3.17e-06	0.0293781	0.147595	0.199921	0.209588	-0.0227856	23
Ni	5-211652764	5	211652764	3.71e-06	0.0330323	0.333886	0.199921	0.209455	-0.017452	23
Ni	5-211652968	5	211652968	5.58e-06	0.0445537	0.114981	0.199921	0.209104	-0.0249923	23
Ni	5-211656405	5	211656405	2.7e-06	0.0263915	0.0956329	0.199921	0.209727	-0.0267635	23
Ni	5-212355229	5	212355229	4.9e-06	0.0405208	0.0602543	0.199921	0.209215	0.0339166	24
Ni	5-212357967	5	212357967	7.84e-07	0.00988864	0.0613599	0.199921	0.210793	0.0357808	24
Ni	5-214748391	5	214748391	1.01e-06	0.0121254	0.370923	0.199921	0.210573	-0.0177886	25
Ni	5-214755681	5	214755681	1.61e-06	0.0178489	0.358209	0.199921	0.210172	-0.0175129	25
Ni	5-214755971	5	214755971	1.57e-06	0.0175227	0.359315	0.199921	0.210191	-0.0174803	25
Ni	5-214756229	5	214756229	2.59e-06	0.0256096	0.358762	0.199921	0.209763	-0.0171365	25
Ni	5-214756488	5	214756488	5.34e-06	0.0431702	0.380873	0.199921	0.209141	-0.0164074	25
Ni	5-214756610	5	214756610	1.91e-06	0.020137	0.365395	0.199921	0.210026	-0.017309	25
Ni	5-214756636	5	214756636	3.82e-06	0.033748	0.383637	0.199921	0.209429	-0.0166017	25
Ni	5-214756797	5	214756797	2.79e-06	0.0268417	0.355445	0.199921	0.209699	-0.0170998	25
Ni	5-214756828	5	214756828	3.44e-06	0.0314011	0.374793	0.199921	0.209519	-0.0168192	25
Ni	5-214756838	5	214756838	1.28e-06	0.0148794	0.357103	0.199921	0.210371	-0.0176821	25
Ni	5-214756847	5	214756847	3.79e-06	0.0336188	0.363184	0.199921	0.209435	-0.0168567	25
Ni	5-214756918	5	214756918	4.69e-07	0.00627674	0.36042	0.199921	0.211237	-0.0183357	25
Ni	5-214759161	5	214759161	3.59e-06	0.0323322	0.385296	0.199921	0.209482	-0.0163357	25
Ni	6-152417696	6	152417696	9.04e-07	0.0110304	0.0116086	0.199921	0.210669	-0.0698779	26	Ni-3
Ni	6-152447200	6	152447200	1.2e-06	0.0140875	0.0127142	0.199921	0.210426	-0.0659231	26	Ni-3
Ni	6-152449587	6	152449587	9.04e-07	0.0110304	0.0116086	0.199921	0.210669	-0.0698779	26	Ni-3
Ni	6-152465811	6	152465811	2.9e-06	0.0276105	0.0138198	0.199921	0.209666	-0.060595	26	Ni-3
Ni	6-152482649	6	152482649	5.75e-06	0.0455155	0.0143726	0.199921	0.209077	-0.0585561	26	Ni-3
Ni	6-152511145	6	152511145	1.61e-06	0.0178694	0.0127142	0.199921	0.21017	-0.0655647	26	Ni-3
Ni	6-152541547	6	152541547	4.21e-06	0.0361772	0.0127142	0.199921	0.209346	-0.0635189	26	Ni-3
Ni	7-132972802	7	132972802	6.37e-06	0.0488483	0.288557	0.199921	0.208989	-0.0171309
Ni	8-75823465	8	75823465	5.38e-06	0.0434798	0.0287452	0.199921	0.209134	0.0442101
Ni	8-158459453	8	158459453	5.09e-06	0.0418432	0.42178	0.199921	0.209182	-0.0157737	27
Ni	8-158506825	8	158506825	4.02e-06	0.0350351	0.320066	0.199921	0.209386	-0.0167769	27
Ni	8-158507309	8	158507309	1.27e-06	0.0148519	0.263682	0.199921	0.210374	-0.0187216	27
Ni	8-158507334	8	158507334	4.39e-06	0.0373527	0.267551	0.199921	0.209309	-0.01749	27
Ni	8-158509330	8	158509330	5.49e-06	0.0441543	0.273079	0.199921	0.209118	-0.0173683	27
Ni	8-158518528	8	158518528	5.98e-06	0.0468451	0.309011	0.199921	0.209045	-0.0167177	27
Ni	8-158526184	8	158526184	6.43e-06	0.04911	0.310669	0.199921	0.208983	-0.0166313	27
Ni	8-158527296	8	158527296	4.49e-06	0.0378231	0.318408	0.199921	0.209289	-0.016814	27
Ni	8-158527564	8	158527564	6.51e-06	0.0494024	0.283582	0.199921	0.208972	-0.0171028	27
Ni	8-158527858	8	158527858	4.77e-06	0.0397034	0.282477	0.199921	0.209237	-0.0173663	27
Ni	8-158527913	8	158527913	3.01e-06	0.0283411	0.319514	0.199921	0.209632	-0.0171701	27
Ni	8-158528638	8	158528638	4.06e-06	0.0352534	0.31675	0.199921	0.209376	-0.0169152	27
Ni	8-158528685	8	158528685	4.82e-06	0.03995	0.281371	0.199921	0.209228	-0.0174236	27
Ni	8-158528896	8	158528896	3.04e-06	0.0284866	0.272526	0.199921	0.209624	-0.0179878	27
Ni	8-158529177	8	158529177	5.52e-06	0.0443102	0.268657	0.199921	0.209112	-0.0173118	27
Ni	8-158531217	8	158531217	4.09e-06	0.0354077	0.239912	0.199921	0.20937	-0.0181901	27
Ni	8-158532068	8	158532068	1.12e-06	0.0132327	0.262576	0.199921	0.210487	-0.0187983	27
Ni	8-158532093	8	158532093	2.94e-06	0.0278675	0.268104	0.199921	0.209653	-0.0177332	27
Ni	8-158532152	8	158532152	5.21e-06	0.0424222	0.236595	0.199921	0.209161	-0.0180394	27
Ni	8-158532232	8	158532232	4.3e-06	0.0367838	0.232725	0.199921	0.209327	-0.0181903	27
Ni	8-158532416	8	158532416	5.56e-06	0.0444783	0.275843	0.199921	0.209107	-0.0170933	27
Ni	8-158532434	8	158532434	5.01e-06	0.0412544	0.263129	0.199921	0.209195	-0.0177072	27
Ni	8-158532601	8	158532601	1.5e-06	0.0169301	0.278607	0.199921	0.210233	-0.0182947	27
Ni	8-158533012	8	158533012	1.81e-06	0.0194433	0.280818	0.199921	0.210073	-0.0181558	27
Ni	8-158534087	8	158534087	6.28e-06	0.0483197	0.274185	0.199921	0.209002	-0.0170684	27
Ni	8-158534481	8	158534481	3.22e-06	0.0297242	0.279713	0.199921	0.209576	-0.0175629	27
Ni	8-158534486	8	158534486	4.63e-06	0.0388021	0.27916	0.199921	0.209264	-0.0173239	27
Ni	8-158534509	8	158534509	1.75e-06	0.0189405	0.280265	0.199921	0.2101	-0.0182167	27
Ni	8-158534942	8	158534942	5.32e-06	0.0430424	0.278054	0.199921	0.209145	-0.0172629	27
Ni	8-158559011	8	158559011	1.68e-06	0.0184396	0.211719	0.199921	0.210134	-0.0198446	27
Ni	8-158559400	8	158559400	4.06e-06	0.0352534	0.272526	0.199921	0.209375	-0.0178141	27
Ni	8-158559851	8	158559851	4.12e-06	0.0356172	0.240464	0.199921	0.209364	-0.0182346	27
Ni	8-165144266	8	165144266	3.66e-06	0.0326961	0.248756	0.199921	0.209466	-0.0170545
Ni	9-325582	9	325582	4.47e-06	0.0376796	0.493643	0.199921	0.209294	-0.0158822
Ni	9-739264	9	739264	5.75e-07	0.00750235	0.480929	0.199921	0.211061	-0.0171623
Ni	9-739493	9	739493	4.38e-07	0.00595689	0.477059	0.199921	0.211296	-0.0173703	28
Ni	9-739610	9	739610	1.32e-06	0.0153528	0.454395	0.199921	0.210341	-0.0166839	28
Ni	9-739722	9	739722	3.58e-07	0.00498445	0.47927	0.199921	0.211471	-0.0174983	28
Ni	9-739848	9	739848	3.53e-07	0.00492554	0.478165	0.199921	0.211484	-0.0174684	28
Ni	9-744871	9	744871	2.67e-09	5.75e-05	0.481481	0.199921	0.21575	-0.0189438	28
Ni	9-745054	9	745054	1.39e-10	4.14e-06	0.494748	0.199921	0.218359	-0.0203253	28
Ni	9-745061	9	745061	3.27e-10	9.02e-06	0.497512	0.199921	0.2176	-0.0199157	28
Ni	9-745078	9	745078	1.17e-10	3.57e-06	0.425097	0.199921	0.218506	-0.0208302	28
Ni	9-745561	9	745561	2.04e-09	4.54e-05	0.474295	0.199921	0.215985	-0.0190661	28
Ni	9-745575	9	745575	5.14e-08	0.000880511	0.495854	0.199921	0.213159	-0.0173976	28
Ni	9-745607	9	745607	1.99e-08	0.000366027	0.372582	0.199921	0.21399	-0.018421	28
Ni	9-754607	9	754607	7.37e-10	1.84e-05	0.473742	0.199921	0.216883	-0.0197041	28
Ni	9-762932	9	762932	4.39e-06	0.0373622	0.321172	0.199921	0.209308	-0.0154112	28
Ni	9-762965	9	762965	1.98e-08	0.000366027	0.490326	0.199921	0.213991	-0.0177933	28
Ni	9-762968	9	762968	2.64e-09	5.72e-05	0.464345	0.199921	0.215758	-0.0190277	28
Ni	9-763242	9	763242	5.08e-10	1.31e-05	0.462134	0.199921	0.217212	-0.0198904	28
Ni	9-928732	9	928732	3.63e-06	0.0325565	0.262023	0.199921	0.209472	-0.0176399	29
Ni	9-931562	9	931562	3.39e-07	0.00476745	0.193477	0.199921	0.211519	-0.0214893	29
Ni	9-931606	9	931606	1.8e-07	0.00269954	0.202875	0.199921	0.212069	-0.0214684	29
Ni	9-931624	9	931624	1.87e-06	0.019863	0.223328	0.199921	0.210041	-0.0185176	29
Ni	9-981093	9	981093	2.7e-06	0.0263915	0.10503	0.199921	0.209726	-0.0264145	29
Ni	9-1006036	9	1006036	4.2e-08	0.000732541	0.271421	0.199921	0.213335	-0.0206768	29
Ni	9-1165328	9	1165328	2.46e-06	0.0245094	0.349917	0.199921	0.209807	-0.0171935	29
Ni	9-1166378	9	1166378	4.3e-06	0.0367838	0.35047	0.199921	0.209328	-0.0168051	29
Ni	9-1227227	9	1227227	2.71e-06	0.0264263	0.339414	0.199921	0.209723	-0.0174468	29
Ni	9-1228220	9	1228220	3.72e-06	0.0331142	0.34052	0.199921	0.209451	-0.0174019	29
Ni	9-1229485	9	1229485	1.39e-06	0.0159447	0.331122	0.199921	0.210296	-0.0183435	29
Ni	9-1229719	9	1229719	3.96e-06	0.0346253	0.321172	0.199921	0.209398	-0.017542	29
Ni	9-1231733	9	1231733	5.56e-06	0.0444783	0.338308	0.199921	0.209107	-0.0170165	29
Ni	9-1232922	9	1232922	2.8e-06	0.0268849	0.330569	0.199921	0.209697	-0.0177868	29
Ni	9-1234651	9	1234651	6.27e-06	0.0482831	0.149254	0.199921	0.209004	-0.0220244	29
Ni	9-1238319	9	1238319	5.21e-07	0.00688139	0.305694	0.199921	0.211147	-0.019571	29
Ni	9-1240657	9	1240657	9.65e-07	0.0116496	0.334992	0.199921	0.210613	-0.0184662	29
Ni	9-1240707	9	1240707	5.14e-07	0.00680866	0.369265	0.199921	0.211158	-0.0180106	29
Ni	9-1241133	9	1241133	5.6e-06	0.0446312	0.349364	0.199921	0.2091	-0.0167159	29
Ni	9-1243802	9	1243802	3.45e-06	0.0314612	0.364842	0.199921	0.209517	-0.0167514	29
Ni	9-1245320	9	1245320	2.64e-06	0.0259911	0.358209	0.199921	0.209747	-0.0172463	29
Ni	9-1248468	9	1248468	1.02e-07	0.00164648	0.383085	0.199921	0.212561	-0.019154	29
Ni	9-1489527	9	1489527	3.92e-06	0.0344012	0.076838	0.199921	0.209407	-0.0286808	29
Ni	9-1489707	9	1489707	3.49e-06	0.0317754	0.0762852	0.199921	0.209505	-0.0289457	29
Ni	9-1504660	9	1504660	6.38e-06	0.0488483	0.226645	0.199921	0.208989	-0.0188078	29
Ni	9-1506718	9	1506718	2.86e-10	7.99e-06	0.17026	0.199921	0.21772	-0.0305696	29
Ni	9-1546075	9	1546075	3.36e-09	7.09e-05	0.168049	0.199921	0.215547	-0.0286256	29
Ni	9-1549101	9	1549101	3.55e-08	0.000631743	0.283029	0.199921	0.213484	-0.021222	29
Ni	9-1554448	9	1554448	1.9e-07	0.00281815	0.178552	0.199921	0.212022	-0.0243374	29
Ni	9-1556320	9	1556320	1.25e-09	2.96e-05	0.17026	0.199921	0.216417	-0.029142	29
Ni	9-1578796	9	1578796	7.71e-09	0.000152531	0.16639	0.199921	0.214819	-0.028039	29
Ni	9-1579262	9	1579262	2.1e-09	4.66e-05	0.161968	0.199921	0.21596	-0.0295117	29
Ni	9-1582217	9	1582217	3.18e-06	0.0294274	0.214483	0.199921	0.209585	-0.0197254	29
Ni	9-1587788	9	1587788	1.22e-07	0.00192695	0.188502	0.199921	0.212408	-0.023244	29
Ni	9-1595061	9	1595061	8.69e-07	0.0106893	0.208402	0.199921	0.210704	-0.0210968	29
Ni	9-1597686	9	1597686	3.71e-10	1e-05	0.163626	0.199921	0.217488	-0.0307303	29
Ni	9-1597917	9	1597917	8.9e-07	0.0109012	0.238806	0.199921	0.210684	-0.0198771	29
Ni	9-1606276	9	1606276	1.3e-10	3.91e-06	0.165285	0.199921	0.218419	-0.031384	29
Ni	9-1614164	9	1614164	9.78e-08	0.00158543	0.200663	0.199921	0.212599	-0.0235347	29
Ni	9-1712542	9	1712542	2.31e-07	0.00335944	0.149807	0.199921	0.211853	-0.026751	29
Ni	9-1718769	9	1718769	3.99e-08	0.000698334	0.235489	0.199921	0.21338	-0.0220989	29
Ni	9-1729772	9	1729772	7.99e-08	0.00132986	0.26534	0.199921	0.212774	-0.0203266	29
Ni	9-1730737	9	1730737	2.39e-07	0.00346241	0.25152	0.199921	0.211823	-0.020011	29
Ni	9-1732777	9	1732777	2.23e-08	0.000407642	0.253179	0.199921	0.213889	-0.0217517	29
Ni	9-1736457	9	1736457	1.29e-09	3.04e-05	0.224986	0.199921	0.216387	-0.025064	29
Ni	9-1799495	9	1799495	3.72e-09	7.78e-05	0.293532	0.199921	0.215459	-0.0217047	29
Ni	9-1799713	9	1799713	5.6e-06	0.0446312	0.358209	0.199921	0.2091	-0.0155749	29
Ni	9-1809979	9	1809979	4.42e-06	0.037497	0.343836	0.199921	0.209304	-0.0161474	29
Ni	9-1810037	9	1810037	1.62e-06	0.0179102	0.345495	0.199921	0.210164	-0.0168691	29
Ni	9-1810038	9	1810038	6.02e-06	0.0471043	0.0923162	0.199921	0.209039	-0.0272015	29
Ni	9-1810102	9	1810102	5.45e-07	0.00716463	0.463792	0.199921	0.211108	-0.0167566	29
Ni	9-1810892	9	1810892	2.92e-06	0.027724	0.347706	0.199921	0.209659	-0.0164484	29
Ni	9-1811651	9	1811651	3.32e-06	0.0305444	0.348259	0.199921	0.209548	-0.0163272	29
Ni	9-1812439	9	1812439	3.97e-06	0.0346927	0.0873411	0.199921	0.209395	-0.0279432	29
Ni	9-1812615	9	1812615	4.82e-06	0.03995	0.344942	0.199921	0.209229	-0.0161228	29
Ni	9-1812711	9	1812711	3.6e-07	0.00499508	0.22775	0.199921	0.211467	-0.0205378	29
Ni	9-1812737	9	1812737	2.17e-06	0.0221378	0.338861	0.199921	0.209917	-0.0166739	29
Ni	9-1812752	9	1812752	7.42e-07	0.00947349	0.225539	0.199921	0.21084	-0.0200757	29
Ni	9-1831675	9	1831675	4.34e-07	0.00591852	0.34052	0.199921	0.211305	-0.0178599	29	Ni-4
Ni	9-1831873	9	1831873	3.05e-06	0.0284866	0.0784964	0.199921	0.209623	-0.030081	29	Ni-4
Ni	9-1831933	9	1831933	3.05e-06	0.0284866	0.0784964	0.199921	0.209623	-0.0300187	29	Ni-4
Ni	9-1831950	9	1831950	5.45e-07	0.00716463	0.349917	0.199921	0.211108	-0.0176464	29	Ni-4
Ni	9-1832262	9	1832262	2.01e-06	0.0209439	0.347153	0.199921	0.209981	-0.0167244	29	Ni-4
Ni	9-1832583	9	1832583	4.28e-07	0.00585532	0.13654	0.199921	0.211317	-0.0240682	29	Ni-4
Ni	9-1832596	9	1832596	3.58e-06	0.0322591	0.0840243	0.199921	0.209485	-0.0286801	29	Ni-4
Ni	9-1832600	9	1832600	6.72e-07	0.00864308	0.351575	0.199921	0.210927	-0.0175015	29	Ni-4
Ni	9-1832923	9	1832923	3.27e-07	0.00461966	0.35047	0.199921	0.211549	-0.0179194	29	Ni-4
Ni	9-1833020	9	1833020	5.55e-07	0.00729232	0.348811	0.199921	0.211091	-0.0175367	29	Ni-4
Ni	9-1833211	9	1833211	1.95e-06	0.0204693	0.33665	0.199921	0.210005	-0.0167974	29	Ni-4
Ni	9-1833231	9	1833231	7.76e-07	0.00980817	0.345495	0.199921	0.210802	-0.0174278	29	Ni-4
Ni	9-1833646	9	1833646	2.46e-06	0.0245094	0.344389	0.199921	0.209808	-0.0166127	29	Ni-4
Ni	9-1833647	9	1833647	8.65e-07	0.0106893	0.353234	0.199921	0.210708	-0.0171962	29	Ni-4
Ni	9-1833693	9	1833693	1.95e-06	0.0204693	0.0801548	0.199921	0.210005	-0.0302867	29	Ni-4
Ni	9-1833715	9	1833715	3.84e-06	0.0338708	0.349364	0.199921	0.209424	-0.0161492	29	Ni-4
Ni	9-1833911	9	1833911	1.41e-06	0.0160326	0.348259	0.199921	0.210289	-0.0169332	29	Ni-4
Ni	9-1834009	9	1834009	2.02e-06	0.0210176	0.347706	0.199921	0.209976	-0.0166236	29	Ni-4
Ni	9-1834100	9	1834100	1.36e-06	0.0156722	0.342178	0.199921	0.210316	-0.0170453	29	Ni-4
Ni	9-1834319	9	1834319	2.03e-06	0.0210385	0.0829187	0.199921	0.209971	-0.0288631	29	Ni-4
Ni	9-1834346	9	1834346	4.38e-07	0.00595689	0.343284	0.199921	0.211298	-0.0177375	29	Ni-4
Ni	9-1834430	9	1834430	2.65e-06	0.026023	0.0851299	0.199921	0.209744	-0.0286353	29	Ni-4
Ni	9-1834533	9	1834533	8.18e-09	0.000161125	0.383637	0.199921	0.214766	-0.0197172	29	Ni-4
Ni	9-1834612	9	1834612	8.3e-07	0.0103685	0.356551	0.199921	0.210744	-0.0171631	29	Ni-4
Ni	9-1834868	9	1834868	1.03e-08	0.000197482	0.379215	0.199921	0.214566	-0.0196059	29	Ni-4
Ni	9-1834877	9	1834877	2.89e-08	0.000520942	0.381426	0.199921	0.213663	-0.0188786	29	Ni-4
Ni	9-1834887	9	1834887	2.03e-06	0.0210385	0.343284	0.199921	0.209971	-0.016621	29	Ni-4
Ni	9-1834940	9	1834940	3.09e-06	0.0288528	0.079602	0.199921	0.209609	-0.0297402	29	Ni-4
Ni	9-1835064	9	1835064	3.75e-06	0.0333505	0.0790492	0.199921	0.209443	-0.029603	29	Ni-4
Ni	9-1835140	9	1835140	1.06e-06	0.0126761	0.323936	0.199921	0.210531	-0.0174704	29	Ni-4
Ni	9-1835304	9	1835304	9.92e-08	0.00160519	0.361526	0.199921	0.212587	-0.0183937	29	Ni-4
Ni	9-1836385	9	1836385	5.45e-08	0.000930436	0.327253	0.199921	0.213109	-0.0187258	29	Ni-4
Ni	9-1836445	9	1836445	1.73e-06	0.0188059	0.347706	0.199921	0.210111	-0.016991	29	Ni-4
Ni	9-1836746	9	1836746	1.24e-06	0.0145196	0.12272	0.199921	0.210396	-0.0244315	29	Ni-4
Ni	9-1836954	9	1836954	2.99e-11	1.08e-06	0.44555	0.199921	0.219719	-0.0219065	29	Ni-4
Ni	9-1837071	9	1837071	1.31e-08	0.000247591	0.385296	0.199921	0.214357	-0.0193684	29	Ni-4
Ni	9-1837094	9	1837094	9.75e-08	0.00158396	0.371476	0.199921	0.212602	-0.0181643	29	Ni-4
Ni	9-1837130	9	1837130	7.74e-09	0.000152878	0.293532	0.199921	0.214815	-0.0216156	29	Ni-4
Ni	9-1837180	9	1837180	3.43e-08	0.000613064	0.372582	0.199921	0.213512	-0.019011	29	Ni-4
Ni	9-1837181	9	1837181	3.35e-06	0.0307203	0.320619	0.199921	0.20954	-0.016867	29	Ni-4
Ni	9-1837219	9	1837219	2.31e-06	0.023378	0.372029	0.199921	0.209861	-0.0159229	29	Ni-4
Ni	9-1837671	9	1837671	6.28e-07	0.00810422	0.106136	0.199921	0.210985	-0.0277141	29	Ni-4
Ni	9-1837696	9	1837696	1.2e-08	0.000229119	0.403538	0.199921	0.214427	-0.0191229	29	Ni-4
Ni	9-1837786	9	1837786	2.06e-08	0.000377389	0.383637	0.199921	0.213959	-0.0190049	29	Ni-4
Ni	9-1838268	9	1838268	6.22e-09	0.000124385	0.405749	0.199921	0.215007	-0.0194814	29	Ni-4
Ni	9-1838433	9	1838433	2.23e-06	0.0227424	0.331675	0.199921	0.20989	-0.0168028	29	Ni-4
Ni	9-1838467	9	1838467	6.58e-06	0.0496532	0.371476	0.199921	0.208963	-0.0153716	29	Ni-4
Ni	9-1838519	9	1838519	4.63e-09	9.52e-05	0.40796	0.199921	0.215265	-0.0196334	29	Ni-4
Ni	9-1838801	9	1838801	2.91e-06	0.0276822	0.0751797	0.199921	0.209662	-0.0312974	29	Ni-4
Ni	9-1838873	9	1838873	2.98e-10	8.32e-06	0.39801	0.199921	0.217682	-0.0213904	29	Ni-4
Ni	9-1839081	9	1839081	7.31e-10	1.83e-05	0.433941	0.199921	0.21689	-0.0206243	29	Ni-4
Ni	9-1839974	9	1839974	1.28e-09	3.02e-05	0.431177	0.199921	0.216398	-0.0203341	29	Ni-4
Ni	9-1840427	9	1840427	5.2e-06	0.0423423	0.341072	0.199921	0.209164	-0.0160815	29	Ni-4
Ni	9-1841188	9	1841188	3.37e-06	0.0308261	0.079602	0.199921	0.209536	-0.0293241	29	Ni-4
Ni	9-1841417	9	1841417	3.88e-09	8.04e-05	0.359315	0.199921	0.215422	-0.0209241	29	Ni-4
Ni	9-1841484	9	1841484	2.97e-09	6.32e-05	0.36042	0.199921	0.215657	-0.0210453	29	Ni-4
Ni	9-1843074	9	1843074	8.01e-07	0.0100851	0.339967	0.199921	0.210775	-0.0171262	29	Ni-4
Ni	9-1843773	9	1843773	9.66e-09	0.000187439	0.271973	0.199921	0.214621	-0.0222976	29	Ni-4
Ni	9-1854341	9	1854341	1.68e-09	3.84e-05	0.274737	0.199921	0.216157	-0.0234818	29	Ni-4
Ni	9-1854794	9	1854794	6.2e-09	0.000124385	0.269762	0.199921	0.215009	-0.0226942	29	Ni-4
Ni	9-1854925	9	1854925	2.48e-07	0.00357367	0.46932	0.199921	0.21179	-0.0170729	29	Ni-4
Ni	9-1855960	9	1855960	3.12e-06	0.0289948	0.0790492	0.199921	0.209601	-0.0293835	29	Ni-4
Ni	9-1858482	9	1858482	2.75e-06	0.0266108	0.0801548	0.199921	0.209712	-0.0295805	29	Ni-4
Ni	9-1859226	9	1859226	1.27e-07	0.00199146	0.432283	0.199921	0.212368	-0.0180269	29	Ni-4
Ni	9-1859519	9	1859519	2.84e-06	0.0271928	0.0801548	0.199921	0.209685	-0.0295352	29	Ni-4
Ni	9-1859751	9	1859751	2.82e-06	0.0270955	0.0812604	0.199921	0.209689	-0.0292307	29	Ni-4
Ni	9-1860118	9	1860118	1.63e-06	0.0179663	0.0801548	0.199921	0.210159	-0.0302772	29	Ni-4
Ni	9-1861304	9	1861304	4.89e-09	9.97e-05	0.285793	0.199921	0.215217	-0.0225374	29	Ni-4
Ni	9-1861428	9	1861428	1.45e-10	4.31e-06	0.260365	0.199921	0.218318	-0.0255636	29	Ni-4
Ni	9-1862919	9	1862919	5.74e-06	0.045493	0.0823659	0.199921	0.209079	-0.0281065	29	Ni-4
Ni	9-1862950	9	1862950	5.15e-06	0.042096	0.0762852	0.199921	0.209172	-0.0291142	29	Ni-4
Ni	9-1863957	9	1863957	6.09e-06	0.0474532	0.257048	0.199921	0.209029	-0.0173178	29	Ni-4
Ni	9-1865635	9	1865635	1.63e-06	0.0179663	0.0801548	0.199921	0.210159	-0.0302772	29	Ni-4
Ni	9-1873495	9	1873495	3.84e-06	0.0338767	0.0784964	0.199921	0.209423	-0.0295025	29	Ni-4
Ni	9-1874018	9	1874018	4.56e-11	1.59e-06	0.276396	0.199921	0.219344	-0.0256359	29	Ni-4
Ni	9-1874106	9	1874106	6.14e-11	2.01e-06	0.276396	0.199921	0.21908	-0.0254084	29	Ni-4
Ni	9-1874128	9	1874128	5.04e-11	1.72e-06	0.274185	0.199921	0.219256	-0.0255258	29	Ni-4
Ni	9-1874215	9	1874215	1.32e-10	3.96e-06	0.273632	0.199921	0.2184	-0.0250102	29	Ni-4
Ni	9-1874250	9	1874250	7.18e-11	2.28e-06	0.273079	0.199921	0.218942	-0.0255316	29	Ni-4
Ni	9-1874267	9	1874267	4.31e-12	1.97e-07	0.320066	0.199921	0.221442	-0.0255466	29	Ni-4
Ni	9-1874367	9	1874367	1.13e-10	3.47e-06	0.275843	0.199921	0.218542	-0.0251479	29	Ni-4
Ni	9-1874430	9	1874430	9.59e-11	2.96e-06	0.27916	0.199921	0.218686	-0.0250352	29	Ni-4
Ni	9-1874479	9	1874479	1.42e-06	0.0161354	0.0801548	0.199921	0.210282	-0.0304596	29	Ni-4
Ni	9-1874690	9	1874690	1.74e-06	0.0188722	0.0784964	0.199921	0.210105	-0.030563	29	Ni-4
Ni	9-1874854	9	1874854	1.5e-06	0.0169301	0.46932	0.199921	0.210232	-0.0161745	29	Ni-4
Ni	9-1874866	9	1874866	2.33e-11	8.59e-07	0.278054	0.199921	0.219942	-0.0258974	29	Ni-4
Ni	9-1874874	9	1874874	8.24e-13	4.51e-08	0.405749	0.199921	0.222919	-0.0241361	29	Ni-4
Ni	9-1875204	9	1875204	3.54e-11	1.26e-06	0.276396	0.199921	0.21957	-0.02577	29	Ni-4
Ni	9-1875761	9	1875761	1.48e-11	5.73e-07	0.278054	0.199921	0.220346	-0.0262463	29	Ni-4
Ni	9-1875785	9	1875785	1.4e-13	8.82e-09	0.468214	0.199921	0.224503	-0.0240272	29	Ni-4
Ni	9-1890779	9	1890779	1.15e-13	7.35e-09	0.274737	0.199921	0.224681	-0.0284712	29	Ni-4
Ni	9-1890784	9	1890784	9.66e-07	0.0116496	0.37424	0.199921	0.210612	-0.0171887	29	Ni-4
Ni	9-1890923	9	1890923	8e-12	3.41e-07	0.268657	0.199921	0.220891	-0.0268132	29	Ni-4
Ni	9-1891892	9	1891892	6.34e-13	3.62e-08	0.26534	0.199921	0.223154	-0.0284743	29	Ni-4
Ni	9-1892047	9	1892047	1.05e-12	5.46e-08	0.271421	0.199921	0.222699	-0.0277742	29	Ni-4
Ni	9-1892152	9	1892152	9.24e-13	4.95e-08	0.268657	0.199921	0.222817	-0.0279835	29	Ni-4
Ni	9-1892612	9	1892612	1.97e-06	0.0206218	0.378109	0.199921	0.209997	-0.0166764	29	Ni-4
Ni	9-1892778	9	1892778	4.46e-12	2e-07	0.267551	0.199921	0.221412	-0.0270531	29	Ni-4
Ni	9-1892805	9	1892805	4.41e-12	2e-07	0.264787	0.199921	0.221421	-0.0271996	29	Ni-4
Ni	9-1892806	9	1892806	6.49e-11	2.11e-06	0.323936	0.199921	0.219032	-0.0235145	29	Ni-4
Ni	9-1892837	9	1892837	1.16e-11	4.64e-07	0.266998	0.199921	0.220561	-0.0266187	29	Ni-4
Ni	9-1892855	9	1892855	9.67e-07	0.0116496	0.378109	0.199921	0.210611	-0.0171775	29	Ni-4
Ni	9-1892967	9	1892967	8.72e-07	0.0107005	0.377004	0.199921	0.210701	-0.0172053	29	Ni-4
Ni	9-1892972	9	1892972	2.75e-06	0.0266108	0.183527	0.199921	0.209712	-0.0196386	29	Ni-4
Ni	9-1899197	9	1899197	4.52e-11	1.58e-06	0.310669	0.199921	0.219352	-0.0239684	29	Ni-4
Ni	9-1899412	9	1899412	4.78e-11	1.64e-06	0.260365	0.199921	0.219303	-0.0259328	29	Ni-4
Ni	9-1899473	9	1899473	9.43e-11	2.92e-06	0.266446	0.199921	0.2187	-0.0251999	29	Ni-4
Ni	9-1899574	9	1899574	8.89e-10	2.19e-05	0.268657	0.199921	0.216718	-0.0236882	29	Ni-4
Ni	9-1923289	9	1923289	3.32e-09	7.01e-05	0.280265	0.199921	0.215559	-0.0224634	29	Ni-4
Ni	9-1923310	9	1923310	3.24e-06	0.0298949	0.329464	0.199921	0.20957	-0.0164546	29	Ni-4
Ni	9-1923432	9	1923432	8.68e-07	0.0106893	0.325041	0.199921	0.210705	-0.0175842	29	Ni-4
Ni	9-1924764	9	1924764	5.8e-10	1.49e-05	0.272526	0.199921	0.217095	-0.0238013	29	Ni-4
Ni	9-1932233	9	1932233	9.46e-09	0.000183885	0.264234	0.199921	0.21464	-0.0223223	29	Ni-4
Ni	9-1932487	9	1932487	1.33e-06	0.0154243	0.336097	0.199921	0.210335	-0.0170115	29	Ni-4
Ni	9-1932569	9	1932569	1.91e-06	0.020137	0.169707	0.199921	0.210025	-0.0214881	29	Ni-4
Ni	9-1932667	9	1932667	1.31e-07	0.00203539	0.295744	0.199921	0.212348	-0.0193274	29	Ni-4
Ni	9-1934905	9	1934905	1.84e-07	0.00275108	0.28911	0.199921	0.212051	-0.0191037	29	Ni-4
Ni	9-1935017	9	1935017	2.91e-06	0.0276536	0.34052	0.199921	0.209664	-0.0161556	29	Ni-4
Ni	9-1974260	9	1974260	4.67e-07	0.00625368	0.202875	0.199921	0.211242	-0.0217414	29	Ni-4
Ni	9-1980725	9	1980725	1.53e-06	0.0172012	0.286899	0.199921	0.210214	-0.0181224	29	Ni-4
Ni	9-2068075	9	2068075	6.23e-06	0.0482108	0.11885	0.199921	0.209009	-0.023007	29
Ni	9-2068770	9	2068770	4.97e-09	0.000101027	0.276949	0.199921	0.215203	-0.022727	29
Ni	9-2068951	9	2068951	7.15e-08	0.00119412	0.286899	0.199921	0.212872	-0.020653	29
Ni	9-2069000	9	2069000	1.07e-08	0.000205727	0.279713	0.199921	0.214528	-0.0222709	29
Ni	9-2069086	9	2069086	4.06e-09	8.38e-05	0.280818	0.199921	0.215381	-0.0228305	29
Ni	9-2069223	9	2069223	4.65e-07	0.0062382	0.315091	0.199921	0.211246	-0.0185111	29
Ni	9-2069259	9	2069259	8.44e-07	0.0105033	0.317302	0.199921	0.21073	-0.0179901	29
Ni	9-2069324	9	2069324	3.62e-08	0.000642236	0.286346	0.199921	0.213466	-0.0210701	29
Ni	9-2069333	9	2069333	4.05e-09	8.38e-05	0.276396	0.199921	0.215383	-0.0229864	29
Ni	9-2069450	9	2069450	3.93e-08	0.000691144	0.294085	0.199921	0.213393	-0.0211966	29
Ni	9-2069533	9	2069533	8.24e-09	0.000161907	0.27916	0.199921	0.21476	-0.0224634	29
Ni	9-2069601	9	2069601	3.53e-06	0.0319395	0.327805	0.199921	0.209497	-0.0166854	29
Ni	9-2069652	9	2069652	2.28e-07	0.00334342	0.304588	0.199921	0.211862	-0.0190566	29
Ni	9-2069680	9	2069680	1.78e-08	0.000331186	0.28524	0.199921	0.214086	-0.0215639	29
Ni	9-2069684	9	2069684	4.74e-06	0.0394732	0.370923	0.199921	0.209243	-0.0155791	29
Ni	9-2070015	9	2070015	5.48e-08	0.00093313	0.306247	0.199921	0.213104	-0.019909	29
Ni	9-2070129	9	2070129	3.18e-08	0.000570024	0.305141	0.199921	0.213578	-0.0209079	29
Ni	9-2070176	9	2070176	6.48e-08	0.00108584	0.301271	0.199921	0.212957	-0.0200808	29
Ni	9-2070214	9	2070214	9.88e-09	0.000190277	0.28911	0.199921	0.214601	-0.0219964	29
Ni	9-2070319	9	2070319	3.6e-09	7.54e-05	0.282477	0.199921	0.215488	-0.0228454	29
Ni	9-2070358	9	2070358	2.13e-09	4.7e-05	0.276949	0.199921	0.21595	-0.02345	29
Ni	9-2070363	9	2070363	3.34e-10	9.15e-06	0.271973	0.199921	0.217582	-0.0249269	29
Ni	9-2070428	9	2070428	7.17e-10	1.8e-05	0.279713	0.199921	0.216908	-0.0239243	29
Ni	9-2070470	9	2070470	2.39e-09	5.22e-05	0.280265	0.199921	0.215848	-0.0231556	29
Ni	9-2070510	9	2070510	1.4e-08	0.000264019	0.302377	0.199921	0.214294	-0.0211886	29
Ni	9-2070777	9	2070777	6.94e-10	1.76e-05	0.280818	0.199921	0.216936	-0.0239719	29
Ni	9-2070959	9	2070959	1.11e-07	0.00178134	0.298507	0.199921	0.212489	-0.0199838	29
Ni	9-2071074	9	2071074	4.01e-10	1.07e-05	0.276396	0.199921	0.21742	-0.024493	29
Ni	9-2109926	9	2109926	3.76e-09	7.83e-05	0.273632	0.199921	0.215448	-0.0232519	29
Ni	9-2109976	9	2109976	1.44e-09	3.34e-05	0.380321	0.199921	0.216293	-0.0213179	29
Ni	9-2110130	9	2110130	2.42e-07	0.00349266	0.310669	0.199921	0.211813	-0.0192248	29
Ni	9-2110172	9	2110172	2.64e-09	5.71e-05	0.27529	0.199921	0.215761	-0.0233973	29
Ni	9-2110331	9	2110331	4.78e-10	1.25e-05	0.270868	0.199921	0.217265	-0.0246341	29
Ni	9-2110535	9	2110535	1.69e-09	3.86e-05	0.27529	0.199921	0.21615	-0.0236492	29
Ni	9-2110607	9	2110607	1.5e-07	0.00231455	0.296296	0.199921	0.212225	-0.0202926	29
Ni	9-2121551	9	2121551	8.14e-08	0.00134886	0.425097	0.199921	0.212758	-0.017945	29
Ni	9-2121561	9	2121561	1e-07	0.00161705	0.395799	0.199921	0.212578	-0.0179764	29
Ni	9-2596296	9	2596296	6.27e-06	0.0482831	0.14262	0.199921	0.209004	-0.0212672	29
Ni	9-3530202	9	3530202	2.32e-06	0.0233995	0.147043	0.199921	0.209859	-0.0245908
Ni	9-10328345	9	10328345	5.65e-06	0.0449186	0.283582	0.199921	0.209093	0.0166149	30
Ni	9-10414656	9	10414656	3.03e-07	0.00429989	0.0939746	0.199921	0.211616	0.028425	30
Ni	9-10418056	9	10418056	3.46e-07	0.00485403	0.0956329	0.199921	0.2115	0.0279563	30
Ni	9-10438748	9	10438748	3.86e-07	0.00533643	0.0983969	0.199921	0.211405	0.0274753	30
Ni	9-10448846	9	10448846	2.21e-07	0.00324027	0.145937	0.199921	0.211891	0.024174	30
Ni	9-90831243	9	90831243	2.95e-06	0.027896	0.0187949	0.199921	0.209651	0.0509867
Ni	10-146895825	10	146895825	6.09e-06	0.0474532	0.180763	0.199921	0.209029	0.0192138	31
Ni	10-146961588	10	146961588	2.95e-06	0.027902	0.230514	0.199921	0.20965	0.0181991	31
Zn	5-131108654	5	131108654	2.37e-07	0.0457695	0.0501931	0.223927	0.235452	-0.040004
Zn	5-195642512	5	195642512	5.08e-08	0.020628	0.0926641	0.223927	0.23675	-0.0320753	32	Zn-5
Zn	5-195642728	5	195642728	1.41e-07	0.029358	0.100386	0.223927	0.235891	-0.0296709	32	Zn-5
Zn	5-195642793	5	195642793	6.19e-08	0.0227528	0.11914	0.223927	0.236583	-0.029212	32	Zn-5
Zn	5-195643066	5	195643066	1.76e-08	0.020628	0.0943188	0.223927	0.237647	-0.0329637	32	Zn-5
Zn	5-195643120	5	195643120	1.98e-08	0.020628	0.0987314	0.223927	0.237546	-0.0325138	32	Zn-5
Zn	5-195644762	5	195644762	4.91e-08	0.020628	0.0932157	0.223927	0.236779	-0.0320261	32	Zn-5
Zn	5-195645997	5	195645997	4.38e-08	0.020628	0.0932157	0.223927	0.236875	-0.0321459	32	Zn-5
Zn	5-195646460	5	195646460	8.21e-08	0.0234658	0.0932157	0.223927	0.236345	-0.031359	32	Zn-5
Zn	5-195646667	5	195646667	4.91e-08	0.020628	0.0932157	0.223927	0.236779	-0.0320261	32	Zn-5
Zn	5-195646839	5	195646839	3.44e-08	0.020628	0.0921125	0.223927	0.23708	-0.0326675	32	Zn-5
Zn	5-195712631	5	195712631	2.52e-07	0.0475392	0.109211	0.223927	0.2354	-0.0282187	32	Zn-5
Zn	5-195715496	5	195715496	6.03e-08	0.0227528	0.0987314	0.223927	0.236605	-0.0311733	32	Zn-5
Zn	5-195716693	5	195716693	7.31e-08	0.0234658	0.15444	0.223927	0.236443	-0.0254734	32	Zn-5
Zn	5-195717179	5	195717179	9.91e-08	0.0250653	0.0970767	0.223927	0.236186	-0.0310207	32	Zn-5
Zn	5-195717298	5	195717298	9.86e-08	0.0250653	0.131274	0.223927	0.236191	-0.0268477	32	Zn-5
Zn	5-195717759	5	195717759	1.14e-08	0.0175484	0.103144	0.223927	0.238017	-0.0322439	32	Zn-5
Zn	5-195717849	5	195717849	1.13e-08	0.0175484	0.100386	0.223927	0.238025	-0.0327416	32	Zn-5
Zn	5-195718170	5	195718170	8.45e-09	0.0175484	0.0976282	0.223927	0.238268	-0.0334139	32	Zn-5
Zn	5-195718354	5	195718354	4.87e-08	0.020628	0.136238	0.223927	0.236786	-0.0269983	32	Zn-5
Zn	5-195720127	5	195720127	3.76e-08	0.020628	0.0970767	0.223927	0.237004	-0.0320897	32	Zn-5
Zn	5-195721019	5	195721019	3.36e-08	0.020628	0.107005	0.223927	0.237099	-0.0306018	32	Zn-5
Zn	5-195722854	5	195722854	1.04e-07	0.0250653	0.108108	0.223927	0.236147	-0.0293378	32	Zn-5
Zn	5-195723309	5	195723309	1.03e-07	0.0250653	0.113072	0.223927	0.23615	-0.028911	32	Zn-5
Zn	5-195723790	5	195723790	6.79e-08	0.0234658	0.106453	0.223927	0.236505	-0.0303922	32	Zn-5
Zn	5-195751029	5	195751029	2.12e-07	0.0429337	0.0937672	0.223927	0.235548	-0.0308647	32	Zn-5
Zn	5-195751587	5	195751587	1.2e-07	0.0273007	0.103144	0.223927	0.236024	-0.0296991	32	Zn-5
Zn	5-195751630	5	195751630	1.39e-07	0.029358	0.0937672	0.223927	0.235901	-0.0311259	32	Zn-5
Zn	5-195760678	5	195760678	5.05e-08	0.020628	0.0987314	0.223927	0.236755	-0.0313523	32	Zn-5
Zn	5-195762650	5	195762650	1.08e-07	0.0252017	0.100938	0.223927	0.236116	-0.0299947	32	Zn-5
Zn	5-195764403	5	195764403	7.81e-08	0.0234658	0.100938	0.223927	0.236387	-0.0303176	32	Zn-5
Zn	5-195765457	5	195765457	3.25e-08	0.020628	0.407612	0.223927	0.237129	0.0204681	32	Zn-5
Zn	5-195765640	5	195765640	1.1e-09	0.00851139	0.43519	0.223927	0.24	0.0222146	32	Zn-5
Zn	5-195765968	5	195765968	1.38e-07	0.029358	0.236624	0.223927	0.235909	0.0244762	32	Zn-5
Zn	5-195766751	5	195766751	8.12e-08	0.0234658	0.230557	0.223927	0.236354	0.0252345	32	Zn-5
Zn	5-195767429	5	195767429	7.72e-08	0.0234658	0.23166	0.223927	0.236397	0.0250642	32	Zn-5
Zn	5-195772212	5	195772212	4.26e-08	0.020628	0.229454	0.223927	0.236898	0.02586	32	Zn-5
Zn	5-195806223	5	195806223	9.09e-08	0.0250575	0.227248	0.223927	0.236259	0.0252952	32	Zn-5
Zn	5-195833142	5	195833142	3.09e-08	0.020628	0.228351	0.223927	0.237169	0.0260779	32	Zn-5
Zn	7-179962589	7	179962589	8.67e-09	0.0175484	0.114727	0.223927	0.238247	0.0330341	33	Zn-7
Zn	7-179999701	7	179999701	2.17e-07	0.0429337	0.11914	0.223927	0.235527	0.029261	33	Zn-7
